# Supplementary material for: Computational Analysis of AmpSeq Data for Targeted, High-Throughput Genotyping of Amplicons
Source: Front Plant Sci. 2019 May 14;10:599. doi: 10.3389/fpls.2019.00599 (PMC6528068; doi:10.3389/fpls.2019.00599)
Supplement: FILE S1 — Output of primer design from genotyping-by-sequencing (GBS) markers linked with REN2 powdery mildew resistance in the segregating population “Horizon” × Illinois 547-1, corresponding to the data provided at https://github.com/JFresnedo/AmpSeq/tree/master/1_Primer_Design. Definitions of the column headers are provided in the second tab of Supplementary File S1. [file Table_1.xlsx]

## Sheet: Output
marker	refallele	num_tags	pvalue	phase	reject_code	a1	count	lseq	lseq_len	lseq_pct	rseq	rseq_len	rseq_pct	a2	count	lseq	lseq_len	lseq_pct	rseq	rseq_len	rseq_pct	all_cigars	all_records	lprimer	ltemp	lproblem	rprimer	rtemp	rproblem
S14_25641236	C	4	4.09507e-17	2	0	C	3	CTGCGGTATGTATAGATTTCCAAGAATTCCCTATT	35	95	CCCTTTGGATCAACAGAAGAAACCGAAA	28	100	T	1	CTGCGGTATGTATATATTTCCAAGAATTCCCTATT	35	95	CCCTTTGGATCAACAGAAGAAACCAAAA	28	100	64M; 64M; 64M; 64M;	C:35:95-28:100 C:35:90-28:100 C:35:95-28:100 T:35:95-28:100	atatttccatgaattccctatt	50.571	Temperature too low;	tttcttctgttgatccaaaggg	56.524	Temperature too low;
S14_25641261	G	6	2.79749e-19	2	0	G	3	CTGCGGTATGTATAGATTTCCAAGAATTCCCTATTCCCCTTTGGATCAACAGAAGAAACC	60	100	AAAGGAAAACTGGCTAAAAGCCAACATCTCACTAAAAGTACAGCCTCTAGCAG	53	100	A	3	CTGCGGTATGTATATATTTCCAAGAATTCCCTATCCCCCTTTGGATCAACAGAAGAAACC	60	100	AAAGGAAAACTGGCTAAAAGCCAACATCACACTAAAAGTACAGCCTCTAGCAG	53	100	64M; 64M; 64M; 64M; 64M; 64M;	G:60:100-3:0 A:60:100-3:0 G:60:100-3:0 A:60:100-3:0 G:10:100-53:100 A:10:100-53:100	ctttggatcaacagaagaaacc	55.553	Temperature too low;	ggcttttagccagttttccttt	57.663	Hairpin stability too high;
S14_25641290	T	2	1.48215e-18	2	0	T	1	AGAAGAAACCGAAAGGAAAACTGGCTAAAAGCCAACATC	39	100	CACTAAAAGTACAGCCTCTAGCAG	24	100	A	1	AGAAGAAACCAAAAGGAAAACTGGCTAAAAGCCAACATC	39	100	CACTAAAAGTACAGCCTCTAGCAG	24	100	64M; 64M;	T:39:100-24:100 A:39:100-24:100	aaactggctaaaagccaacatc	57.743	Hairpin stability too high;	gctagaggctgtacttttagtg	56.281	Temperature too low;
S14_25680061	A	6	1.18387e-21	1	0	A	4	CAGCTGAAACAAGAAAAGTTCGGATTCTCTGCAACAGCTCTGCCTTAACTGAATCAGG	58	100	ATAGAAGCTG	10	100	T	2	CAGCTGAAACAAGAAAAGTTCGGATTCTCTGCAACAGCTCTGCCTTCACTGAATCAGG	58	100	ATAGAAGCTG	10	100	64M; 64M; 64M; 64M; 64M; 64M;	A:58:95-5:0 A:58:100-5:0 T:58:100-5:0 T:53:100-10:100 A:53:100-10:100 A:53:95-10:100	gctctgccttcactgaatcagg	61.257		attttgcccctgcagcttctat	60.625	Hairpin stability too high;
S14_25689708	C	3	2.0402e-19	2	5	C	2	CGTGCTCGTGAGATTGATGAATGGTCAAGAAGTAAAGACTACAGATCCCTTTTGAG	56	100	CGTGCAG	7	0	T	1	CGTGCTCGTGAGATTGATGAATGGTCAAGAAGTAAAGACTACAGATCCCTTTTGAG	56	100	CGTGCAG	7	0	64M; 64M; 64M;	T:56:100-7:0 C:56:100-7:0 C:56:100-7:0	aagactacagatcccttttgag	55.19	Temperature too low;	cagaatttatcggtgctgcacg	60.538
S14_25781774	G	4	1.75895e-17	1	5	G	3	CTGCATTGCTTCCCTACTAGGCCAGGGAGGACCTGAAAATTATCGTATAAAATGGC	56	100	CTGGCTC	7	0	A	1	CTGCATTGCTTCCCTACTAGGCCAGGGTGGACCTGAAAATTATCGTATAAAATGGC	56	100	CTGGCTC	7	0	64M; 64M; 64M; 64M;	G:56:100-7:0 G:56:100-7:0 A:56:100-7:0 G:56:100-7:0	gaaaattatcgtataaaatggc	49.856	Temperature too low;	attgttaaagtagcggagccag	58.729	Hairpin stability too high;
S14_25799527	G	6	4.41976e-17	2	0	G	5	CAGCCTCCATTGACACTGAGAGGGAAGCTCTTCTCAA	37	100	TTCAAACAAGGCCTTACAGATCCTTC	26	100	A	1	CAGCCTCCATTGACACTGAGAGGGTAGCTCTTCTCAA	37	100	TTCAAACAAGGCCATACAGATCCTTC	26	95	64M; 64M; 64M; 64M; 64M; 64M;	G:37:95-26:100 G:37:95-26:95 G:37:95-26:100 A:37:100-26:95 G:37:100-26:95 G:37:100-26:100	ctgagagggtagctcttctcaa	58.639		gatctgtaaggccttgtttgaa	56.617	Temperature too low;
S14_25867988	C	8	8.05804e-16	1	0	C	7	CAGCCAGAGGGAAC	14	100	TCGAGTCATCAAGCTCAAACTCCGCAATCAGTATGCTAGAAGTCCGGAC	49	100	G	1	CAGCCAGAGGGTAC	14	100	TCGAGTCATCAAGCTCAAACTCCGCAATCAGTATGCTAGAAGTCCGGAC	49	100	64M; 64M; 64M; 64M; 64M; 64M; 64M; 64M;	C:14:93-49:100 C:14:93-49:100 C:14:93-49:100 C:14:100-49:95 C:14:100-49:95 C:14:100-49:100 G:14:100-49:100 C:14:93-49:100	gtggtgtgcagccagagggtac	65.326	Temperature too high;	gagtttgagcttgatgactcga	58.42
S14_25980111	T	6	3.30962e-18	2	0	T	5	CTGCTAGTGCCTACTTCTCTACCTACCGTTTACGAAAT	38	100	GTTGCTTTACGAAATGGTACCTTTCATTCACTTCAAAAGCCTGGAGCTTATCCTAACGCAG	61	100	C	1	CTGCTAGTGCCTACTTCTCTACCTACCGTTTACGAAAT	38	100	GTTGCTTTACGAAATGGTACCTTTC	25	100	64M; 64M; 64M; 58M6S; 64M; 64M;	C:38:100-25:100 T:38:100-25:95 T:38:100-25:100 T:17:94-40:100 T:2:0-61:100 T:2:0-61:95	ctctacctaccgtttacgaaat	55.417	Temperature too low;	aggtaccatttcgtaaagcaac	56.978	Temperature too low;
S14_25986769	T	10	1.18387e-21	1	0	T	6	CTGCACACAAGCCAGTAGGGGGGGGAGACCTGGCACAGC	39	100	GGTTAGGCCAAGCCAGAAGCAAAAAACAAGAAAACCCAGAAAGCAG	46	100	C	4	CTGCACACAAGCCAGTAGGTGGGGGAGACCTGGCACAGC	39	100	GGTTAGGCCAAGCCAGAAGCAAAAAACAAGAAAACCCAGAAAGCAG	46	100	64M; 64M; 64M; 64M; 64M; 64M; 64M; 64M; 64M; 64M;	T:39:95-24:100 C:39:100-24:100 T:39:100-24:95 T:39:100-24:100 T:17:94-46:100 T:17:100-46:100 C:17:94-46:100 C:17:100-46:100 T:17:100-46:95 C:17:100-46:95	ggtgggggagacctggcacagc	69.323	Temperature too high; Hairpin stability too high;	ttgcttctggcttggcctaacc	63.371	Temperature too high; Hairpin stability too high;
S14_26034150	G	3	1.93529e-19	2	0	G	2	CTGCACATGCCAAGGGCTGAAATTCTCTTTAGTCCTGCAGGCCA	44	100	CCCAACCAGATCTCACCCATCAGAACCTATTAATA	35	100	A	1	CTGCAATTCTCTTTAGTCCTGCAGGCCA	28	100	CCCAACCAGATCTCACCCATCAGAACCTATTAATA	35	100	64M; 64M; 64M;	G:44:100-19:100 A:28:100-35:100 G:28:100-35:100	ttctctttagtcctgcaggcca	61.357		tgatgggtgagatctggttggg	61.757
S14_26062663	G	7	1.18387e-21	1	0	G	5	CTGCAGAGGGTTTGTGGATGT	21	100	GTGGACACTCTTATGAAGGTAAAACATCACATTCATCGCCTTTTATGGGCTGATCTGCAG	60	100	T	2	CTGCAGAGGGTTTGTGGATGT	21	100	GTGGACACTCTTATGAAGGTAAAACATCACATTCATCGCCTTTTATGGGCTGACCTGCAG	60	100	64M; 64M; 64M; 64M; 64M; 64M; 64M;	G:21:100-42:95 G:21:100-42:95 G:21:100-42:100 T:21:100-42:100 G:3:0-60:100 T:3:0-60:100 G:3:0-60:100	gctgcagagggtttgtggatgt	63.36	Temperature too high;	ttaccttcataagagtgtccac	55.213	Temperature too low;
S14_26159394	-	2	9.20911e-19	2	3																	38M26S; 30M2I32M;	T:19:63-18:0	atgctacatttagcatacaata	51.123	Temperature too low; Hairpin stability too high;	caaccacacacaaacactaacc	58.235
S14_26159415	T	2	9.20911e-19	2	2	T	1	TGTGTGTGGT	10	100	GGTTTTTGGAACACTATGTGCAATTTCAAGGATGAAGACAGTTTGTATTGCAG	53	100	T	1	TGTGTGTGGT	10	100	GGTTTTTGGAACACTATGTGCAATTTCAAGGATGAAGACAGTTTGTATTGCAG	53	100	30M2I32M; 64M;	T:10:100-53:100	acggttagtgtttgtgtgtggt	60.616		tgcacatagtgttccaaaaacc	57.685
S14_26159416	G	2	9.20911e-19	2	2	G	1	TGTGTGTGGTT	11	100	GTTTTTGGAACACTATGTGCAATTTCAAGGATGAAGACAGTTTGTATTGCAG	52	100	G	1	TGTGTGTGGTT	11	100	GTTTTTGGAACACTATGTGCAATTTCAAGGATGAAGACAGTTTGTATTGCAG	52	100	30M2I32M; 64M;	G:11:100-52:100	cggttagtgtttgtgtgtggtt	59.579		ttgcacatagtgttccaaaaac	56.011	Temperature too low;
S14_26159418	T	2	9.20911e-19	2	2	T	1	TGTGTGTGGTTGG	13	100	TTTTGGAACACTATGTGCAATTTCAAGGATGAAGACAGTTTGTATTGCAG	50	100	T	1	TGTGTGTGGTTGG	13	100	TTTTGGAACACTATGTGCAATTTCAAGGATGAAGACAGTTTGTATTGCAG	50	100	30M2I32M; 64M;	T:13:100-50:100	gttagtgtttgtgtgtggttgg	58.235		aattgcacatagtgttccaaaa	55.081	Temperature too low;
S14_26159419	T	2	9.20911e-19	2	2	T	1	TGTGTGTGGTTGGT	14	100	TTTGGAACACTATGTGCAATTTCAAGGATGAAGACAGTTTGTATTGCAG	49	100	T	1	TGTGTGTGGTTGGT	14	100	TTTGGAACACTATGTGCAATTTCAAGGATGAAGACAGTTTGTATTGCAG	49	100	30M2I32M; 64M;	T:14:100-49:100	ttagtgtttgtgtgtggttggt	58.577		aaattgcacatagtgttccaaa	55.081	Temperature too low;
S14_26159421	T	2	9.20911e-19	2	2	T	1	TGTGTGTGGTTGGTTT	16	100	TGGAACACTATGTGCAATTTCAAGGATGAAGACAGTTTGTATTGCAG	47	100	T	1	TGTGTGTGGTTGGTTT	16	100	TGGAACACTATGTGCAATTTCAAGGATGAAGACAGTTTGTATTGCAG	47	100	30M2I32M; 64M;	T:16:100-47:100	agtgtttgtgtgtggttggttt	59.369		tgaaattgcacatagtgttcca	56.535	Temperature too low;
S14_26159422	T	2	9.20911e-19	2	2	T	1	TGTGTGTGGTTGGTTTT	17	100	GGAACACTATGTGCAATTTCAAGGATGAAGACAGTTTGTATTGCAG	46	100	T	1	TGTGTGTGGTTGGTTTT	17	100	GGAACACTATGTGCAATTTCAAGGATGAAGACAGTTTGTATTGCAG	46	100	30M2I32M; 64M;	T:17:100-46:100	gtgtttgtgtgtggttggtttt	58.605		ttgaaattgcacatagtgttcc	55.54	Temperature too low;
S14_26159426	A	2	9.20911e-19	2	2	A	1	TGTGTGTGGTTGGTTTTTGGA	21	100	CACTATGTGCAATTTCAAGGATGAAGACAGTTTGTATTGCAG	42	95	A	1	TGTGTGTGGTTGGTTTTTGGA	21	100	CACTATGTGCAATTTCAAGGATGAAGACAGTTTGTATTGCAG	42	95	30M2I32M; 64M;	A:21:100-42:95	ttgtgtgtggttggtttttgga	59.367		atacttgaaattgcacatagtg	52.849	Temperature too low;
S14_26159427	C	2	9.20911e-19	2	2	C	1	TGTGTGTGGTTGGTTTTTGGAA	22	100	ACTATGTGCAATTTCAAGGATGAAGACAGTTTGTATTGCAG	41	95	C	1	TGTGTGTGGTTGGTTTTTGGAA	22	100	ACTATGTGCAATTTCAAGGATGAAGACAGTTTGTATTGCAG	41	95	30M2I32M; 64M;	C:22:100-41:95	tgtgtgtggttggtttttggaa	59.367		catacttgaaattgcacatagt	52.849	Temperature too low;
S14_26159429	C	2	9.20911e-19	2	2	C	1	TGTGTGTGGTTGGTTTTTGGAACA	24	100	TATGTGCAATTTCAAGGATGAAGACAGTTTGTATTGCAG	39	95	C	1	TGTGTGTGGTTGGTTTTTGGAACA	24	100	TATGTGCAATTTCAAGGATGAAGACAGTTTGTATTGCAG	39	95	30M2I32M; 64M;	C:24:100-39:95	tgtgtggttggtttttggaaca	59.367		ttcatacttgaaattgcacata	52.103	Temperature too low;
S14_26159433	G	2	9.20911e-19	2	2	G	1	TGTGTGTGGTTGGTTTTTGGAACACTAT	28	100	TGCAATTTCAAGGATGAAGACAGTTTGTATTGCAG	35	95	G	1	TGTGTGTGGTTGGTTTTTGGAACACTAT	28	100	TGCAATTTCAAGGATGAAGACAGTTTGTATTGCAG	35	95	30M2I32M; 64M;	G:28:100-35:95	tggttggtttttggaacactat	56.36	Temperature too low;	tgtcttcatacttgaaattgca	54.3	Temperature too low;
S14_26159437	A	1	9.20911e-19	2	2	A	1	TGTGTGTGGTTGGTTTTTGGAACACTATGTGC	32	100	ATTTCAAGGATGAAGACAGTTTGTATTGCAG	31	95	A	1	TGTGTGTGGTTGGTTTTTGGAACACTATGTGC	32	100	ATTTCAAGGATGAAGACAGTTTGTATTGCAG	31	95	64M;	A:32:100-31:95	tggtttttggaacactatgtgc	57.685		aaactgtcttcatacttgaaat	51.662	Temperature too low;
S14_26159439	T	1	9.20911e-19	2	2	T	1	TGTGTGTGGTTGGTTTTTGGAACACTATGTGCAA	34	100	TTCAAGGATGAAGACAGTTTGTATTGCAG	29	95	T	1	TGTGTGTGGTTGGTTTTTGGAACACTATGTGCAA	34	100	TTCAAGGATGAAGACAGTTTGTATTGCAG	29	95	64M;	T:34:100-29:95	gtttttggaacactatgtgcaa	56.011	Temperature too low;	acaaactgtcttcatacttgaa	53.619	Temperature too low;
S14_26183868	A	4	1.69677e-16	1	0	A	1	CAGCCAATCACGTGTTAGACACGTGGTG	28	100	CTGATCACCCGGCGCCCGTACTCTCTGTTATGATT	35	100	G	3	CTGCTTTTTCTTGTGTGGGGCCCACCATAACATGCACCCAATCACGTGTTAGACACGTGGTG	62	100	CTGATCACCCGGCGCCCGTACTCTGTGTTATGATT	35	100	64M; 64M; 64M; 64M;	G:62:100-1:0 G:62:100-1:0 A:28:100-35:100 G:28:100-35:100	atcacgtgttagacacgtggtg	60.861	Hairpin stability too high;	agtacgggcgccgggtgatcag	68.758	Temperature too high; Hairpin stability too high;
S14_26183893	G	2	1.69677e-16	1	0	G	1	CAGCCAATCACGTGTTAGACACGTGGTGGCTGATCACCCGGCGCCCGTACTCT	53	100	TGTTATGATT	10	100	C	1	CAGCCAATCACGTGTTAGACACGTGGTGACTGATCACCCGGCGCCCGTACTCT	53	100	TGTTATGATT	10	100	64M; 64M;	C:53:100-10:100 G:53:100-10:100	gatcacccggcgcccgtactct	68.51	Temperature too high;	accgatggcgataatcataaca	57.734
S14_26205721	T	5	1.18387e-21	1	0	T	3	CTGCTGTATTGAAGAATCGATTTGCTGATACCATTTT	37	100	AAAGCTCGAGAAAAGACACTTAATCAGGTTGGTCTCAAATTTGGGCTG	48	100	G	2	CTGCTGTATTGAAGAATCGATTTGCTGATACCATTTT	37	100	AAAGCTCGAGAAAAGACACTTAATCAGGTTGGTCTCAAATTTGGGCTG	48	100	64M; 64M; 64M; 64M; 64M;	G:37:100-26:100 T:37:100-26:100 T:15:93-48:100 T:15:100-48:100 G:15:100-48:100	atcgatttgctgataccatttt	54.487	Temperature too low;	taagtgtcttttctcgagcttt	55.709	Temperature too low;
S14_26215776	C	12	1.18387e-21	2	0	C	10	CAGCCAAAAGCAAAGAGAATGGGAATTGAAAGAGAGAAAATAGAAGGAAACT	52	100	ACACTGGTGGGTGGACCTTGGGTTCCCATGGCTG	34	100	T	2	CAGCCAAAAGCAAAGAGAATGGGAATTGAAAGAGAGAAAATAGAAGGAAACA	52	95	ACACTGGTGGGTGGACCTTGGGTTCCCATGGCTG	34	100	64M; 64M; 64M; 64M; 64M; 64M; 64M; 64M; 64M; 64M; 64M; 64M;	T:52:95-11:100 C:52:100-11:91 C:52:100-11:100 T:29:95-34:100 C:29:95-34:100 C:29:95-34:100 C:29:95-34:100 C:29:100-34:100 C:29:95-34:100 C:29:95-34:100 C:29:95-34:100 C:29:95-34:100	agagagaaaatagaaggaaact	52.163	Temperature too low; Hairpin stability too high;	cccaaggtccacccaccagtgt	66.425	Temperature too high;
S14_26218562	C	5	2.20155e-19	1	0	C	3	CTGCGTGTTCTT	12	100	CACACATATCGTGGAGTGTGGGACTCGTCTCAGCTAAATCAATACCCCACT	51	95	T	2	CTGCGTGTTCTT	12	100	CACACAGATCGTGGAGGGTGGGACTCGTCTCAGCTAAATCAATACCCCATT	51	100	64M; 64M; 64M; 64M; 64M;	C:12:100-51:95 C:12:100-51:90 C:12:100-51:95 T:12:100-51:95 T:12:100-51:100	tatactgaagctgcgtgttctt	57.812		cccacactccacgatctgtgtg	63.109	Temperature too high; Hairpin stability too high;
S14_26218612	-	9	2.20155e-19	1	3																	64M; 64M; 64M; 64M; 64M; 60M4S; 57M7S; 50M14S; 43M21S;	C:62:100-1:0 C:62:100-1:0 C:62:100-1:0 T:62:100-1:0 T:62:100-1:0 T:43:90-16:75 A:36:100-20:60 A:29:100-20:30 A:22:95-20:0	tctcagctaaatcaatacccca	56.597	Temperature too low;	agcaagtttcaagtttcaatca	55.034	Temperature too low;
S14_26224294	C	4	5.67802e-17	1	0	C	3	CAGCCAAGCC	10	100	AGCCCTTGCCCAACCTGCCACTTTTACACCCCAAAGTTTCGCTTGGTGTGGCT	53	95	T	1	CAGCCAAGCC	10	100	AGCCCTTGCCCAACCTGCCACTTTTACACCCCAAAGTTTCGCTTGGTGTGGCT	53	95	64M; 64M; 64M; 64M;	C:10:100-53:95 C:10:100-53:95 C:10:100-53:95 T:10:100-53:95	gccgtggaggggcagccaagcc	72.585	Temperature too high; Hairpin stability too high;	agcggcaggttgggcaagggct	71.577	Temperature too high;
S14_26231360	G	3	3.41475e-17	1	5	G	2	CAGCAATAG	9	0	GAGGGAATCCCCATAATGGGTTGGGCAAAGCAATAGGAACTCAAGGAACAACAG	54	100	A	1	CAGCAATAG	9	0	GAGGGAATCCCCATAATGGGTTGGGCAAGGCAATAGGAACTCAAGGAACAACAG	54	95	64M; 64M; 64M;	A:9:0-54:95 G:9:0-54:95 G:9:0-54:100	gtagactacaaagcagcaatag	54.689	Temperature too low;	aacccattatggggattcccgc	62.753	Hairpin stability too high;
S14_26231389	A	3	3.41475e-17	1	0	A	2	CAGCAATAGGGAGGGAATCCCCATAATGGGTTGGGCAA	38	100	GCAATAGGAACTCAAGGAACAACAG	25	100	G	1	CAGCAATAGAGAGGGAATCCCCATAATGGGTTGGGCAA	38	100	GCAATAGGAACTCAAGGAACAACAG	25	100	64M; 64M; 64M;	G:38:100-25:100 A:38:100-25:100 A:38:100-25:100	atccccataatgggttgggcaa	62.062	Hairpin stability too high;	ttgttccttgagttcctattgc	56.617	Temperature too low;
S14_26236443	G	4	1.18387e-21	1	0	G	2	CTGCAGGAATGGG	13	100	TTGATTGAGCTTAGGAGGATTGAGGCTTCAAGGGAGATTGCAG	43	100	A	2	CTGCAGGAATGGG	13	100	TTGATTGAGCTTAGGAGGATTGAGGCTTCAAGGGAGATTGCAG	43	100	57M; 57M; 57M; 57M;	A:13:100-43:100 G:13:100-43:100 G:13:100-43:100 A:13:100-43:100	ccactgctgctgcaggaatggg	66.232	Temperature too high; Hairpin stability too high;	caatcctcctaagctcaatcaa	55.867	Temperature too low;
S14_26240942	T	4	1.36266e-20	1	5	T	2	CTGCAAATG	9	0	GCACATGGGAAGTGGGAAGTTCAAGCAAATTTTCCTTTATCTTACTTGATGGCAG	55	100	C	2	CTGCAAATG	9	0	GCACATGGGAAGTGGGAAGTTCAAGCAAATTTTCCTTTATCTTACTTGATGGCAG	55	100	64M; 64M; 64M; 64M;	C:9:0-54:100 T:9:0-54:100 T:8:0-55:100 C:8:0-55:100	ttaataagaatagctgcaaatg	50.668	Temperature too low;	gaacttcccacttcccatgtgc	61.718
S14_26297876	T	4	2.20155e-19	1	0	T	3	GTGAAGAATCAAAGATCATTGGGGAATAAAGGAACCCCAACAGTCT	46	100	GCATAGAGCCGTGGCAG	17	100	C	1	GTGAAGCATCAAAGATCATTGGGGAATAAAGGAAACCCAACAGTCT	46	100	GCATAGAGCCGTGGCAG	17	100	64M; 64M; 64M; 64M;	T:46:95-17:100 T:46:100-17:100 T:46:100-17:100 C:46:100-17:100	aataaaggaaacccaacagtct	55.526	Temperature too low;	acaagctgccacggctctatgc	65.681	Temperature too high;
S14_26346680	C	3	3.1688e-16	1	2	C	2	CTGCAAACAAAGCTCCACCCATGAAAAACAAGTAA	35	100	CCCAAATTGAACTATAGGCCAAGTGAAA	28	100	C	2	CTGCAAACAAAGCTCCACCCATGAAAAACAAGTAA	35	100	CCCAAATTGAACTATAGGCCAAGTGAAA	28	100	35M1D29M; 64M; 64M;	C:35:100-28:100 C:35:100-28:100	tccacccatgaaaaacaagtaa	56.091	Temperature too low;	ttggcctatagttcaatttggg	56.373	Temperature too low;
S14_26354333	A	2	1.54985e-17	1	5	A	1	CAGCTGAGGG	10	100	GGTCGATTTACTTCTGTAGCAGATCTGCCCCAGGACAATCATATCCCAAGCAG	53	85	C	1	CAGCTGAGGG	10	100	GGTCGATTTACTTCTGTAGCAGATCTGCCCCAGGACAATCATATCCCAAGCAG	53	85	64M; 64M;	A:10:100-53:85 C:10:100-53:85	aaagcaaaggtgcagctgaggg	63.878	Temperature too high; Hairpin stability too high;	ctgctacaggagtaaatcgtct	57.359
S14_26362253	A	2	3.41256e-19	1	5	A	1	CTGCTA	6	0	ATAAAAGTGTTTTTTAGGCTTAAAGATATTGTTTTGTGATCTCATCGTCATTCAATG	57	95	C	1	CTGCTA	6	0	ATAAAAGTGTTTTTTAGGCTTAAAGATATTGTTTTGTGATCTCATCATCATTCAATG	57	95	64M; 64M;	A:6:0-57:95 C:6:0-57:95	ggaatgtcatgcttcgctgcta	61.317		taagcctaaaaaacacttttgt	52.689	Temperature too low; Contains too-long poly nucleotide tract;
S14_26362300	A	4	1.84717e-20	1	0	A	2	CTGCTACATAAAAGTGTTTTTTAGGCTTAAAGATATTGTTTTGTGATCTCATC	53	100	TCATTCAATG	10	100	G	2	CTGCTAAATAAAAGTGTTTTTTAGGCTTAAAGATATTGTTTTGTGATCTCATC	53	100	TCATTCAATG	10	100	64M; 64M; 64M; 64M;	G:53:100-10:100 A:53:100-10:100 A:33:100-30:90 G:33:100-30:90	gatattgttttgtgatctcatc	51.098	Temperature too low;	ctttctcaacctcattgaatga	54.382	Temperature too low;
S14_26362316	G	2	4.79451e-17	1	3																	64M; 64M;	T:49:95-14:100 A:49:90-14:100	ctcatcatcattcaatgaggtt	54.228	Temperature too low;	aacacaagcagcaccactttct	61.207
S14_26362346	A	8	5.15426e-23	2	3																	64M; 64M; 41M9D18M; 64M; 41M9D18M; 64M; 64M; 64M;	C:18:100-45:100 G:18:100-45:95 G:18:100-45:100 G:14:100-49:100 C:14:100-49:100 G:14:100-49:95	ggtgctgcttgtgtttcataag	58.431		aaaatgagaggctagtgagact	56.555	Temperature too low; Hairpin stability too high;
S14_26362864	T	3	6.37581e-20	1	0	T	1	TATGATCCTGAAGCCTGTATTGGATCA	27	95	TGAATTATCCCAAGCCAGCTTTATGACAGATGGCTG	36	95	G	2	CAGCCTGATGTTGATGCATATGATCCTGAAGCCTGTATTGGATCA	45	95	TGAATTATCCCAAGCCAGCTTTATGACAGATGGCTG	36	95	64M; 64M; 64M;	G:45:95-18:94 T:27:95-36:95 G:27:95-36:95	tcctgaagcctgtaatggatca	58.885		aaagctggcttgggatagttca	59.958
S14_26382754	G	2	2.44608e-16	1	0	G	1	CTGCATTATATGGGTATT	18	100	TACTTCACTTTTATGATTATCTATGCCGAAGTGTTCTTCTACCTT	45	100	A	1	CTGCATTATATGGGTATT	18	100	TACTTAACTTTTATGATTATCTATGCTGAAGTGTTCTTCTACCTT	45	95	64M; 64M;	A:18:100-45:95 G:18:100-45:100	gttgctgcattatatgggtatt	54.627	Temperature too low;	agataatcataaaagtgaagta	48.039	Temperature too low;
S14_26382760	C	2	2.44608e-16	1	0	C	1	CTGCATTATATGGGTATTGTACTT	24	100	ACTTTTATGATTATCTATGCCGAAGTGTTCTTCTACCTT	39	100	A	1	CTGCATTATATGGGTATTATACTT	24	95	ACTTTTATGATTATCTATGCTGAAGTGTTCTTCTACCTT	39	100	64M; 64M;	A:24:95-39:100 C:24:100-39:100	gcattatatgggtattgtactt	51.473	Temperature too low;	tggcatagataatcataaaagt	50.71	Temperature too low;
S14_26382781	C	2	2.44608e-16	1	0	C	1	CTGCATTATATGGGTATTGTACTTCACTTTTATGATTATCTATGC	45	100	GAAGTGTTCTTCTACCTT	18	94	T	1	CTGCATTATATGGGTATTATACTTAACTTTTATGATTATCTATGC	45	100	GAAGTGTTCTTCTACCTT	18	94	64M; 64M;	T:45:100-18:94 C:45:100-18:94	tcacttttatgattatctatgc	49.566	Temperature too low;	tatcaaggtagaagaacacttt	52.477	Temperature too low;
S14_26384931	T	4	9.45797e-16	1	5	T	1	TGAACTAAC	9	0	CGGCCAAAATTTCTGACTCCTGATAGTATACAAGCTGAGGAGGCTGTACAGCAG	54	100	C	3	TGAACTAAC	9	0	TGGCCAAAATTTCTGACTCCTGATAGTATACAAGCTGAGGAGGCTGTACAGCAG	54	100	64M; 64M; 64M; 64M;	C:9:0-54:95 T:9:0-54:100 C:9:0-54:100 C:9:0-54:100	gtaaaacttttgctgaactaac	52.283	Temperature too low;	caggagtcagaaattttggccg	60.095
S14_26419950	T	4	1.41551e-16	2	0	T	3	TTTCAGTCTGTTTTGAAGTACGATTCTGAGAGCTAGCTTTTCGGCTAGGT	50	95	TTGCATTTAGCTG	13	100	A	1	TTTCAGTCTGTTTTGAAGTATCATTCTGAGAGCTAGCTTTTCGGCTAGGT	50	95	TTGCATTTAGCTG	13	100	64M; 64M; 64M; 64M;	T:50:95-13:100 T:50:95-13:100 A:50:95-13:100 T:50:95-13:92	agagctagcttttaggctaggt	58.351	Hairpin stability too high;	aacccacagcagctaaatgcaa	61.343	Hairpin stability too high;
S14_26419952	T	4	5.75353e-17	1	0	T	3	TTTCAGTCTGTTTTGAAGTACGATTCTGAGAGCTAGCTTTTCGGCTAGGTTT	52	95	GCATTTAGCTG	11	100	C	1	TTTCAGTCTGTTTTGAAGTATCATTCTGAGAGCTAGCTTTTCGGCTAGGTTT	52	95	GCATTTAGCTG	11	100	64M; 64M; 64M; 64M;	T:52:95-11:100 T:52:95-11:100 T:52:90-11:100 C:52:95-11:100	agctagcttttaggctaggttt	57.154	Hairpin stability too high;	caaacccacagcagctaaatgc	60.928
S14_26420309	T	4	1.90031e-16	1	0	T	3	CAGCTGGACTCTGGATGGA	19	100	ACGTCACTCTCAATTGTTGGTGGTTCTGGGCCTGTCTAAAATGC	44	100	C	1	CTGCTGGACTCTGGATGGA	19	95	ACGTCACTCTCAATTGTTGGTGGTTCTGGGCCTGTCTAAAATGC	44	100	64M; 64M; 64M; 64M;	T:19:89-44:100 T:19:100-44:100 C:19:95-44:100 T:19:95-44:100	atgctgctggactctggataga	60.692		caccaacaattgagagtgacgt	59.128
S14_26444867	C	3	1.91299e-21	2	0	C	1	CGTCACCAATA	11	100	TTTAATCCGTGGCACTAAGATAACGCCTA	29	95	T	2	CGTCACCAATA	11	100	TTTAATGCGTGGCACTAAGATAACGCCTA	29	100	23S41M; 23S41M; 29S35M;	C:11:100-29:95 T:11:100-29:100 T:11:100-23:100	tctctccgctgcgtcaccaata	63.729	Temperature too high;	tatcttagtgccacgcattaaa	55.897	Temperature too low;
S14_26444874	G	5	1.91299e-21	2	0	G	2	CGTCACCAATATTTTAAT	18	94	CGTGGCACTAAGATAACGCCTA	22	100	C	1	CGTCACCAATACTTTAAT	18	100	CGTGGCACTAAGATAACGCCTA	22	100	23S41M; 23S41M; 29S35M; 28M3D20M16S; 28M3D20M16S;	C:18:100-22:100 G:18:94-22:100 G:18:94-16:100	gctgcgtcaccaatactttaat	57.384		taggcgttatcttagtgccacg	60.224	Hairpin stability too high;
S14_26444877	T	5	4.12538e-18	1	2	T	3	CGTCACCAATACTTTAATCCG	21	95	GGCACTAAGATAACGCCTA	19	100	T	3	CGTCACCAATACTTTAATCCG	21	95	GGCACTAAGATAACGCCTA	19	100	23S41M; 23S41M; 29S35M; 28M3D20M16S; 28M3D20M16S;	T:21:95-19:100 T:21:95-19:100 T:21:95-13:100	gcgtcaccaatactttaatgcg	58.649		tactaggcgttatcttagtgcc	57.157
S14_26490893	C	3	2.81798e-20	1	5	C	2	CTGCAT	6	0	TCTCCCTGTCTTTTGTTTGATGATATGCAAGCAAAATGTCTCGGAAGGACAATTATA	57	100	G	1	CTGCAT	6	0	TCTCCCTGTCTTTTGTTTGATGATATGCAATCAAAATGTCTCGGAAGGACAATTATA	57	100	64M; 64M; 64M;	C:6:0-57:100 C:6:0-57:100 G:6:0-57:100	gttagacccctgactgctgcat	62.326		catcaaacaaaagacagggaga	56.546	Temperature too low;
S14_26491026	C	3	3.64103e-16	1	4	C	1	TGTTTGATGACATGCAGAAAACTTGATGTTTTACCTGGATAATTGAGTTCT	51	100	TGCCCC	6	0	A	2	CTGCTTTGTTTGATGACATGCAGAAAACTTGATGTTTTACCTGGATAATTG	51	100	GTTCTCCCTGTC	12	100	64M; 64M; 58M6S;	A:51:100-12:100 A:51:100-12:92 C:51:100-6:0	tgatgttttacctggataattg	52.163	Temperature too low;	ggggggcagagacagggagaac	66.302	Temperature too high; Contains too-long poly nucleotide tract;
S14_26491028	-	3	3.64103e-16	1	3																	64M; 64M; 58M6S;	T:53:100-10:100 T:53:100-10:90 G:53:95-4:0	atgttttacctggataattgag	51.871	Temperature too low;	gaggggggcagagacagggaga	66.941	Temperature too high; Contains too-long poly nucleotide tract;
S14_26491030	C	5	3.64103e-16	1	2	C	4	CTGCTTTGTTTGATGACATGCAGAAAACTTGATGTTTTACCTGGATAATTGAGTT	55	100	TCTCTGTCTCTGCCCCCCTCCCCCCTCTTGTTTGATGATGTGCAAACATAATCTCTTGGCAG	62	95	C	4	CTGCTTTGTTTGATGACATGCAGAAAACTTGATGTTTTACCTGGATAATTGAGTT	55	100	TCTCTGTCTCTGCCCCCCTCCCCCCTCTTGTTTGATGATGTGCAAACATAATCTCTTGGCAG	62	95	64M; 64M; 58M6S; 64M; 20M1I43M;	C:55:100-8:0 C:55:100-8:0 C:55:85-2:0 C:1:0-62:95	gttttacctggataattgagtt	52.094	Temperature too low;	gggaggggggcagagacaggga	69.287	Temperature too high; Contains too-long poly nucleotide tract;
S14_26491036	G	4	4.6343e-18	1	2	G	3	CTGCTTTGTTTGATGACATGCAGAAAACTTGATGTTTTACCTGGATAATTGAGTTCTCCCT	61	100	TCTCTGCCCCCCTCCCCCCTCTTGTTTGATGATGTGCAAACATAATCTCTTGGCAG	56	100	G	3	CTGCTTTGTTTGATGACATGCAGAAAACTTGATGTTTTACCTGGATAATTGAGTTCTCCCT	61	100	TCTCTGCCCCCCTCCCCCCTCTTGTTTGATGATGTGCAAACATAATCTCTTGGCAG	56	100	64M; 64M; 64M; 20M1I43M;	G:61:100-2:0 G:61:95-2:0 G:7:0-56:100	cctggataattgagttctccct	56.944	Temperature too low;	agaggggggaggggggcagaga	70.327	Temperature too high; Contains too-long poly nucleotide tract;
S14_26491037	T	5	4.6343e-18	1	2	T	4	CTGCTTTGTTTGATGACATGCAGAAAACTTGATGTTTTACCTGGATAATTGAGTTCTCCCTG	62	100	CTCTGCCCCCCTCCCCCCTCTTGTTTGATGATGTGCAAACATAATCTCTTGGCAG	55	100	T	4	CTGCTTTGTTTGATGACATGCAGAAAACTTGATGTTTTACCTGGATAATTGAGTTCTCCCTG	62	100	CTCTGCCCCCCTCCCCCCTCTTGTTTGATGATGTGCAAACATAATCTCTTGGCAG	55	100	64M; 64M; 64M; 20M1I43M; 8S56M;	T:62:100-1:0 T:62:95-1:0 T:8:0-55:100 T:0:0-55:95	ctggataattgagttctccctg	55.955	Temperature too low;	aagaggggggaggggggcagag	69.365	Temperature too high; Contains too-long poly nucleotide tract;
S14_26491051	C	3	3.64103e-16	1	2	C	2	TCTCTCTGTCTCTGCCCCCCTC	22	100	CCCCTCTTGTTTGATGATGTGCAAACATAATCTCTTGGCAG	41	100	C	2	TCTCTCTGTCTCTGCCCCCCTC	22	100	CCCCTCTTGTTTGATGATGTGCAAACATAATCTCTTGGCAG	41	100	64M; 20M1I43M; 8S56M;	C:22:95-41:100 C:14:100-41:95	tctccctgtctctgcccccctc	66.941	Temperature too high; Contains too-long poly nucleotide tract;	gcacatcatcaaacaagagggg	59.835
S14_26502324	T	3	2.20155e-19	1	0	T	2	TTGGTGGGGAAATGGTTGAGGAAGTTAATGGTGATAATGGTGA	43	100	TGTAGCTCAAATCCCAGCAG	20	100	C	1	TTGATGGGGAAATGGTTGAGGAAGTTAATGGTGATAATGGTGA	43	100	TGTAGCTCAAATCCCAGCAG	20	100	64M; 64M; 64M;	T:43:100-20:100 T:43:100-20:100 C:43:100-20:100	aagttaatggtgataatggtga	53.127	Temperature too low;	tgctgctgggatttgagctaca	62.27
S14_26532422	C	14	5.15426e-23	1	0	C	11	CTGCTCCCAGCATG	14	100	GCCTCCCGCCTCAGCCGGGCCCCTCCCCATCCTTCTTCTGCTG	43	100	T	3	CTGCTCCCAGCATG	14	100	GCCTCCTGCCTCAGCCGGGCCCCTCCCCATCCTTCTTCTGCTG	43	100	58M; 58M; 58M; 58M; 58M; 58M; 58M; 58M; 58M; 58M; 58M; 58M; 58M; 58M;	C:14:100-43:95 C:14:100-43:100 T:14:100-43:100 T:14:100-43:100 C:14:100-43:100 C:14:93-43:100 C:14:100-43:95 T:14:100-43:95 C:14:100-43:95 C:14:100-43:95 C:14:93-43:95 C:14:100-43:90 C:14:100-43:90 C:14:93-43:90	cccttatgctgctcccagcatg	63.606	Temperature too high; Hairpin stability too high;	gggcccggctgaggcaggaggc	73.855	GC content too high; Temperature too high; Hairpin stability too high;
S14_26682786	T	2	4.3563e-23	2	0	T	1	CAGCACCCGAAAGTGA	16	100	GTACTTCTCCATGATCTGGAGGCACTCTGGGCACCTGATCTTCTCTG	47	100	C	1	CAGCACCCGAAAGTGA	16	100	GTACTTCTCCATGATCTGGAGGCACTCTGGGCACCTGATCTTCTCTG	47	100	64M; 64M;	C:16:100-47:100 T:16:100-47:100	tcatggcagcacccgaaagtga	64.74	Temperature too high;	cctccagatcatggagaagtac	57.401	Hairpin stability too high;
S14_26764455	T	3	3.33378e-20	1	5	T	2	GAAATCAAAATCTGTAAATGGGGTTGTTGAAAAATCGAAGAATCCCAGCAACGATC	56	100	GAAGCAG	7	0	C	1	GAAATCAAAATCTGTAAATGGGGTTGTTGAAAAATCGAAGAATACCAGCAACGATC	56	100	GAAGCAG	7	0	64M; 64M; 64M;	T:56:95-7:0 T:56:100-7:0 C:56:100-7:0	tcgaagaataccagcaacgatc	58.555		ctaaccatgaagaagctgcttc	57.387
S14_26788064	T	4	5.15426e-23	2	5	T	3	CAACGTATGTTAGTGCGGCTTCTGGGAGGTCCGCCCTTAGCTTGGCCACTGCTTCCT	57	100	GAGCTG	6	0	C	1	CAACGTATGTTAGTGCGGCTTCTGGGAGGTCCGCCCTTAGCTTGACCACTGCTTCCT	57	100	GAGCTG	6	0	64M; 64M; 64M; 64M;	T:57:95-6:0 T:57:95-6:0 T:57:100-6:0 C:57:100-6:0	cttagcttgaccactgcttcct	60.29		catggaattcaataagcagctc	55.832	Temperature too low;
S14_26852239	A	8	6.58596e-18	1	5	A	5	CAGCAATTAAACAATATCATTATCTAATA	29	100	TTTGGGAATTTATACGGATAGACCAGTTCGTTCTCAAATGATAGACCATACGATGCTG	58	100	T	1	TTTATA	6	0	GGATAGACCAGTTCGTTCTCAAATGATGCCATACAATTGCTG	42	100	64M; 64M; 64M; 64M; 49M15S; 64M; 64M; 64M;	A:29:100-34:100 A:29:100-34:95 A:29:100-34:90 C:29:100-34:85 T:6:0-42:100 A:5:0-58:100 A:5:0-58:90 C:5:0-58:85	taaacaatatcattatctaata	43.243	GC content too low; Temperature too low;	tctatccgtataaattcccaaa	52.388	Temperature too low;
S14_26852246	A	8	6.58596e-18	1	5	A	6	CAGCAATTAAACAATATCATTATCTAATAATTTGGG	36	100	ATTTATACGGATAGACCAGTTCGTTCTCAAATGATAGACCATACGATGCTG	51	100	G	2	CAGCAATTAAACAATATCATTATCTAATACTTTGGG	36	95	ATTTATATGCATAGACCAGTTTGTTCTCAAATGATAGACCATACAATGCTG	51	90	64M; 64M; 64M; 64M; 49M15S; 64M; 64M; 64M;	A:36:100-27:100 A:36:100-27:95 A:36:100-27:90 G:36:95-27:90 A:13:92-35:100 A:12:100-51:100 A:12:100-51:90 G:12:92-51:90	tatcattatctaataatttggg	46.561	Temperature too low;	gaactggtctatccgtataaat	52.913	Temperature too low;
S14_26852256	G	8	6.58596e-18	1	3																	64M; 64M; 64M; 64M; 49M15S; 64M; 64M; 64M;	G:46:100-17:100 G:46:95-17:100 G:46:95-17:88 C:46:85-17:94 T:23:95-25:50 G:22:100-41:100 G:22:95-41:90 C:22:85-41:95	taataatttgggaatttatacg	47.824	Temperature too low;	atttgagaacgaactggtctat	55.202	Temperature too low;
S14_26857330	T	4	1.4042e-17	1	0	T	3	GTATTAGATCATC	13	92	CATGTCTGATTCATCCAAACCAAGCCTGTAAACTGAATGATTATATGCTG	50	100	A	1	GTATTAGACCATC	13	92	CATGTCTGATTCATCCAAACCAAGCCTGTAAACAGAATGATAATATGCTG	50	100	64M; 64M; 64M; 64M;	T:13:85-50:100 T:13:85-50:100 T:13:92-50:100 A:13:92-50:100	aagaccattatattagaccatc	50.55	Temperature too low;	tggtttggatgaatcagacatg	56.676	Temperature too low;
S14_26867421	G	5	1.16177e-21	1	0	G	3	CAGCTCCCAATTTGTTTACCCATCTCCCTCTTGTTTTGTTTGATTCTCTTTGTTCTTTCCTTC	63	100	GTTTCATCATTTTGGTGACTAACGAAAATGGTGGATGGGCAG	42	100	C	2	CAGCTCCCAATTTGTTTACCCATCTCCCTCTTGTTTTGTTTGATTCTCTTTGTTCTTTCCTTC	63	100	TTTTCATCATTTTGGTGACTAACGAAAATGGTGGATGGGCAG	42	100	64M; 64M; 64M; 64M; 16S48M;	C:63:100-0:0 G:63:100-0:0 C:21:100-42:100 G:21:100-42:95 G:5:0-42:100	gattctctttgttctttccttc	53.087	Temperature too low;	ttagtcaccaaaatgatgaaaa	52.199	Temperature too low;
S14_26867422	T	3	2.26658e-18	1	0	T	2	ATTCTCTTTGTTCTTTCCTTCC	22	95	TTTCATCATTTTGGTGACTAACGAAAATGGTGGATGGGCAG	41	100	G	1	ATTCTCTTTGTTCTTTCCTTCG	22	100	TTTCATCATTTTGGTGACTAACGAAAATGGTGGATGGGCAG	41	100	64M; 64M; 16S48M;	T:22:95-41:100 G:22:100-41:100 T:6:0-41:100	attctctttgttctttccttcg	54.689	Temperature too low;	gttagtcaccaaaatgatgaaa	52.964	Temperature too low;
S14_26916811	G	4	2.20155e-19	1	0	G	3	CAGCTGAATCCACACATAACATG	23	100	AATTGTAATCCTCATCCCCCATATCTGGAAGAGCCTTGGC	40	95	A	1	CAGCTGAATCCACACATAACATG	23	100	TATTGTAATCCTCATCCCCCATATCTGGAAGAGCCTTGGC	40	95	64M; 64M; 64M; 64M;	A:23:100-40:95 G:23:100-40:90 G:23:100-40:95 G:23:100-40:95	agctgaatccacacataacatg	56.759	Temperature too low;	atgggggatgaggattacaaaa	57.102
S14_26923432	T	2	3.58031e-17	2	0	T	1	TTCCGCAATATGC	13	100	GTCAGATGACATTCAACCTGATGCTGTTGCTGTGGTGAAGATTCTAGCAG	50	95	G	1	TTCCGCAATATGC	13	100	GTCAGATGACATTCAACCTGATGCTGTTGCTGTGGTGAAGATTCTAGCAG	50	95	64M; 64M;	T:13:100-50:95 G:13:100-50:95	atgggggtgttccgcaatatgc	63.564	Temperature too high; Hairpin stability too high;	atcaggttgaatgccatctgac	58.715
S14_26954479	T	6	4.28823e-19	1	0	T	1	CAGCCACTGATCTGGGTGGATTGA	24	100	TGGTAGGCAGAGGCACAAGTTGGCTGAGAGAGGAGTGGT	39	100	G	5	CAGCCACTGATCTGGGTGGATTGA	24	100	TGGTAGGCAGAGGCACAGGTTGGCTGAGAGAGGAGAGGT	39	95	64M; 64M; 64M; 64M; 64M; 64M;	G:24:100-39:95 G:24:100-39:95 G:24:100-39:95 G:24:100-39:95 G:24:100-39:95 T:24:100-39:100	gccactgatctgggtggattga	62.337	Hairpin stability too high;	caacttgtgcctctgcctacca	62.774
S14_26954497	A	6	4.28823e-19	1	0	A	1	CAGCCACTGATCTGGGTGGATTGATTGGTAGGCAGAGGCACA	42	100	GTTGGCTGAGAGAGGAGTGGT	21	95	G	5	CAGCCACTGATCTGGGTGGATTGAGTGGTAGGCAGAGGCACA	42	95	GTTGGCTGAGAGAGGAGAGGT	21	95	64M; 64M; 64M; 64M; 64M; 64M;	G:42:95-21:90 G:42:95-21:90 G:42:95-21:90 G:42:95-21:95 G:42:95-21:95 A:42:100-21:95	ttgattggtaggcagaggcaca	61.951		aaccactcctttctcagccaac	60.75
S14_26954543	T	4	1.84717e-20	1	0	T	1	AGAGGAGTGGTTCCTCCTCTGCTTTCCATGCTTCA	35	100	TCTCAAGATTTTGAGGCTGTTGAGGCTG	28	100	C	3	AGAGGAGTGGTTCCTCCTCTGCTTTCCATGATTCC	35	100	TCTCAAGATTTTGAGGCTGTTGAGGCTG	28	100	64M; 64M; 64M; 64M;	T:35:100-28:100 C:35:90-28:100 C:35:100-28:100 C:35:95-28:100	ctcctctgctttccatgcttca	60.617		caacagcctcaaaatcttgaga	56.894	Temperature too low; Hairpin stability too high;
S14_26955074	C	8	5.15426e-23	1	3																	64M; 64M; 64M; 64M; 64M; 64M; 64M; 64M;	A:58:95-5:0 G:58:95-5:0 T:58:95-5:0 C:58:90-5:0 C:58:100-5:0 T:46:95-17:100 C:46:90-17:100 C:46:100-17:100	tcagtggagacaacaccggagg	63.884	Temperature too high; Hairpin stability too high;	tcatgctgctaccattgttatc	56.567	Temperature too low;
S14_26955129	T	2	5.15426e-23	1	0	T	1	CAGCATGAGTATGCAGGCCAAACTCGATGCCATATCCACA	40	100	TCCAAAACCTCTCAACTTGCCAT	23	100	G	1	CAGCATGAGTATGCAGGCCAAACTCGATGCCATATCCACA	40	100	TCCAAAACCTCTCAACTTGCCAT	23	100	64M; 64M;	G:40:100-23:100 T:40:100-23:100	caaactcgatgccatatccaca	58.795		tggcaagttgagaggttttgga	60.358
S14_27052970	A	9	1.36266e-20	1	0	A	7	CTGCTTTTGTCCCCCGCTGAGTAGATGATCATCTATAATAGT	42	100	TCATAACCATCAGGAAGAGATGAGATGAATCCATGAGCATAGGCCAGCTTTGCAG	55	100	G	2	CTGCTTTTGTCCCCCGCTGAGTAGATGATCATCTATAATAGT	42	100	TCATAACCATCAGGAAGAGATGAGATGAATCCATGAGCATAGGCCAGCTTTGCAG	55	100	64M; 64M; 64M; 64M; 64M; 64M; 64M; 64M; 64M;	A:42:100-21:100 G:42:100-21:100 A:42:95-21:100 G:8:0-55:100 A:8:0-55:100 A:8:0-55:100 A:8:0-55:100 A:8:0-55:100 A:8:0-55:100	gtagatgatcatctataatagt	47.298	Temperature too low; Hairpin stability too high;	catctcttcctgatggttatga	55.053	Temperature too low;
S14_27069614	A	6	4.04509e-16	1	5	A	3	CTGCTCTGTTCCCTATTCTGTGTTATTGGATTATTGG	37	100	TACCTGCATAGGAGAGTTTTCTTGATTGGATAACCACATTGTGGGTGTTTATTCCTGGCAG	61	100	G	1	GG	2	0	TACCTGCATAGGAGAGTTTTCTTGATTGGATAAACACATTGTGGGTGTTTATTCCTGGCAG	61	100	64M; 18M1D46M; 38M8I18M; 64M; 64M; 64M;	A:37:100-26:100 A:2:0-61:100 G:2:0-61:100 A:2:0-61:100	ttctgtgttattggattattgg	52.163	Temperature too low;	agaaaactctcctatgcaggta	56.273	Temperature too low;
S14_27072996	T	2	1.39459e-16	2	0	T	1	TCCCCAAAGTC	11	100	GCTGATGATGAGCGTAGAAACATCCTTCGATCTTGGAAATGGCTTTATGCAG	52	95	C	1	TCCCCAAAGTC	11	100	GCTGATGATGAGCGTAGAAACATCCTTCGATCTTGGAAATGGCTTTATGCAG	52	95	64M; 64M;	T:11:100-52:95 C:11:100-52:95	accctacgtcttccccaaagtc	61.676		tgtttctatgctcatcatcagc	56.58	Temperature too low;
S14_27085079	G	3	9.38648e-17	2	3																	64M; 64M; 64M;	A:5:0-58:100 A:5:0-58:100 T:5:0-58:100	ttttggcgggaaacacgctgcg	67.324	Temperature too high; Hairpin stability too high;	agtttcaaactttggattcatt	52.718	Temperature too low;
S14_27100557	G	6	1.18387e-21	2	0	G	4	CAGCACAGTATGGATTGGAGAAGAAACAGTTGA	33	100	CTCAGCTGTCAAGAGGATGAAGATGGACAAAATGGTACAGAGAAAGCAG	49	100	A	2	CAGCACGGTATGGATTGGAGAAGAAACAGTTGA	33	100	CTCAGCTGTCAAGAGGATGAAGATGGACAAAATGGTACAGAGAAAGCAG	49	100	64M; 64M; 64M; 64M; 64M; 64M;	G:33:95-30:100 A:33:95-30:100 G:33:90-30:100 G:14:100-49:100 A:14:100-49:100 G:14:93-49:100	ggattggggaagaaacagttga	58.504		cttcatcctcttgacagctgag	58.476
S14_27105781	G	3	7.44508e-17	2	0	G	2	CTGCAGAAGAAC	12	100	TGAAAACATCAAAGAACTGATCATAGAGAAAGAGAGAGATATCAAAGAATT	51	100	A	1	CTGCAGAAGAAC	12	100	TGAAAACATCAAAGAACTGATCATAGAGAAAGAGAGAGATATCAAGGAATT	51	100	64M; 64M; 64M;	A:12:100-51:100 G:12:100-51:100 G:12:100-51:100	gctgagaaagctgcagaagaac	60.096	Hairpin stability too high;	gatcagttctttgatgttttca	52.99	Temperature too low;
S14_27118379	G	10	1.18387e-21	2	0	G	8	CTGCACTGGTTTAGCCACTGATATTCGGTCGTGCCAAA	38	100	CAGGGGTGTCAAGGTCATGTTGTCGATTGGGGGCGGGGATGGCAG	45	100	A	2	CTGCACTGGTTTAGCCACTGATATTCGGTCGTGCCAAA	38	100	CAGGGGTGTCAGGGTCATGTTGTCGATTGGGGGCGGGGATGGCAG	45	95	64M; 64M; 64M; 64M; 64M; 64M; 64M; 64M; 64M; 64M;	A:38:100-25:95 G:38:100-25:95 G:38:100-25:95 G:38:100-25:95 G:38:100-25:95 G:38:100-25:100 G:38:95-25:100 A:18:100-45:95 G:18:94-45:100 G:18:100-45:100	actgatattcggtcgtgccaaa	60.354		caacatgaccttgacacccctg	61.395
S14_27118391	A	10	1.18387e-21	2	0	A	8	CTGCACTGGTTTAGCCACTGATATTCGGTCGTGCCAAAGCAGGGGAGTCA	50	100	GGTCATGTTGTCGATTGGGGGCGGGGATGGCAG	33	100	G	2	CTGCACTGGTTTAGCCACTGATATTCGGTCGTGCCAAAACAGGGGTGTCA	50	95	GGTCATGTTGTCGATTGGGGGCGGGGATGGCAG	33	100	64M; 64M; 64M; 64M; 64M; 64M; 64M; 64M; 64M; 64M;	G:50:95-13:100 A:50:95-13:100 A:50:95-13:100 A:50:95-13:100 A:50:100-13:92 A:50:100-13:100 A:50:95-13:100 G:30:95-33:100 A:30:95-33:100 A:30:100-33:100	tcgtgccaaagcaggggtgtca	66.904	Temperature too high; Hairpin stability too high;	gcccccaatcgacaacatgacc	64.03	Temperature too high;
S14_27118721	G	3	7.1159e-18	2	0	G	2	CAGCACCCCA	10	100	TGTCCCTTTCCTGATGTATACATGGGGCAGGCCTTGTCCAGTGGCCTCTTTGA	53	100	C	1	CAGCACCCCA	10	100	TGTCCCTTTCCTGATGTATACATGGGGCAGGCCTTGTCCAGTGGCCTCTTTGA	53	100	64M; 64M; 64M;	C:10:100-53:100 G:10:100-53:100 G:10:100-53:95	tgtgtctgactgcagcacccca	66.347	Temperature too high;	tgtatacatcaggaaagggaca	56.261	Temperature too low;
S14_27118778	T	2	4.12138e-18	1	0	T	1	GGCCTCTTTGATTA	14	100	GTTTGGATGCAATTCTATAACAATTACTGTGAATACAAAGGAAATGCTG	49	100	C	1	GGCCTCTTTGATTA	14	100	GTTTGGATGCAATTCTATAACAATTACTGTGAATACAAAGGAAATGCTG	49	100	64M; 64M;	T:14:100-49:100 C:14:100-49:100	tgtccagtggcctctttgatta	59.358		tgttatagaattgcatccaaac	52.823	Temperature too low;
S14_27118883	C	12	6.18243e-22	2	0	C	10	CTGCTGAACTGAAAGCAACATGGGACACATGGACTAGCAATGTGACTGCAACAGGGTT	58	100	TTCCTGGGTGTCCCTGCTG	19	100	T	2	CTGCTGAACTGAAAGCAACATGGGATACATGGACTAGCAATGTGACTGCAACAGGGTT	58	100	TTCCTGGGTCTCCCTGCTG	19	100	64M; 64M; 64M; 64M; 64M; 64M; 64M; 64M; 64M; 64M; 64M; 33M;	C:58:100-5:0 C:58:95-5:0 C:58:100-5:0 T:58:100-5:0 C:58:95-5:0 C:44:95-19:95 C:44:95-19:95 T:44:100-19:100 C:44:100-19:100 C:44:100-19:100 C:44:95-19:100 C:13:100-19:100	gcaatgtgactgcaacagggtt	62.168		gtgcagcagggagacccaggaa	66.489	Temperature too high; Hairpin stability too high;
S14_27119601	G	5	5.15426e-23	2	0	G	4	CAGCATCTCCCTTCCTTTAT	20	100	GATATCTCCGCCAATTCCACCTTTCCTTCCCATGATATTCACA	43	100	T	1	CAGCATCTCCTTTCCTTTAT	20	100	GATATCGCCGCCAATTCCACCTCTCCTTCCCATGATATTCACA	43	100	64M; 64M; 64M; 64M; 64M;	G:20:95-43:95 G:20:100-43:100 G:20:100-43:100 G:20:100-43:95 T:20:100-43:100	cgcagcatctcctttcctttat	58.791		aggtggaattggcggcgatatc	63.078	Temperature too high;
S14_27119627	C	14	5.15426e-23	1	0	C	12	CAGCATCTCCCTTCCTTTATGGATATCTCCGCCAATTCCACCTTTC	46	100	TTCCCATGATATTCACAGTATACCCAGCATGTTTCAGTTTGTCATGTGGGCTG	53	100	T	2	CAGCATCTCCTTTCCTTTATGGATATCGCCGCCAATTCCACCTCTC	46	100	TTCCCATGATATTCACAGTATACACAGCATGTTTCAGTTTGTCATGTGGGCTG	53	100	64M; 64M; 64M; 64M; 64M; 64M; 64M; 64M; 64M; 64M; 64M; 64M; 64M; 64M;	C:46:90-17:100 C:46:100-17:100 T:46:100-17:100 C:46:90-17:100 C:46:100-17:100 C:10:100-53:100 T:10:100-53:100 C:10:90-53:100 C:10:90-53:100 C:10:90-53:100 C:10:100-53:100 C:10:90-53:95 C:10:90-53:95 C:10:100-53:100	atcgccgccaattccacctctc	65.203	Temperature too high;	tatactgtgaatatcatgggaa	51.805	Temperature too low;
S14_27119669	T	9	3.69778e-16	2	0	T	8	TCCACCTCTCCTTCCCATGATATTCACAGTATACCCAGCATGTTTCAGTTTG	52	95	CATGTGGGCTG	11	100	C	1	TCCACCTCTCCTTCCCATGATATTCACAGTATACACAGCATGTTTCAGTTTG	52	95	CATGTGGGCTG	11	100	64M; 64M; 64M; 64M; 64M; 64M; 64M; 64M; 64M;	T:52:90-11:100 T:52:95-11:100 T:52:95-11:100 T:52:95-11:100 T:52:95-11:100 T:52:95-11:100 T:52:95-11:100 T:52:90-11:100 C:52:95-11:100	atacacagcatgtttcagtttt	54.831	Temperature too low; Hairpin stability too high;	gatggctacggcagcccacatg	66.053	Temperature too high; Hairpin stability too high;
S14_27170394	T	9	1.14383e-24	1	0	T	5	CAGCGCACTAGGCCTCGCTGTAATCACCCCTCTGTTCCTGATCTTCAGCCC	51	100	GTTTTAGTCCCT	12	100	G	4	CAGCGCACTAGGCCTCGCTGTAATCACCCCTCTGTTCCTGATCTTCAGCCC	51	100	GTTTTAGTCCCT	12	100	64M; 64M; 64M; 64M; 64M; 64M; 64M; 64M; 64M;	G:51:100-12:100 T:51:100-12:100 T:47:100-16:94 T:47:100-16:94 T:47:100-16:94 T:47:100-16:94 G:47:100-16:94 G:47:100-16:94 G:47:100-16:94	ctctgttcctgatcttcagccc	60.42		ctatggtagcagggactaaaac	55.972	Temperature too low;
S14_27213140	A	3	1.8387e-22	1	5	A	3		0	0	CTCAGGCTTGCCAACATGATTCTACCCTGAGATTCGAGCAACTGTTTTGTGAAAAAAATGCAG	63	100	A	3		0	0	CTCAGGCTTGCCAACATGATTCTACCCTGAGATTCGAGCAACTGTTTTGTGAAAAAAATGCAG	63	100	64M; 64M; 64M;	A:0:0-63:100 A:0:0-63:100 A:0:0-63:100	actacttgcctcttgaaaagca	58.179		gaatcatgttggcaagcctgag	60.159
S14_27213199	T	6	1.8387e-22	1	5	T	3	ACTCAGGCTTGCCAACATGATTCTACCCTGAGATTCGAGCAACTGTTTTGTGAAAAAAA	59	100	GCAG	4	0	T	3	ACTCAGGCTTGCCAACATGATTCTACCCTGAGATTCGAGCAACTGTTTTGTGAAAAAAA	59	100	GCAG	4	0	64M; 64M; 64M; 51M1I12M; 51M1I12M; 51M1I12M;	T:59:100-4:0 T:59:100-4:0 T:59:95-4:0	agcaactgttttgtgaaaaaaa	54.348	Temperature too low; Contains too-long poly nucleotide tract;	agccgaaaattacaaatgctgc	58.747
S14_27224830	G	3	1.19876e-16	1	5	G	2	CTGCATGCTCGTGAAATGGCC	21	95	AGTCTTTTCTGAAATTATATGAACCAAAGCTGAAAAAGAAAG	42	95	A	1	CTGCATGCTCGTGAAATGGCC	21	95	AGTTTTTTCTGAAATTATATGAACCAAAGCTGAAAAAGAAAG	42	80	64M; 64M; 64M;	A:21:95-42:80 G:21:95-42:85 G:21:95-42:95	gctgcatgctcgtgaaatggct	64.565	Temperature too high;	tcgaatagtttcagaaaagact	53.183	Temperature too low;
S14_27224834	C	3	1.19876e-16	1	5	C	2	CTGCATGCTCGTGAAATGGCCGAGT	25	95	TTTTCTGAAATTATATGAACCAAAGCTGAAAAAGAAAG	38	95	T	1	CTGCATGCTCGTGAAATGGCCAAGT	25	90	TTTTCTGAAATTATATGAACCAAAGCTGAAAAAGAAAG	38	85	64M; 64M; 64M;	T:25:90-38:85 C:25:95-38:85 C:25:95-38:95	catgctcgtgaaatggctgagt	61.511		tggttcgaatagtttcagaaaa	53.98	Temperature too low;
S14_27224895	C	1	5.23861e-17	2	5	C	1	T	1	0	ATTAGGCAACTGGATGAGGTTACCAGAGTTGCAGGAGATGTGGAGAGAATCAGGGCATGCTG	62	100	C	1	T	1	0	ATTAGGCAACTGGATGAGGTTACCAGAGTTGCAGGAGATGTGGAGAGAATCAGGGCATGCTG	62	100	64M;	C:1:0-62:100	gaaatgatcaaatggtgtcact	54.988	Temperature too low;	taacctcatccagttgcctaat	56.867	Temperature too low;
S14_27224896	A	1	5.23861e-17	2	5	A	1	TC	2	0	TTAGGCAACTGGATGAGGTTACCAGAGTTGCAGGAGATGTGGAGAGAATCAGGGCATGCTG	61	100	A	1	TC	2	0	TTAGGCAACTGGATGAGGTTACCAGAGTTGCAGGAGATGTGGAGAGAATCAGGGCATGCTG	61	100	64M;	A:2:0-61:100	aaatgatcaaatggtgtcactc	54.988	Temperature too low;	gtaacctcatccagttgcctaa	57.784
S14_27224897	T	1	5.23861e-17	2	5	T	1	TCA	3	0	TAGGCAACTGGATGAGGTTACCAGAGTTGCAGGAGATGTGGAGAGAATCAGGGCATGCTG	60	100	T	1	TCA	3	0	TAGGCAACTGGATGAGGTTACCAGAGTTGCAGGAGATGTGGAGAGAATCAGGGCATGCTG	60	100	64M;	T:3:0-60:100	aatgatcaaatggtgtcactca	55.982	Temperature too low;	ggtaacctcatccagttgccta	59.496
S14_27224898	T	2	5.23861e-17	2	5	T	1	TCAT	4	0	AGGCAACTGGATGAGGTTACCAGAGTTGCAGGAGATGTGGAGAGAATCAGGGCATGCTG	59	100	T	1	TCAT	4	0	AGGCAACTGGATGAGGTTACCAGAGTTGCAGGAGATGTGGAGAGAATCAGGGCATGCTG	59	100	64M; 28M4I32M;	T:4:0-59:100	atgatcaaatggtgtcactcat	55.768	Temperature too low;	tggtaacctcatccagttgcct	61.365
S14_27224928	A	2	5.23861e-17	2	2	A	1	TCATTAGGCAACTGGATGAGGTTACCAGAGTTGC	34	100	GGAGATGTGGAGAGAATCAGGGCATGCTG	29	100	A	1	TCATTAGGCAACTGGATGAGGTTACCAGAGTTGC	34	100	GGAGATGTGGAGAGAATCAGGGCATGCTG	29	100	64M; 28M4I32M;	A:34:100-29:100	tggatgaggttaccagagttgc	60.027		ccctgattctctccacatctcc	59.632
S14_27224946	C	2	5.23861e-17	2	2	C	1	TCATTAGGCAACTGGATGAGGTTACCAGAGTTGCAGGAGATGTGGAGAGAAT	52	100	AGGGCATGCTG	11	100	C	1	TCATTAGGCAACTGGATGAGGTTACCAGAGTTGCAGGAGATGTGGAGAGAAT	52	100	AGGGCATGCTG	11	100	64M; 28M4I32M;	C:52:100-11:100	ttgcaggagatgtggagagaat	59.158		cccaagtttggcagcatgccct	66.202	Temperature too high; Hairpin stability too high;
S14_27241744	A	3	3.56713e-21	2	0	A	2	CTGCATGCTCGTGAAATGGCCGAGTCTTTTCTGAAATTATCCAA	44	100	CCAAAGCTGAAAAAGAAAG	19	100	G	1	CTGCATGCTCGTGAAATGGCTGAGTCTTTTCTGAAACTATCCAA	44	100	CCAAAGCTGACAAAGAAAG	19	100	64M; 64M; 64M;	A:44:95-19:95 A:44:100-19:100 G:44:100-19:100	agtcttttctgaaactatccaa	53.021	Temperature too low;	ttcctttctttgtcagctttgg	57.346
S14_27255039	A	3	4.2444e-18	2	5	A	2	CAGACCTTAGTGG	13	100	GATAAAGCTCCAGGCCCAGATGGTTTTTTCTTGGCTTTTTGGCGGTGCAG	50	90	G	1	CAGACCTTAGTGG	13	100	GATAAAGCTCCAGGCCCAGATGGTTTTTTCTTGGCTTTTTGGCAGTGCAG	50	90	64M; 64M; 64M;	A:13:100-50:90 G:13:100-50:90 A:13:100-50:90	aaggcctctcagaccttagtgg	61.156		catttgggccaggagctttatc	59.637
S14_27258913	A	2	3.65459e-19	2	0	A	1	CAGCTGTCACACCATGGGGGATTACAG	27	100	TGCACCGTTGCCACCGCTAATGCTGTCATCAGGGAC	36	100	G	1	CAGCTGTCACACCATGGGGGATTACAG	27	100	TGCACCGTTGCCACCGCTAATGCTGTCATCAGGGAC	36	100	64M; 64M;	A:27:100-36:100 G:27:100-36:100	gtcacaccatgggggattacag	60.684		cattagcggtggcaacggtgca	66.394	Temperature too high; Hairpin stability too high;
S14_27263681	T	2	1.45087e-22	1	0	T	1	GAGACTCTGCTTGAGTGGAGCGGCTCTTTCATTGGAAGGAAGCAGAAAAAAG	52	100	ATGGGGAGCAG	11	100	C	1	GAGACTCTGCTTGAGTGGAGCGGCTCTTTCATTGGAAGGAAGCAGAAAAAAG	52	100	ATGGGGAGCAG	11	100	64M; 64M;	T:52:100-11:100 C:52:100-11:100	attggaaggaagcagaaaaaag	55.425	Temperature too low; Contains too-long poly nucleotide tract;	gcacaaaggggctgctccccat	67.689	Temperature too high; Hairpin stability too high;
S14_27312339	A	3	5.76146e-20	1	0	A	1	CTGCGTTTGAACTGATTATGCCACA	25	100	CACCTCATATACCCATTTGAACTGTGCTG	29	100	G	2	CTGCGTTTGAACTGATTATGCCACA	25	100	CACCTCATATACCCATTTGAACTGTGCTG	29	100	55M; 55M; 55M;	G:25:100-29:100 G:25:100-29:100 A:25:100-29:100	cgtttgaactgattatgccaca	57.582		gttcaaatgggtatatgaggtg	54.595	Temperature too low;
S14_27336481	A	3	2.17529e-19	1	0	A	2	CAGCAACTTAG	11	100	GAAAGCCTTCACAGAGAAGTACCCTGACTTAGAAATACACTCATCAACCTAT	52	100	T	1	CAGCAACTTAG	11	100	GAAAGCCTTCACAGAGAAGTACCCTGACTTAGAAATACACTCATCAACCTAT	52	100	64M; 64M; 64M;	A:11:100-52:100 A:11:100-52:100 T:11:100-52:100	gcacctgaatgcagcaacttag	60.415		gtacttctctgtgaaggctttc	56.739	Temperature too low; Hairpin stability too high;
S14_27340207	A	3	1.11478e-16	1	2	A	2	CAGCCTAAAAA	11	100	GCTACTATGCAAAGAGCACTATTGCCAAACTGTGTCAATTTAATATCCAAGG	52	100	A	2	CAGCCTAAAAA	11	100	GCTACTATGCAAAGAGCACTATTGCCAAACTGTGTCAATTTAATATCCAAGG	52	100	64M; 64M; 6M1D58M;	A:11:100-52:100 A:11:100-52:100	tctttatatggcagcctaaaaa	53.479	Temperature too low;	atagtgctctttgcatagtagc	56.051	Temperature too low; Hairpin stability too high;
S14_27340221	G	3	1.11478e-16	1	2	G	2	CAGCCTAAAAAAGCTACTATGCAAA	25	100	AGCACTATTGCCAAACTGTGTCAATTTAATATCCAAGG	38	100	G	2	CAGCCTAAAAAAGCTACTATGCAAA	25	100	AGCACTATTGCCAAACTGTGTCAATTTAATATCCAAGG	38	100	64M; 64M; 6M1D58M;	G:25:100-38:95 G:25:100-38:100	cctaaaaaagctactatgcaaa	52.759	Temperature too low; Contains too-long poly nucleotide tract;	gaaacagtttggcaatagtgct	57.757	Hairpin stability too high;
S14_27340259	G	6	1.11478e-16	1	2	G	5	CAGCCTAAAAAAGCTACTATGCAAAGAGCACTATTGCCAAACTGTGTCAATTTAATATCCAAG	63	100	CTACAAGGCAACAAAATGATGTGCAAGTTTGGTCAGAGCTGACCCAATACAAAATGCAG	59	95	G	5	CAGCCTAAAAAAGCTACTATGCAAAGAGCACTATTGCCAAACTGTGTCAATTTAATATCCAAG	63	100	CTACAAGGCAACAAAATGATGTGCAAGTTTGGTCAGAGCTGACCCAATACAAAATGCAG	59	95	64M; 64M; 6M1D58M; 64M; 64M; 64M;	G:63:95-0:0 G:63:100-0:0 G:4:0-59:95 G:4:0-59:95 G:4:0-59:90	ctgtttcaatttaatatccaag	49.281	Temperature too low;	acatcattttgttgctttgtag	53.862	Temperature too low;
S14_27340263	C	3	1.18387e-21	1	5	C	2	CAAGGCTA	8	0	AAGGCAACAAAATGATGTGCAAGTTTGGTCAGAGCTGACCCAATACAAAATGCAG	55	95	A	1	CAAGGCTA	8	0	AAGGCAACAAAATGATGTGCAAGTTTGGTCAGAGCCGACCCAATACAAAATGCAG	55	95	64M; 64M; 64M;	C:8:0-55:95 C:8:0-55:95 A:8:0-55:95	ttcaatttaatatccaaggcta	50.889	Temperature too low;	ttgcacatcattttgttgcttt	56.507	Temperature too low;
S14_27369154	G	3	1.14383e-24	1	0	G	1	CTGCACTAGCAAGGCATGATGCACAAC	27	100	ATCACGGTCCAAAGTCTTCCAACAACTAGCCATACC	36	100	T	2	CTGCACTAGCAAGGCATGATGCACAAC	27	100	ATCATAGTCCAAAGTCTTCCAACAACTAGCCATACC	36	100	64M; 64M; 64M;	G:27:100-36:100 T:27:100-36:90 T:27:100-36:100	ctagcaaggcatgatgcacaac	60.479	Hairpin stability too high;	ttggaagactttggaccgtgat	59.894
S14_27405330	C	4	3.78965e-18	2	0	C	1	CTGCGATTTTC	11	100	CATCTTCTTCTTCTCTAGCCCTCAAAAACCCTAATCTTTCAATCTCTTCCGA	52	100	T	3	CTGCGATTTTC	11	100	CATCTTCTTCTTCTCTAGCCCTCAAAAACCCTAATCTTTCAATCTCTTCCAA	52	100	64M; 64M; 64M; 64M;	C:11:100-52:100 T:11:100-52:100 T:11:100-52:100 T:11:91-52:100	tatgtctggcgctgcgattttc	61.877		agggctagagaagaagaagatg	56.706	Temperature too low;
S14_27405381	G	4	3.78965e-18	2	5	G	1	CTGCGATTTTCCCATCTTCTTCTTCTCTAGCCCTCAAAAACCCTAATCTTTCAATCTCTTCC	62	100	A	1	0	A	3	CTGCGATTTTCTCATCTTCTTCTTCTCTAGCCCTCAAAAACCCTAATCTTTCAATCTCTTCC	62	100	A	1	0	64M; 64M; 64M; 64M;	G:62:100-1:0 A:62:100-1:0 A:62:100-1:0 A:62:100-1:0	ccctaatctttcaatctcttcc	53.969	Temperature too low;	attccattgaagaacctctgat	55.12	Temperature too low;
S14_27436241	G	7	1.42979e-23	2	0	G	5	CAGCCAGGGAAATGAAGGC	19	100	GTTTTCTTGGTCCTCGCCCAGGAAAGAGGAGGCAG	35	100	A	2	CAGCCAGGGTAATGAAGGC	19	100	GTTTTCTTGGTCCTCGCCCAGGAAAGAGGAGGCAG	35	100	55M; 55M; 55M; 55M; 55M; 55M; 55M;	G:19:95-35:100 G:19:95-35:100 G:19:95-35:100 A:19:100-35:100 G:19:100-35:100 G:19:100-35:100 A:19:100-35:100	ttgcagccagggtaatgaaggc	63.438	Temperature too high;	cctgggcgaggaccaagaaaac	63.651	Temperature too high;
S14_27436293	G	19	1.14383e-24	2	0	G	13	CAGCGCTCAGGCGAAGCAA	19	100	CAATGAGGGTGAGATCCCCACATCCACCCCAGTCATGGCTAGGCCAGCAG	50	100	T	6	CAGCGCTCAGGTGAAGCAA	19	100	CAATGAGGGTGAGATCCCCACATCCCCCACAGTCATGGCTAGGCCAGCAG	50	100	64M; 64M; 64M; 64M; 64M; 64M; 64M; 64M; 64M; 64M; 64M; 64M; 64M; 64M; 64M; 64M; 64M; 64M; 64M;	G:19:95-44:100 G:19:100-44:95 G:19:100-44:95 G:19:100-44:95 G:19:100-44:100 G:19:100-44:100 G:19:100-44:100 T:19:100-44:95 T:19:100-44:100 T:19:100-44:100 T:19:100-44:100 G:13:100-50:100 G:13:100-50:100 G:13:100-50:100 T:13:100-50:100 G:13:100-50:100 T:13:100-50:100 G:13:100-50:100 G:13:100-50:100	aggcagcgctcaggtgaagcaa	67.234	Temperature too high; Hairpin stability too high;	tgtggggatctcaccctcattg	61.757	Hairpin stability too high;
S14_27444275	T	4	1.14383e-24	1	0	T	2	CTGCTCTTCGGACCATTGCAACTCCGAGCCGACAAATGCCT	41	100	CTTTTGGTAGCATTCCAATGGTTCTTGATGGTATTCTCAGTTCTTCCCGGCAG	53	100	C	2	CTGCTCTTCGGACCATTGCAACTCCGAGCCGACAAATGCCT	41	100	CTTTTGGTAGCATTCCAATGGTTCTTGATGGTATTCTCAGTTCTTCCCGGCAG	53	100	64M; 64M; 64M; 64M;	C:41:100-22:100 T:41:100-22:100 T:10:100-53:100 C:10:100-53:100	aactccgagccgacaaatgcct	64.785	Temperature too high;	accattggaatgctaccaaaag	57.193	Hairpin stability too high;
S14_27453239	G	3	1.14383e-24	1	0	G	2	CTGCAACATC	10	100	GTGGCCACAAGTACCGGGGACCTCCCAGTGCGGAACTGATTCAATACATAATC	53	100	A	1	CTGCAACATC	10	100	GTGGCCACAAGTACCGGGGACCTCCCAGTGCGGAACTGATTCAATACATAATC	53	100	64M; 64M; 64M;	A:10:100-53:100 G:10:100-53:100 G:10:100-53:95	caagtcctcgagctgcaacatc	61.811		ggtccccggtacttgtggccac	67.301	Temperature too high;
S14_27453254	C	3	1.42979e-23	2	0	C	2	CTGCAACATCAGTGGCCACAAGTAC	25	100	GGGGACCTCCCAGTGCGGAACTGATTCAATACATAATC	38	100	T	1	CTGCAACATCGGTGGCCACAAGTAC	25	100	GGGGACCTCCCAGTGCGGAACTGATTCAATACATAATC	38	100	64M; 64M; 64M;	C:25:95-38:100 C:25:100-38:100 T:25:100-38:100	caacatcggtggccacaagtac	62.012		agttccgcactgggaggtcccc	68.225	Temperature too high; Hairpin stability too high;
S14_27456804	G	5	5.15426e-23	2	0	G	3	CAGCAGGAAATTGCAAGATATAAGGTGAGATGA	33	100	AGAAATAAAAAGGTAAAAAACTGGACCAATTTGATTTGTAAAACAAGGACACATGCAG	58	100	C	2	CAGCAGGAAATTGCAAGATATGAGGTGAGATGA	33	95	AGAAATAAAAAGGTAAAAAACTGGACCAATTTGATTTGTAAAACAAGGACACATGCAG	58	100	64M; 64M; 64M; 64M; 64M;	G:33:100-30:100 C:33:95-30:100 G:33:95-30:100 G:5:0-58:100 C:5:0-58:100	tgcaagatataaggtgagatga	54.419	Temperature too low;	agttttttacctttttatttct	48.068	GC content too low; Temperature too low; Contains too-long poly nucleotide tract;
S14_27478524	A	7	1.00844e-22	1	2	A	6	TTTTATTGCATTGGCAATACAAGCTCAGTACTTATTGAGGAAGGAAGAAGGG	52	100	TAATATGGTCCACAGGAAGATGGGATGCCAGCTTGTACAAACCTCATCCAGCAG	54	100	A	6	TTTTATTGCATTGGCAATACAAGCTCAGTACTTATTGAGGAAGGAAGAAGGG	52	100	TAATATGGTCCACAGGAAGATGGGATGCCAGCTTGTACAAACCTCATCCAGCAG	54	100	53M11S; 64M; 64M; 23M14D41M; 64M; 64M; 64M;	A:52:50-0:0 A:52:100-11:100 A:52:100-11:91 A:9:0-54:95 A:9:0-54:100 A:9:0-54:100	caagctcagtacttattgagga	55.296	Temperature too low;	catcttcctgtggaccatatta	55.035	Temperature too low;
S14_27478525	T	6	8.58368e-21	1	2	T	5	CTGCAGAGAACTTTTATTGCATTGGCAATACAAGCTCAGTACTTATTGAGGAA	53	100	AATATGGTCCACAGGAAGATGGGATGCCAGCTTGTACAAACCTCATCCAGCAG	53	100	T	5	CTGCAGAGAACTTTTATTGCATTGGCAATACAAGCTCAGTACTTATTGAGGAA	53	100	AATATGGTCCACAGGAAGATGGGATGCCAGCTTGTACAAACCTCATCCAGCAG	53	100	64M; 64M; 23M14D41M; 64M; 64M; 64M;	T:53:100-10:100 T:53:100-10:90 T:10:100-53:95 T:10:100-53:100 T:10:100-53:95	aagctcagtacttattgaggaa	54.557	Temperature too low;	ccatcttcctgtggaccatatt	57.556
S14_27478527	A	6	1.00844e-22	1	2	A	5	CTGCAGAGAACTTTTATTGCATTGGCAATACAAGCTCAGTACTTATTGAGGAATA	55	100	TATGGTCCACAGGAAGATGGGATGCCAGCTTGTACAAACCTCATCCAGCAG	51	100	A	5	CTGCAGAGAACTTTTATTGCATTGGCAATACAAGCTCAGTACTTATTGAGGAATA	55	100	TATGGTCCACAGGAAGATGGGATGCCAGCTTGTACAAACCTCATCCAGCAG	51	100	64M; 64M; 23M14D41M; 64M; 64M; 64M;	A:55:100-8:0 A:55:95-8:0 A:12:92-51:100 A:12:100-51:100 A:12:100-51:95	gctcagtacttattgaggaata	52.835	Temperature too low;	tcccatcttcctgtggaccata	60.294
S14_27478530	T	6	1.00844e-22	1	2	T	5	CTGCAGAGAACTTTTATTGCATTGGCAATACAAGCTCAGTACTTATTGAGGAATAATA	58	100	GGTCCACAGGAAGATGGGATGCCAGCTTGTACAAACCTCATCCAGCAG	48	100	T	5	CTGCAGAGAACTTTTATTGCATTGGCAATACAAGCTCAGTACTTATTGAGGAATAATA	58	100	GGTCCACAGGAAGATGGGATGCCAGCTTGTACAAACCTCATCCAGCAG	48	100	64M; 64M; 23M14D41M; 64M; 64M; 64M;	T:58:100-5:0 T:58:95-5:0 T:15:93-48:100 T:15:100-48:100 T:15:100-48:95	cagtacttattgaggaataata	48.262	Temperature too low;	gcatcccatcttcctgtggacc	62.975
S14_27478532	G	6	1.00844e-22	1	2	G	5	CTGCAGAGAACTTTTATTGCATTGGCAATACAAGCTCAGTACTTATTGAGGAATAATATG	60	100	TCCACAGGAAGATGGGATGCCAGCTTGTACAAACCTCATCCAGCAG	46	100	G	5	CTGCAGAGAACTTTTATTGCATTGGCAATACAAGCTCAGTACTTATTGAGGAATAATATG	60	100	TCCACAGGAAGATGGGATGCCAGCTTGTACAAACCTCATCCAGCAG	46	100	64M; 64M; 23M14D41M; 64M; 64M; 64M;	G:60:100-3:0 G:60:95-3:0 G:17:94-46:100 G:17:100-46:100 G:17:100-46:95	gtacttattgaggaataatatg	47.425	Temperature too low;	tggcatcccatcttcctgtgga	63.454	Temperature too high;
S14_27478533	T	6	1.00844e-22	1	2	T	5	CTGCAGAGAACTTTTATTGCATTGGCAATACAAGCTCAGTACTTATTGAGGAATAATATGG	61	100	CCACAGGAAGATGGGATGCCAGCTTGTACAAACCTCATCCAGCAG	45	100	T	5	CTGCAGAGAACTTTTATTGCATTGGCAATACAAGCTCAGTACTTATTGAGGAATAATATGG	61	100	CCACAGGAAGATGGGATGCCAGCTTGTACAAACCTCATCCAGCAG	45	100	64M; 64M; 23M14D41M; 64M; 64M; 64M;	T:61:100-2:0 T:61:95-2:0 T:18:94-45:100 T:18:100-45:100 T:18:100-45:95	tacttattgaggaataatatgg	48.255	Temperature too low;	ctggcatcccatcttcctgtgg	62.98
S14_27478536	A	4	1.00844e-22	1	2	A	3	TATTGAGGAATGATATGGTCC	21	100	CAGGAAGATGGGATGCCAGCTTGTACAAACCTCATCCAGCAG	42	100	A	3	TATTGAGGAATGATATGGTCC	21	100	CAGGAAGATGGGATGCCAGCTTGTACAAACCTCATCCAGCAG	42	100	23M14D41M; 64M; 64M; 64M;	A:21:95-42:100 A:21:100-42:100 A:21:100-42:95	ttattgaggaataatatggtcc	50.792	Temperature too low;	aagctggcatcccatcttcctg	62.673
S14_27478537	C	4	1.00844e-22	1	2	C	3	TATTGAGGAATGATATGGTCCA	22	100	AGGAAGATGGGATGCCAGCTTGTACAAACCTCATCCAGCAG	41	100	C	3	TATTGAGGAATGATATGGTCCA	22	100	AGGAAGATGGGATGCCAGCTTGTACAAACCTCATCCAGCAG	41	100	23M14D41M; 64M; 64M; 64M;	C:22:95-41:100 C:22:100-41:100 C:22:100-41:95	tattgaggaataatatggtcca	51.754	Temperature too low;	caagctggcatcccatcttcct	62.673
S14_27555698	C	4	7.10034e-20	1	2	C	3	CTGCTTGACTGTTCAACCATTTGTCATTCTTTACTGATCAAGAAAAAGAGGTGACACTTG	60	100	TGACCTTATTGCTG	14	93	C	3	CTGCTTGACTGTTCAACCATTTGTCATTCTTTACTGATCAAGAAAAAGAGGTGACACTTG	60	100	TGACCTTATTGCTG	14	93	64M; 64M; 64M; 14M4I46M;	C:60:100-3:0 C:60:100-3:0 C:49:100-14:93	caagaaaaagaggtgacacttg	55.779	Temperature too low;	tacacttgctgcaataaggtca	57.985
S14_27555699	T	4	7.10034e-20	1	2	T	3	CTGCTTGACTGTTCAACCATTTGTCATTCTTTACTGATCAAGAAAAAGAGGTGACACTTGC	61	100	GACCTTATTGCTG	13	92	T	3	CTGCTTGACTGTTCAACCATTTGTCATTCTTTACTGATCAAGAAAAAGAGGTGACACTTGC	61	100	GACCTTATTGCTG	13	92	64M; 64M; 64M; 14M4I46M;	T:61:100-2:0 T:61:100-2:0 T:50:100-13:92	aagaaaaagaggtgacacttgc	57.361		atacacttgctgcaataaggtc	56.765	Temperature too low;
S14_27555700	G	4	7.10034e-20	1	2	G	3	CTGCTTGACTGTTCAACCATTTGTCATTCTTTACTGATCAAGAAAAAGAGGTGACACTTGCT	62	100	ACCTTATTGCTG	12	92	G	3	CTGCTTGACTGTTCAACCATTTGTCATTCTTTACTGATCAAGAAAAAGAGGTGACACTTGCT	62	100	ACCTTATTGCTG	12	92	64M; 64M; 64M; 14M4I46M;	G:62:100-1:0 G:62:100-1:0 G:51:100-12:92	agaaaaagaggtgacacttgct	58.109		tatacacttgctgcaataaggt	55.519	Temperature too low;
S14_27555701	A	4	7.10034e-20	1	2	A	3	CTGCTTGACTGTTCAACCATTTGTCATTCTTTACTGATCAAGAAAAAGAGGTGACACTTGCTG	63	100	CCTTATTGCTG	11	91	A	3	CTGCTTGACTGTTCAACCATTTGTCATTCTTTACTGATCAAGAAAAAGAGGTGACACTTGCTG	63	100	CCTTATTGCTG	11	91	64M; 64M; 64M; 14M4I46M;	A:63:100-0:0 A:63:100-0:0 A:52:100-11:91	gaaaaagaggtgacacttgctg	58.043		ttatacacttgctgcaataagg	54.534	Temperature too low;
S14_27560094	T	2	2.13697e-18	1	0	T	1	CTGCACATGTTGCTGAT	17	100	CTTATTCTCCACCATCCTACCCTGCCAATCTCGAGGCTTTTCCGGG	46	100	C	1	CTGCACATGTTGCTGAT	17	100	CTTATTCTCCACCATCCTACCCTGCCAATCTCGAGGCTTTTCCGGG	46	100	64M; 64M;	C:17:100-46:100 T:17:100-46:100	gggtgctgcacatgttgctgat	64.236	Temperature too high; Hairpin stability too high;	gggtaggatggtggagaataag	57.374
S14_27565587	T	14	1.14383e-24	1	0	T	3	CAGCCACAATCACCCCTGCTGTTGCATGCCAAGCATACATTGGTTTTTGAAGA	53	100	TGAGGCCAGAGCTG	14	100	A	11	CAGCCACAATCACCCCTGCTGTCGCATGCCAAGCATACATTGGTTTTTGAAGA	53	100	TGAGGCCAGAGCTG	14	100	64M; 64M; 64M; 64M; 64M; 64M; 64M; 64M; 64M; 64M; 64M; 64M; 64M; 64M;	A:53:100-10:100 A:53:100-10:90 A:53:100-10:100 T:53:100-10:100 T:49:100-14:100 T:49:100-14:100 A:49:100-14:100 A:49:100-14:100 A:49:100-14:100 A:49:100-14:100 A:49:100-14:100 A:49:100-14:93 A:49:100-14:93 A:49:100-14:93	agcatacattggtttttgaaga	54.532	Temperature too low;	gaggtgagcagctctggcctca	66.24	Temperature too high; Hairpin stability too high;
S14_27565588	T	14	1.14383e-24	2	0	T	10	CAGCCACAATCACCCCTGCTGTCGCATGCCAAGCATACATTGGTTTTTGAAGAA	54	100	GAGGCCAGAGCTG	13	100	C	4	CAGCCACAATCACCCCTGCTGTTGCATGCCAAGCATACATTGGTTTTTGAAGAA	54	95	GAGGCCAGAGCTG	13	100	64M; 64M; 64M; 64M; 64M; 64M; 64M; 64M; 64M; 64M; 64M; 64M; 64M; 64M;	T:54:95-9:0 C:54:95-9:0 T:54:95-9:0 T:54:100-9:0 T:50:100-13:100 T:50:100-13:100 T:50:95-13:100 T:50:95-13:100 T:50:95-13:100 T:50:95-13:100 T:50:95-13:100 C:50:95-13:100 C:50:95-13:100 C:50:95-13:100	gcatacattggtttttgaagat	53.621	Temperature too low;	tgaggtgagcagctctggcctc	66.24	Temperature too high; Hairpin stability too high;
S14_27676909	G	3	4.89255e-16	1	0	G	2	CTGCAAGGGAGCTTGGTTTTGAGTTTTTTTCAAGGAAACAAAC	43	100	TGCATCTCATTGCATGAGTT	20	100	A	1	CTGCAAGGGAGCTTGGTTTTGAGTTTTTTTCAAGGAAACAAAC	43	100	TGCATCTCATTGCATGAGTT	20	100	64M; 64M; 64M;	A:43:100-20:100 G:43:100-20:100 G:43:95-20:95	agtttttttcaaggaaacaaac	52.476	Temperature too low; Contains too-long poly nucleotide tract;	ctaactcatgcaatgagatgca	56.844	Temperature too low; Hairpin stability too high;
S14_27742677	G	5	3.20418e-24	1	5	G	3	CTGCCATTGCCATGCCTGCTAAAACATAATGCTCAAGA	38	100	CGGCTTCATAATCTCCTTTTGAGTCGCAGATAAGCGCCATTAGTCTCCTGTCTGCTG	57	95	T	2	TCAAGA	6	0	TAGCTTCATAATCTCCTTTTGAGTCGCAGATAAGCGCCATTAGTCTCATGTCTGCTG	57	95	64M; 42M; 64M; 64M; 64M;	G:38:100-25:95 G:38:100-3:0 G:6:0-57:95 T:6:0-57:95 T:6:0-57:95	tgctaaaacataatgctcaaga	54.095	Temperature too low;	tcaaaaggagattatgaagctg	54.178	Temperature too low;
S14_27742679	A	7	6.2084e-29	1	0	A	5	CTGCCATTGCCATGCCTGCTAAAACATAATGCTCAAGAGC	40	100	GCTTCATAATCTCCTTTTGAGTCGCAGATAAGCGCCATTAGTCTCATGTCTGCTG	55	100	G	2	CTGCCATTGCCATGCCTGCTAAAACATAATGCTCAAGAGC	40	100	GCTTCATAATCTCCTTTTGAGTCGCAGATAAGCGCCATTAGTCTCCTGTCTGCTG	55	100	64M; 42M; 64M; 64M; 64M; 57M; 57M;	G:40:100-23:100 A:40:100-1:0 G:8:0-55:100 A:8:0-55:100 A:8:0-55:100 A:1:0-55:100 A:1:0-55:100	ctaaaacataatgctcaagagc	53.594	Temperature too low; Hairpin stability too high;	actcaaaaggagattatgaagc	54.174	Temperature too low; Hairpin stability too high;
S14_27754250	T	2	7.00307e-26	1	5	T	1	CTGCT	5	0	TCTCGCATGGCTAACCTAGGTATTCAGGATGACCTGAATAGCAGAACAAGAGGCTCAA	58	100	C	1	CTGCT	5	0	TCTCGCATGGCTAACCTAGGTATTCAGGATGACCTGAATAGCAGAACAAGAGGCTCAA	58	100	64M; 64M;	C:5:0-58:100 T:5:0-58:100	ttcttttccagggagcgctgct	64.753	Temperature too high;	tacctaggttagccatgcgaga	60.424
S14_27779977	C	4	7.00307e-26	1	0	C	2	CTGCAACTGAAAGTGGGGAATGACAGGACCACCACTCATGTAACATTGGTCACAAA	56	100	CATGACCTTCTGTATCCAAAAAGAATAAAGATAAAAGGGAAACAGCTG	48	100	G	2	CTGCAACTGAAAGTGGGGAATGACAGGACCACCACTCATGTAACATTGGTCACAAA	56	100	CATGACCTTCTGTATCCAAATAGAATAAAGATAAAAGGGAAACAGCTG	48	100	64M; 64M; 64M; 64M;	C:56:100-7:0 G:56:100-7:0 G:15:100-48:100 C:15:100-48:100	ctcatgtaacattggtcacaaa	54.939	Temperature too low;	tttttggatacagaaggtcatg	54.361	Temperature too low; Hairpin stability too high;
S14_27779998	A	4	1.35322e-16	1	0	A	3	AACATTGGTCACAAACCATGACCTTCTGTATCCAAA	36	100	AGAATAAAGATAAAAGGGAAACAGCTG	27	100	T	1	AACATTGGTCACAAAGCATGACCTTCTGTATCCAAA	36	100	AGAATAAAGATAAAAGGGAAACAGCTG	27	95	64M; 64M; 33S31M; 20S44M;	T:36:100-27:95 A:36:100-27:95 A:16:100-14:100 A:16:100-27:95	accatgaccttctgtatccaaa	57.073		gttttccttttatctttattct	48.12	Temperature too low;
S14_27816191	G	4	3.28853e-24	2	5	G	2	CTGCAGAAATATTTCTAACCCCAAAATTGAGTGCAAAATTGCAAACTGGCAATTT	55	100	GGCAAGCTG	9	0	A	2	CTGCAGAAATATTTCTAACCCCAAAATTGAGTGCAAAATTGCAAACTGGCAATTT	55	100	GGCAAGCTG	9	0	64M; 64M; 64M; 64M;	A:55:100-8:0 G:55:100-8:0 G:54:100-9:0 A:54:100-9:0	caaaattgcaaactggcaattt	55.758	Temperature too low; Hairpin stability too high;	atgacttggtttgcagcttgcc	62.491
S14_27830690	C	4	1.14383e-24	2	0	C	2	CTGCGTTTATAGC	13	100	TTATTGACCACATCGGCGGTCACTGCAAATTCAATCCAATCCCATGTGTG	50	100	T	1	CTGCGTTTATAGC	13	100	TTATTGACCACATCGGCGGTCACTGCAAATTCAATCCAATCCCATGTGTG	50	100	64M; 64M; 40M1D14M4D10M; 64M;	C:13:100-50:100 C:13:100-50:100 T:13:100-50:100	gtgggtgtgctgcgtttatagc	62.379		tgaccgccgatgtggtcaataa	62.309	Hairpin stability too high;
S14_27830772	C	3	7.00307e-26	1	2	C	1	CTGCGTTTATACC	13	92	TTATTGACCAAATCGGCGCCAATGCAAATCCAGTTCAATACCACGTGTGA	50	100	C	1	CTGCGTTTATACC	13	92	TTATTGACCAAATCGGCGCCAATGCAAATCCAGTTCAATACCACGTGTGA	50	100	64M; 49M1I14M; 12M1D52M;	C:13:92-50:100	ctgggtgtgctgcgtttatatc	59.712		ttggcgccgatttggtcaataa	61.459
S14_27830777	T	3	6.9482e-19	1	2	T	1	CTGCGTTTATACCCTTAT	18	94	GACCAAATCGGCGCCAATGCAAATCCAGTTCAATACCACGTGTGA	45	100	T	1	CTGCGTTTATACCCTTAT	18	94	GACCAAATCGGCGCCAATGCAAATCCAGTTCAATACCACGTGTGA	45	100	64M; 49M1I14M; 12M1D52M;	T:18:94-45:100	tgtgctgcgtttatatccttat	55.685	Temperature too low;	ttgcattggcgccgatttggtc	65.064	Temperature too high;
S14_27830811	-	7	7.00307e-26	1	3																	64M; 49M1I14M; 12M1D52M; 64M; 28M1I35M; 47M1I16M; 47M17S;	T:52:95-11:100 T:32:95-31:95 A:31:90-15:0	cgccaatgcaaatccagttgaa	60.61		gactcctgaaatcacacgtggt	60.548
S14_27830824	-	4	7.00307e-26	1	3																	64M; 28M1I35M; 47M1I16M; 47M17S;	T:45:95-18:94 C:44:30-2:0	ccagttgaataccacgtgtgat	58.665		gcagcagcacaccgactcctga	67.206	Temperature too high;
S14_27830831	G	3	6.9482e-19	1	2	G	1	ACCAAATCGGCGCCAATGCAAATCCAGTTCAATACCACGTGTGATTTGAGGA	52	95	TCGGTGTGCTG	11	100	G	1	ACCAAATCGGCGCCAATGCAAATCCAGTTCAATACCACGTGTGATTTGAGGA	52	95	TCGGTGTGCTG	11	100	64M; 28M1I35M; 47M1I16M;	G:52:95-11:100	aataccacgtgtgatttcagga	57.72		tataaacgcagcagcacaccga	62.857
S14_27830833	C	3	6.9482e-19	1	5	C	1	ACCAAATCGGCGCCAATGCAAATCCAGTTCAATACCACGTGTGATTTGAGGAGT	54	95	GGTGTGCTG	9	0	C	1	ACCAAATCGGCGCCAATGCAAATCCAGTTCAATACCACGTGTGATTTGAGGAGT	54	95	GGTGTGCTG	9	0	64M; 28M1I35M; 47M1I16M;	C:54:95-9:0	taccacgtgtgatttcaggagt	59.369		gttataaacgcagcagcacacc	60.728
S14_27846258	C	19	7.00307e-26	2	2	C	8	CTGCGAGGAACACCTTTGCAGAGACACTGAGCCTGAGAGCCTGAG	45	100	GCGCCCCGACCGACGCTG	18	100	C	8	CTGCGAGGAACACCTTTGCAGAGACACTGAGCCTGAGAGCCTGAG	45	100	GCGCCCCGACCGACGCTG	18	100	64M; 29M1D34M; 29M1D34M; 64M; 29M1D34M; 29M1D34M; 64M; 29M1D34M; 64M; 29M1D34M; 29M1D34M; 64M; 64M; 64M; 64M; 29M1D34M; 29M1D34M; 29M1D34M; 29M1D34M;	C:45:100-18:100 C:45:100-18:100 C:45:100-18:100 C:45:100-18:100 C:45:100-18:100 C:45:100-18:100 C:45:100-18:100 C:45:100-18:100	acactgagcctgagagcctgag	63.696	Temperature too high;	gcggcagcgtcggtcggggcgc	77.128	GC content too high; Temperature too high; Hairpin stability too high;
S14_27851996	T	3	2.73148e-16	1	2	T	3	CAGCTCTCCAGTGGACTGTGGATCGAGATTATT	33	100	ACTTCTATTTAGGAGGAAAAAAGAAAAAAGGCAAAAGACAAAAGAACTGCTGTTCGAGGCAG	62	100	T	3	CAGCTCTCCAGTGGACTGTGGATCGAGATTATT	33	100	ACTTCTATTTAGGAGGAAAAAAGAAAAAAGGCAAAAGACAAAAGAACTGCTGTTCGAGGCAG	62	100	64M; 64M; 64M;	T:33:95-30:100 T:33:100-30:100 T:1:0-62:100	tggactgtggatggagattatt	56.589	Temperature too low;	ttttttcctcctaaatagaagt	50.67	Temperature too low; Contains too-long poly nucleotide tract;
S14_27851997	A	3	2.73148e-16	1	2	A	3	CAGCTCTCCAGTGGACTGTGGATCGAGATTATTT	34	100	CTTCTATTTAGGAGGAAAAAAGAAAAAAGGCAAAAGACAAAAGAACTGCTGTTCGAGGCAG	61	100	A	3	CAGCTCTCCAGTGGACTGTGGATCGAGATTATTT	34	100	CTTCTATTTAGGAGGAAAAAAGAAAAAAGGCAAAAGACAAAAGAACTGCTGTTCGAGGCAG	61	100	64M; 64M; 64M;	A:34:95-29:100 A:34:100-29:100 A:2:0-61:100	ggactgtggatggagattattt	55.571	Temperature too low;	cttttttcctcctaaatagaag	50.246	Temperature too low; Contains too-long poly nucleotide tract;
S14_27851998	C	3	2.73148e-16	1	2	C	3	CAGCTCTCCAGTGGACTGTGGATCGAGATTATTTA	35	100	TTCTATTTAGGAGGAAAAAAGAAAAAAGGCAAAAGACAAAAGAACTGCTGTTCGAGGCAG	60	100	C	3	CAGCTCTCCAGTGGACTGTGGATCGAGATTATTTA	35	100	TTCTATTTAGGAGGAAAAAAGAAAAAAGGCAAAAGACAAAAGAACTGCTGTTCGAGGCAG	60	100	64M; 64M; 64M;	C:35:95-28:100 C:35:100-28:100 C:3:0-60:100	gactgtggatggagattattta	53.064	Temperature too low;	tcttttttcctcctaaatagaa	50.397	Temperature too low; Contains too-long poly nucleotide tract;
S14_27851999	T	3	2.73148e-16	1	2	T	3	CAGCTCTCCAGTGGACTGTGGATCGAGATTATTTAC	36	100	TCTATTTAGGAGGAAAAAAGAAAAAAGGCAAAAGACAAAAGAACTGCTGTTCGAGGCAG	59	100	T	3	CAGCTCTCCAGTGGACTGTGGATCGAGATTATTTAC	36	100	TCTATTTAGGAGGAAAAAAGAAAAAAGGCAAAAGACAAAAGAACTGCTGTTCGAGGCAG	59	100	64M; 64M; 64M;	T:36:95-27:100 T:36:100-27:100 T:4:0-59:100	actgtggatggagattatttac	53.332	Temperature too low;	ttcttttttcctcctaaataga	50.397	Temperature too low; Contains too-long poly nucleotide tract;
S14_27852000	T	3	2.73148e-16	1	2	T	3	CAGCTCTCCAGTGGACTGTGGATCGAGATTATTTACT	37	100	CTATTTAGGAGGAAAAAAGAAAAAAGGCAAAAGACAAAAGAACTGCTGTTCGAGGCAG	58	100	T	3	CAGCTCTCCAGTGGACTGTGGATCGAGATTATTTACT	37	100	CTATTTAGGAGGAAAAAAGAAAAAAGGCAAAAGACAAAAGAACTGCTGTTCGAGGCAG	58	100	64M; 64M; 64M;	T:37:95-26:100 T:37:100-26:100 T:5:0-58:100	ctgtggatggagattatttact	53.047	Temperature too low;	tttcttttttcctcctaaatag	49.734	Temperature too low; Contains too-long poly nucleotide tract;
S14_27852001	C	3	2.73148e-16	1	2	C	3	CAGCTCTCCAGTGGACTGTGGATCGAGATTATTTACTT	38	100	TATTTAGGAGGAAAAAAGAAAAAAGGCAAAAGACAAAAGAACTGCTGTTCGAGGCAG	57	100	C	3	CAGCTCTCCAGTGGACTGTGGATCGAGATTATTTACTT	38	100	TATTTAGGAGGAAAAAAGAAAAAAGGCAAAAGACAAAAGAACTGCTGTTCGAGGCAG	57	100	64M; 64M; 64M;	C:38:95-25:100 C:38:100-25:100 C:6:0-57:100	tgtggatggagattatttactt	52.562	Temperature too low;	ttttcttttttcctcctaaata	49.211	Temperature too low; Contains too-long poly nucleotide tract;
S14_27852002	T	3	2.73148e-16	1	2	T	3	CAGCTCTCCAGTGGACTGTGGATCGAGATTATTTACTTC	39	100	ATTTAGGAGGAAAAAAGAAAAAAGGCAAAAGACAAAAGAACTGCTGTTCGAGGCAG	56	100	T	3	CAGCTCTCCAGTGGACTGTGGATCGAGATTATTTACTTC	39	100	ATTTAGGAGGAAAAAAGAAAAAAGGCAAAAGACAAAAGAACTGCTGTTCGAGGCAG	56	100	64M; 64M; 64M;	T:39:95-24:100 T:39:100-24:100 T:7:0-56:100	gtggatggagattatttacttc	52.106	Temperature too low;	tttttcttttttcctcctaaat	50.036	Temperature too low; Contains too-long poly nucleotide tract;
S14_27852003	A	3	2.73148e-16	1	2	A	3	CAGCTCTCCAGTGGACTGTGGATCGAGATTATTTACTTCT	40	100	TTTAGGAGGAAAAAAGAAAAAAGGCAAAAGACAAAAGAACTGCTGTTCGAGGCAG	55	100	A	3	CAGCTCTCCAGTGGACTGTGGATCGAGATTATTTACTTCT	40	100	TTTAGGAGGAAAAAAGAAAAAAGGCAAAAGACAAAAGAACTGCTGTTCGAGGCAG	55	100	64M; 64M; 64M;	A:40:95-23:100 A:40:100-23:100 A:8:0-55:100	tggatggagattatttacttct	51.992	Temperature too low;	ttttttcttttttcctcctaaa	50.273	Temperature too low; Contains too-long poly nucleotide tract;
S14_27852004	T	3	2.73148e-16	1	2	T	3	CAGCTCTCCAGTGGACTGTGGATCGAGATTATTTACTTCTA	41	100	TTAGGAGGAAAAAAGAAAAAAGGCAAAAGACAAAAGAACTGCTGTTCGAGGCAG	54	100	T	3	CAGCTCTCCAGTGGACTGTGGATCGAGATTATTTACTTCTA	41	100	TTAGGAGGAAAAAAGAAAAAAGGCAAAAGACAAAAGAACTGCTGTTCGAGGCAG	54	100	64M; 64M; 64M;	T:41:95-22:100 T:41:100-22:100 T:9:0-54:100	ggatggagattatttacttcta	50.214	Temperature too low;	cttttttcttttttcctcctaa	50.781	Temperature too low; Contains too-long poly nucleotide tract;
S14_27852040	G	2	2.73148e-16	1	2	G	1	TTACTTCTATTTAGGAGGAAAAAAGAAAAAAGGCAAAAGACAAAA	45	100	AACTGCTGTTCGAGGCAG	18	100	G	1	TTACTTCTATTTAGGAGGAAAAAAGAAAAAAGGCAAAAGACAAAA	45	100	AACTGCTGTTCGAGGCAG	18	100	64M; 15S24M2I23M;	G:45:100-18:100	agaaaaaaggcaaaagacaaaa	53.764	Temperature too low; Contains too-long poly nucleotide tract;	gatgctgcctcgaacagcagtt	63.684	Temperature too high; Hairpin stability too high;
S14_27866633		2	3.82568e-18	1	6																	15M1I48M; 15M1I48M;	aaaaggcacaacaaggaccaag	59.832		tgtctatactcaatcctgtgtc	54.763	Temperature too low;
S14_27926237	A	6	7.00307e-26	1	5	A	2	CAGCCA	6	0	TCCAAGTACAATCTTACCAGTGCCAGTTGACCCTGTGAAAGCAAGCTG	48	100	T	4	CAGCCA	6	0	TCCAAGTACAATCTTACCAGTGCCAGTTGACCCTGTGAAAGCAAGCTG	48	100	55M; 55M; 55M; 55M; 55M; 55M;	A:6:0-48:100 T:6:0-48:100 T:6:0-48:95 T:6:0-48:95 T:6:0-48:100 A:6:0-48:100	ttaagattgctctttgcagcca	58.844	Hairpin stability too high;	cactggtaagattgtacttgga	55.482	Temperature too low;
S14_27940442	A	3	2.9211e-17	1	2	A	1	ATCTGGAATCAGGCATTGTATTTTACCTTGAAGCCTTTTTC	41	100	GTTTATTTCAGAGCTTCAGCTG	22	100	A	1	ATCTGGAATCAGGCATTGTATTTTACCTTGAAGCCTTTTTC	41	100	GTTTATTTCAGAGCTTCAGCTG	22	100	64M; 31M2I31M; 31M2I31M;	A:41:100-22:100	attttaccttgaagcctttttc	53.453	Temperature too low;	cagctgaagctctgaaataaac	55.731	Temperature too low; Hairpin stability too high;
S14_27974211	A	4	1.14383e-24	1	0	A	2	CTGCTCCAGCCCAATGGTTGGTCCCCTGTAATTCACATGTACTCATC	47	100	TCATTATTCAATGAAGGGCAATTTTCAGCTCTATGCCATAGATTTAGGCTG	51	100	G	2	CTGCTCCAGCCCAATGGTTGGTCCCCTGTAATTCACATGTACTCATC	47	100	TCATTATTCAATGAAGGGCAATTTTCAGCTCTATGCCATAGATTTAGGCTG	51	100	64M; 64M; 64M; 64M;	A:47:100-16:100 G:47:100-16:100 G:12:100-51:100 A:12:100-51:100	ctgtaattcacatgtactcatc	52.466	Temperature too low;	attgcccttcattgaataatga	54.073	Temperature too low; Hairpin stability too high;
S14_28050345	T	10	7.00307e-26	1	1	T	3	CTGCATCCCAACCACCATCAGGCTCTTT	28	100	CTCTTCAATACCCCTCCTGCCACCTGATGATACATCTTTAGCTG	44	100	C	3	CTGCATCCCAACCACCATCAGGCTCTTT	28	100	CTCTTCAATACCCCTCCTGCCACCTGATGATACATCTTTAGCTG	44	100	64M; 57M7S; 64M; 47M3D17M; 47M3D17M; 47M3D17M; 64M; 64M; 64M; 64M;	C:28:100-35:100 A:28:100-28:100 T:28:100-35:100 T:19:100-44:95 C:19:100-44:95 T:19:100-44:100 C:19:100-44:100	cccaaccaccatcaggctcttt	62.811		tggcaggaggggtattgaagag	61.492
S14_28062211	T	2	6.65319e-17	1	5	T	1	CTT	3	0	CATGTTAGAATTTCTTCAATGAAGATTGCCGAATTTTGAAGTTCATGATTATTGTTGCTG	60	100	C	1	CTT	3	0	CATGTTAGAATTTCTTCAATGAAGATTGCTGAATTTTAAAGTTCATGATTATTGTTGCTG	60	100	64M; 64M;	T:3:0-60:100 C:3:0-60:100	tttcatattcatggtacatctt	50.922	Temperature too low; Hairpin stability too high;	tcattgaagaaattctaacatg	50.523	Temperature too low;
S14_28062241	C	2	6.65319e-17	1	0	C	1	CTTTCATGTTAGAATTTCTTCAATGAAGATTGC	33	100	GAATTTTGAAGTTCATGATTATTGTTGCTG	30	95	T	1	CTTCCATGTTAGAATTTCTTCAATGAAGATTGC	33	100	GAATTTTAAAGTTCATGATTATTGTTGCTG	30	100	64M; 64M;	C:33:100-30:95 T:33:100-30:100	gaatttcttcaatgaagattgc	52.435	Temperature too low;	ataatcatgaactttaaaattc	46.589	GC content too low; Temperature too low;
S14_28062249	A	2	6.65319e-17	1	0	A	1	CTTCCATGTTAGAATTTCTTCAATGAAGATTGCTGAATTTT	41	95	AAGTTCATGATTATTGTTGCTG	22	100	G	1	CTTTCATGTTAGAATTTCTTCAATGAAGATTGCCGAATTTT	41	100	AAGTTCATGATTATTGTTGCTG	22	100	64M; 64M;	G:41:100-22:100 A:41:95-22:100	tcaatgaagattgccgaatttt	55.237	Temperature too low;	cagcaacaataatcatgaactt	53.381	Temperature too low;
S14_28109572	G	2	6.93401e-16	1	0	G	1	CTGCCCATAACTAATGTCTCATTCATCAG	29	100	TCAAGCTGGCAGTGACATTGATGGTGCCAAGGCC	34	100	A	1	CTGCCCATAACTAATGTCTCATTCATCAG	29	100	TCAAGCTGGCAGTGACATTGATGGTGCCAAGGCC	34	100	64M; 64M;	A:29:100-34:100 G:29:100-34:100	taactaatgtctcattcatcag	51.145	Temperature too low;	atcaatgtcactgccagcttga	60.554
S14_28215268	T	7	3.28853e-24	2	0	T	5	CAGCATCATCAGGGTCTGGTTTCGACACCGATAGCAATCGTCCATGTACAGAAAC	55	100	TGAAACCCCACAAAAATCAAGACCAAAGCAAATAGATGGCAG	42	100	G	2	CAGCATCATCAGGGTCTGGTTTCGACACCGATAGCAATCGTCCATGTACAGAAAC	55	100	TGAAACCCCACAAAAATCAAGACCAAAGCAAACAGATGGCAG	42	100	64M; 64M; 64M; 64M; 64M; 64M; 64M;	G:55:100-8:0 T:55:100-8:0 T:21:100-42:100 T:21:100-42:95 T:21:100-42:95 T:21:100-42:100 G:21:100-42:100	gcaatcgtccatgtacagaaac	57.996		tcttgatttttgtggggtttca	56.63	Temperature too low;
S14_28242881	G	2	4.96929e-16	1	5	G	2	CTGCCTCAACCGAACTATGCGCAAGCCCTAGAAGATGACCTATTTCATGCGTAGCAACA	59	100	TCTG	4	0	G	2	CTGCCTCAACCGAACTATGCGCAAGCCCTAGAAGATGACCTATTTCATGCGTAGCAACA	59	100	TCTG	4	0	64M; 64M;	G:59:100-4:0 G:59:100-4:0	acctatttcatgcgtagcaaca	58.394	Hairpin stability too high;	gctaattctatcgatttgcaaa	53.31	Temperature too low;
S14_28319711	T	3	7.62261e-17	1	0	T	2	TAGGGCCGGAGCTGGTAAGGGAAG	24	100	ATTGCTGAAACATGGCCCAGAGAAACATTGCCCCAGCAG	39	95	C	1	TAGGGCCGGAGCTGGTAAGGGAAG	24	100	ATTGCCGAAACATGGCCCAGAGAAACATTGCCCCAGCAG	39	100	64M; 64M; 64M;	T:24:100-39:95 T:24:95-39:95 C:24:100-39:100	gggccggagctggtaagggaag	66.888	Temperature too high;	ctctgggccatgtttcggcaat	63.744	Temperature too high; Hairpin stability too high;
S14_28319717	C	3	7.62261e-17	1	0	C	1	TAGGGCCGGAGCTGGTAAGGGAAGCATTGC	30	95	GAAACATGGCCCAGAGAAACATTGCCCCAGCAG	33	100	T	2	TAGGGCCGGAGCTGGTAAGGGAAGTATTGC	30	100	GAAACATGGCCCAGAGAAACATTGCCCCAGCAG	33	100	64M; 64M; 64M;	T:30:100-33:100 T:30:100-33:100 C:30:95-33:100	gagctggtaagggaagtattgc	58.793		atgtttctctgggccatgtttc	59.172
S14_28354769	C	4	1.27997e-21	1	0	C	3	CAGCTCCGTGTTG	13	100	TCTTAACTGAAGTGAGTTCAAGATCATAGATGTCATAATCTAAAAGATTTGCCATGGCAG	60	100	T	1	CAGCTCCGTGTTG	13	100	CCTTAACTGAAGTGAGTTCAAGATCATAGATGTCATAATCTAAAAGATTT	50	95	64M; 64M; 64M; 64M;	C:13:100-50:95 C:13:100-50:100 T:13:100-50:95 C:3:0-60:100	tagcatccgcagctccgtgttg	65.384	Temperature too high;	cttgaactcacttcagttaaga	53.757	Temperature too low;
S14_28354770	T	4	1.27997e-21	1	0	T	3	CAGCTCCGTGTTGC	14	100	CTTAACTGAAGTGAGTTCAAGATCATAGATGTCATAATCTAAAAGATTTGCCATGGCAG	59	100	C	1	CAGCTCCGTGTTGT	14	93	CTTAACTGAAGTGAGTTCAAGATCATAGATGTCATAATCTAAAAGATTT	49	100	64M; 64M; 64M; 64M;	T:14:100-49:95 T:14:100-49:100 C:14:93-49:100 T:4:0-59:100	agcatccgcagctccgtgttgc	68.331	Temperature too high; Hairpin stability too high;	tcttgaactcacttcagttaag	53.757	Temperature too low;
S14_28371577	A	3	1.02109e-18	2	0	A	2	TGCAAAGCGACCATCACAGTCACCAGTTTGGCAGGCTGGTTGCCA	45	100	TTGGAGTTGAATTTGCAG	18	100	G	1	TGCAAAGCGACCATCACAGTCACCAGTTTGGCAGGCTGGTTGCCA	45	100	TTGGACTTGAATTTGCAG	18	94	64M; 64M; 64M;	A:45:100-18:100 A:45:100-18:94 G:45:100-18:94	cagtttggcaggctggttgcca	66.341	Temperature too high; Hairpin stability too high;	ctggctgcaaattcaactccaa	59.964
S14_28371583	G	3	1.02109e-18	2	0	G	2	TGCAAAGCGACCATCACAGTCACCAGTTTGGCAGGCTGGTTGCCAATTGGA	51	100	TTGAATTTGCAG	12	100	C	1	TGCAAAGCGACCATCACAGTCACCAGTTTGGCAGGCTGGTTGCCAGTTGGA	51	95	TTGAATTTGCAG	12	100	64M; 64M; 64M;	G:51:100-12:100 G:51:95-12:100 C:51:95-12:100	ggcaggctggttgccaattgga	66.188	Temperature too high; Hairpin stability too high;	ccagaactggctgcaaattcaa	59.964
S14_28371650	G	4	9.20573e-18	1	5	G	3	CAGCCAGTTCTGGCCCAAAGCCGGCCACTCCATGTTGGTGGGGCATAGATGCGTCGG	57	100	TCTGGC	6	0	A	1	CAGCCAGTTCTGGCCCAAAGCCGGCCACTCCATGTTGGTGGGGCATAGATGCGTCGG	57	100	TCTGGC	6	0	64M; 64M; 64M; 64M;	A:57:100-6:0 G:57:100-6:0 G:57:100-6:0 G:57:100-6:0	tggtggggcatagatgcgtcgg	66.895	Temperature too high; Hairpin stability too high;	ttcagccttccttcaggccaga	63.633	Temperature too high; Hairpin stability too high;
S14_28408093	C	12	1.84717e-20	1	0	C	9	CTGCAGAGCTCCGCTCATTTCCACTCGGGGCC	32	100	GAGCCCATTCTCTCAGCCCGAGTCTTAAGTCTCGAGCTGGGCTG	44	100	A	3	CTGCAGAGCTCCGCTCATTTCCACTCGGGTCC	32	100	GAGCCCATTCTCTCAGCCCGAGTCTTAAGTCTCGAGCTGGGCTG	44	100	64M; 64M; 64M; 64M; 64M; 64M; 64M; 64M; 64M; 64M; 64M; 64M;	C:32:95-31:100 A:32:100-31:100 C:32:100-31:100 C:32:100-31:100 C:32:100-31:100 C:19:100-44:95 C:19:95-44:100 C:19:95-44:100 C:19:95-44:100 C:19:100-44:100 A:19:95-44:100 A:19:100-44:100	ccgctcatttccactcgggtcc	65.417	Temperature too high;	ctcgggctgagagaatgggctc	64.687	Temperature too high; Hairpin stability too high;
S14_28415565	C	8	1.18387e-21	1	0	C	5	CAGCTGGCGTCTCCTTCTACTGG	23	100	AATCTTCTAGGGTGGTTTCATGTAATGTTGGGGTGTTAGCAG	42	100	A	3	CAGCTGGCGTCTCCTTCTACTGG	23	100	AATCTTCTAGGGTGGTTTCATGTAATGTTGGGGTGTTAGCAG	42	100	64M; 64M; 64M; 64M; 64M; 64M; 64M; 64M;	A:23:100-40:95 A:23:100-40:100 C:23:100-40:95 C:23:100-40:95 C:23:100-40:100 C:23:100-40:100 C:21:100-42:100 A:21:100-42:100	agctggcgtctccttctactgg	63.748	Temperature too high;	catgaaaccaccctagaagatt	55.776	Temperature too low;
S14_28444882	C	5	1.26224e-16	1	5	C	3	GATGCAGA	8	0	AAGACATAGGAAAAGAAAGCATGCTACTACTGCTACTGGATCTTCTGAGGAGCAG	55	100	A	2	CTGCAGA	7	0	AAGACATAGGAAAAGAAAGCATGCTACTACTGCTACTGGATCTTCTGAGGAGCAG	55	100	64M; 63M; 63M; 63M; 63M;	C:8:0-55:100 A:7:0-55:100 C:7:0-55:100 C:7:0-55:100 A:7:0-55:100	tctaccggagcattgctgcaga	64.016	Temperature too high; Hairpin stability too high;	atgctttcttttcctatgtctt	53.691	Temperature too low;
S14_28448817	A	3	1.18387e-21	1	0	A	2	CTGCCATCATCAC	13	100	TCCCCTAACAAAAAAGTCAACATTTTGGACACAATACTACAGTGTGGCAC	50	95	C	1	CTGCCATCATCAC	13	100	TCCCCTCACAAAAAAGTCAACATTTTGGACACAATACTACAGTGTGGCAC	50	95	64M; 64M; 64M;	A:13:100-50:90 A:13:100-50:95 C:13:100-50:95	actctgttgctgccatcatcac	61.198		tgttgactcttttgtgagggga	59.492
S14_28473859	T	6	1.18387e-21	1	2	T	6	GACACACAGTTGGCGGA	17	100	GAGCACATGTCAGTAAAAAAGGAAGGTGATGCTG	34	100	T	6	GACACACAGTTGGCGGA	17	100	GAGCACATGTCAGTAAAAAAGGAAGGTGATGCTG	34	100	52M11S; 52M11S; 52M11S; 52M11S; 52M11S; 52M11S;	T:17:94-34:100 T:17:100-34:100 T:17:100-34:100 T:17:100-34:100 T:17:100-34:100 T:17:94-34:100	gattgctgcaaatgatgacaca	58.16		gacatgtgctcatccgccaact	63.448	Temperature too high;
S14_28478726	G	2	2.20155e-19	1	0	G	1	TCCTCTGTTACTGATCTTGGGATCTTTGTTGATTTATGTCTCCTCCTCAGTC	52	100	CCGCTCTGCAG	11	100	A	1	TCCTCTGTTACTGATCTTGGGATCTTTGTTGATTTATGTCTCCTCCTCAGTC	52	100	CCGCTCTGCAG	11	100	64M; 64M;	G:52:100-11:100 A:52:100-11:100	gatttatgtctcctcctcagtc	55.448	Temperature too low;	ctgtggactggctgcagagcgg	67.8	Temperature too high; Hairpin stability too high;
S14_28512144	T	3	1.20538e-16	1	2	T	2	CAGCTATCCAAAAATCAATTTTAA	24	95	TTTTGAGTCATTTTCTAAACTAAAACTTATTAAAATTTG	39	100	T	2	CAGCTATCCAAAAATCAATTTTAA	24	95	TTTTGAGTCATTTTCTAAACTAAAACTTATTAAAATTTG	39	100	24M2D40M; 64M; 64M;	T:24:95-39:95 T:24:95-39:100	gctatccaaaaatcacttttaa	51.044	Temperature too low;	tagttcagaaaatgactcaaaa	51.622	Temperature too low;
S14_28512145	T	3	1.20538e-16	1	2	T	2	CAGCTATCCAAAAATCAATTTTAAT	25	95	TTTGAGTCATTTTCTAAACTAAAACTTATTAAAATTTG	38	100	T	2	CAGCTATCCAAAAATCAATTTTAAT	25	95	TTTGAGTCATTTTCTAAACTAAAACTTATTAAAATTTG	38	100	24M2D40M; 64M; 64M;	T:25:95-38:95 T:25:95-38:100	ctatccaaaaatcacttttaat	48.46	Temperature too low;	ttagttcagaaaatgactcaaa	51.622	Temperature too low;
S14_28512161	G	6	1.61571e-19	2	0	G	3	CAGCTATCCAAAAATCAATTTTAATTTTTGAGTCATTTTCT	41	100	AACTAAAACTTATTAAAATTTGGAATGTTTGTGAATAGAGCCAAAGGATGTAATCTGCAG	60	100	A	2	CAGCTATCCAAAAATCAATTTTAATTTTTGAGTCATTTTCT	41	100	AACTAAAACTTATTAAAATTTGGAATGTTTGTGAATAGAGCCAAAGGATGTAATCTGCAG	60	100	24M2D40M; 64M; 64M; 64M; 64M; 64M;	A:41:100-22:100 G:41:100-22:95 G:3:0-60:100 A:3:0-60:100 G:3:0-60:95	tttaatttttgagtcattttct	48.482	GC content too low; Temperature too low;	caaattttaataagttttagtt	45.044	GC content too low; Temperature too low;
S14_28512184	G	4	1.20538e-16	1	2	G	3	TCTGAACTAAAACTTATTAAAATTTG	26	100	AATGTTTGTGAATAGAGCCAAAGGATGTAATCTGCAG	37	95	G	3	TCTGAACTAAAACTTATTAAAATTTG	26	100	AATGTTTGTGAATAGAGCCAAAGGATGTAATCTGCAG	37	95	24M2D40M; 64M; 64M; 64M;	G:26:100-37:95 G:26:100-37:95 G:26:95-37:95	aactaaaacttattaaaatttg	45.044	GC content too low; Temperature too low;	tttggctctattcacaagcatt	56.59	Temperature too low;
S14_28512185	A	4	1.20538e-16	1	2	A	3	TCTGAACTAAAACTTATTAAAATTTGG	27	100	ATGTTTGTGAATAGAGCCAAAGGATGTAATCTGCAG	36	95	A	3	TCTGAACTAAAACTTATTAAAATTTGG	27	100	ATGTTTGTGAATAGAGCCAAAGGATGTAATCTGCAG	36	95	24M2D40M; 64M; 64M; 64M;	A:27:100-36:95 A:27:100-36:95 A:27:95-36:95	actaaaacttattaaaatttgg	46.692	GC content too low; Temperature too low;	ctttggctctattcacaagcat	57.022
S14_28516333	C	6	1.18387e-21	1	0	C	5	TCAGATTGAAG	11	100	TCTTGGATTCGCTTCTTCAGGCCCACCCCTCTCCGTTCTGCATATCTCGCAG	52	100	G	1	TCAGATTGAAG	11	100	TCTTGGATTCGCTTCTTCAGGCCCACCACTCTCCGTTCTGCATATCTCGCAG	52	100	64M; 64M; 64M; 64M; 64M; 64M;	C:11:100-52:100 C:11:100-52:95 C:11:100-52:95 G:11:100-52:100 C:11:100-52:100 C:11:100-52:95	ctatatccatctcagattgaag	51.092	Temperature too low;	gcctgaagaagcgaatccaaga	60.937
S14_28532928	G	5	1.38057e-18	1	0	G	4	CTGCAGATTTGTGGTTGATGGCTTTC	26	100	GGTTCCTCGGAGCTCTGGGCGATGGGTTTTCCATGCC	37	100	C	1	CTGCAGATTTGTGGTTGATGGCTTTC	26	100	GGTTCCTCGGAGCTCTGGGTGATGGGTTTTCCATGCC	37	100	64M; 64M; 64M; 64M; 64M;	C:26:100-37:100 G:26:100-37:95 G:26:100-37:95 G:26:100-37:100 G:26:100-37:100	agatttgtggttgatggctttc	57.474		tcacccagagctccgaggaacc	65.678	Temperature too high;
S14_28532980	T	4	7.13659e-18	1	0	T	3	CCGGTGGTTTTGTATG	16	100	GACCAGCGAGATTATGAATAGTATCGGCAGTTCCTCAACTTCTGCTG	47	100	C	1	CCGGTGGTTTTGTATG	16	100	CACCAGCGAGATTATGAATAATATCGGCAGTTCCTCAACTTCTGCTG	47	95	64M; 64M; 64M; 64M;	T:16:100-47:100 T:16:100-47:100 C:16:100-47:95 T:16:100-47:100	tccatgccggtggttttgtatg	61.462		attattcataatctcgctggtc	53.881	Temperature too low;
S14_28532981	G	4	7.13659e-18	1	0	G	3	CCGGTGGTTTTGTATGT	17	100	ACCAGCGAGATTATGAATAGTATCGGCAGTTCCTCAACTTCTGCTG	46	100	C	1	CCGGTGGTTTTGTATGC	17	94	ACCAGCGAGATTATGAATAATATCGGCAGTTCCTCAACTTCTGCTG	46	100	64M; 64M; 64M; 64M;	G:17:100-46:95 G:17:100-46:100 C:17:94-46:100 G:17:100-46:100	ccatgccggtggttttgtatgt	61.722		tattattcataatctcgctggt	52.588	Temperature too low;
S14_28537987	A	7	1.18387e-21	1	0	A	5	CAGCCAACGCTCACGATTTCATTGCAGGACT	31	100	AAAAATGGCTATGATACGTGGTGTGGTGACAGAGGAGTACAACTCTCCGGTGGGCAGAAGCAG	63	100	T	2	CAGCCAACGCTCACGATTTCATTGCGGGACT	31	100	AAAAATGGCTATGATACGTGGTGTGGTGACAGAGGAGTACAACTCTCCGGTGGGCAGAAGCAG	63	100	64M; 64M; 64M; 64M; 64M; 64M; 64M;	A:31:95-32:95 A:31:100-32:100 T:31:100-32:100 T:0:0-63:100 A:0:0-63:100 A:0:0-63:95 A:0:0-63:100	ctcacgatttcattgcgggact	61.252		accacgtatcatagccattttt	56.128	Temperature too low;
S14_28604144	C	4	1.84717e-20	2	0	C	2	CAGCATTTATACCTGTCCTTCACTAACAATAGCGCCAAGCCTGCAACCTTCTTC	54	100	AGTGGATCTGAAATTTTGATGCTTTTACTCCATTGAATGAGTTTTTCCACGAATTTTGCTG	61	100	T	2	CAGCATTTATACCTGTCCTTCACTAACAATAGCGCCAAGCCTGCAACCTTCTTC	54	100	AGTGGATCTGAAATTTTCATGCTTTTACTCCATTGAATGAGTTTTTCCACGAATTTTGCTG	61	95	64M; 64M; 64M; 64M;	C:54:100-9:0 T:54:100-9:0 C:2:0-61:100 T:2:0-61:95	cgccaagcctgcaaccttcttc	64.744	Temperature too high;	gcatcaaaatttcagatccact	55.316	Temperature too low;
S14_28604162	G	2	4.54826e-16	2	0	G	1	TCCAGTGGATCTGAAATTTT	20	100	ATGCTTTTACTCCATTGAATGAGTTTTTCCACGAATTTTGCTG	43	100	C	1	TCTAGTGGATCTGAAATTTT	20	95	ATGCTTTTACTCCATTGAATGAGTTTTTCCACGAATTTTGCTG	43	100	64M; 64M;	G:20:100-43:100 C:20:95-43:100	cttccagtggatctgaaatttt	54.613	Temperature too low;	tcattcaatggagtaaaagcat	54.044	Temperature too low;
S14_28605093	T	5	1.84717e-20	1	0	T	2	CTGCAAGGGCCCATAAAAGATAAATGAGAAGGGGAAAAAATAGCATTAAC	50	100	TTTCCAGGAAAGATGCAGGTAGATGATAAACTAATACCTTGATCGTTTGAGCTG	54	100	C	3	CTGCAAGGGCCCATAAAAGATAAATGAGAAGGGGAAAAAATAGCATTAAC	50	100	TTTCCAGGAAAGATGCAGGTAGATGATAGACTAATACCTTGATCGTTTGAGCTG	54	100	64M; 64M; 64M; 64M; 64M;	C:50:100-13:100 T:50:100-13:100 C:9:0-54:100 T:9:0-54:100 C:9:0-54:100	aaggggaaaaaatagcattaac	52.939	Temperature too low; Contains too-long poly nucleotide tract;	ctacctgcatctttcctggaaa	58.045
S14_28646417	G	3	4.04509e-16	1	5	G	2	CTGCAAAT	8	0	CTGTGAAGGGGTTGGAGGGAGAGGGAGATTATTGTTATTATTTTGACAGTGAAAC	55	100	T	1	CTGCAAAT	8	0	CTGTGAAGGTGTTGGAGGGAGAGGGAGATTATTGTTATTATTTTGACAGTGAAAC	55	100	64M; 64M; 64M;	G:8:0-55:95 G:8:0-55:100 T:8:0-55:100	ccaatcatcggctgctgcaaat	62.417		tctccctccaacaccttcacag	61.615
S14_28669930	A	3	9.69001e-23	2	0	A	2	GAAACAGGGCCTCCATGTGCTTATCCAGAATCCCACGG	38	100	CTAGGCCACGTTCTTGCAAACGCTG	25	100	G	1	GAAACAGGGCCTCCATGTGCTTATCCAGAATCCCACGG	38	100	CTAGGCCACGTTCTTGCAAACGCTG	25	100	64M; 64M; 64M;	G:38:100-25:100 A:38:100-25:100 A:38:90-25:100	gtgcttatccagaatcccacgg	61.065		cgtttgcaagaacgtggcctag	62.553
S14_28669969	A	3	2.20155e-19	1	0	A	1	CTGCCTCGTCCGTCCA	16	100	CCACCTGCATCACCTCTCTGTACGCATCTGCATTGCTGGCCAAGTCA	47	100	G	2	CTGCCTCGTCCGTCCA	16	100	CCACCTGCATCACCTCTCTGTACGCATCTGCATTGCTGGCCAAGTCA	47	100	64M; 64M; 64M;	A:16:100-47:100 G:16:100-47:100 G:16:94-47:100	caaacgctgcctcgtccgtcca	67.683	Temperature too high;	tacagagaggtgatgcaggtgg	61.476
S14_28670034	G	3	1.27976e-19	2	0	G	2	AGATCAACGACGGATA	16	100	AAACAAAAGTACTTTAACTCGTCCGGGTCCAGTGACATGGCTCGCTG	47	100	A	1	AGATCAACGACGGATA	16	100	AAACAAAAGTACTTTAACTCGTCCGGGTCCAGTGACATAGCTCGCTG	47	100	64M; 64M; 64M;	G:16:100-47:100 G:16:94-47:90 A:16:100-47:100	agtcaaagatcaacgacggata	57.286		acgagttaaagtacttttgttt	52.239	Temperature too low;
S14_28670073	G	3	1.27976e-19	2	5	G	2	AGATCAACGACGGATAGAAACAAAAGTACTTTAACTCGTCCGGGTCCAGTGACAT	55	100	GCTCGCTG	8	0	A	1	AGATCAACGACGGATAAAAACAAAAGTACTTTAACTCGTCCGGGTCCAGTGACAT	55	100	GCTCGCTG	8	0	64M; 64M; 64M;	G:55:100-8:0 G:55:100-8:0 A:55:100-8:0	actcgtccgggtccagtgacat	65.35	Temperature too high;	cgttggagcccgtgcagcgagc	70.896	Temperature too high; Hairpin stability too high;
S14_28677625	A	15	2.0402e-19	2	3																	64M; 64M; 64M; 64M; 64M; 64M; 64M; 64M; 64M; 64M; 64M; 64M; 64M; 64M; 64M;	G:42:95-21:100 G:42:90-21:100 G:42:95-21:100 G:42:95-21:100 G:42:100-21:100 G:42:100-21:100 G:42:100-21:100 G:42:95-21:100 G:42:95-21:100 G:42:95-21:100 G:42:90-21:100 G:42:95-21:100 G:42:90-21:100 G:42:90-21:100 C:42:95-21:100	ttctgttccatctccatttccc	58.032		gctgcaagagagcttctaatgg	59.387
S14_28686983	T	3	8.05804e-16	1	0	T	2	CTGCAGAAATGTCCACTGGCTTCCACCTATCCTTCAA	37	100	AGCATGTCAACCCAATAACTATTAAG	26	100	G	1	CTGCAGAAATGTCCACTGGCTTCCACCTATCCTTCAA	37	100	AGCATGTCAACCCAATAACTATTAAG	26	100	64M; 64M; 64M;	G:37:100-26:100 T:37:100-26:100 T:37:100-26:100	ctggcttccacctatccttcaa	59.76		atagttattgggttgacatgct	55.48	Temperature too low;
S14_28747245	T	4	1.27976e-19	2	0	T	3	ATTCTTCCTGCAGATGCTCGTCTTCTTGATGGTGATCCA	39	100	TGAAAATTGATCAGGTCTTTGCAG	24	100	A	1	ATTCTTCCTGCAGATGCTCGTCTTCTTGATGGCGATCCA	39	100	TGAAAATTGACCAGGTCTTTGCAG	24	100	64M; 64M; 64M; 64M;	T:39:95-24:95 T:39:95-24:100 T:39:100-24:100 A:39:100-24:100	tcgtcttcttgatggcgatcca	61.788	Hairpin stability too high;	gcaaagacctggtcaattttca	57.679
S14_28791319	C	6	1.18387e-21	1	0	C	4	CTGCAGTTGGTTGCATGGAATGTGTCCTCGATATTGGAATTTGGATGCT	49	100	CAGTTCCAATTCCGCAG	17	94	T	2	CTGCAGTTGGTTGCATGGAATGTGTCCTCGATATTGGAATTTGGATGCT	49	100	CAGTTCCAATTCCGCAG	17	94	64M; 64M; 64M; 64M; 64M; 64M;	C:49:100-14:86 C:49:100-14:93 T:49:100-14:93 T:46:100-17:94 C:46:100-17:94 C:46:100-17:88	ttgatattggaatttggatgct	54.073	Temperature too low;	agaagctgtggaattggaactg	58.848
S14_28824733	T	3	1.75895e-17	1	0	T	2	CTGCCATATCCTCCAACACCTACACAATATTTGATGTCAAAATTCTCCGT	50	100	GATTGGATTATGT	13	100	C	1	CTGCCATATCCTCCAACACCTACACAATATTTGATGTCAAAATTCTCCGT	50	100	GATTGGATTATGT	13	100	64M; 64M; 64M;	C:50:100-13:100 T:50:100-13:100 T:50:95-13:100	atttgatgtcaaaattctccgt	54.627	Temperature too low; Hairpin stability too high;	cttaccaagacataatccaatc	52.376	Temperature too low;
S14_28824749	T	2	1.73107e-17	1	5	T	1		0	0	GGTAAGCAATTGTTCCATCATAGTCCCATACGGAGAACAAATCTCCCCTTCTTGTTTCTGCTG	63	100	T	1		0	0	GGTAAGCAATTGTTCCATCATAGTCCCATACGGAGAACAAATCTCCCCTTCTTGTTTCTGCTG	63	100	36M1D28M; 64M;	T:0:0-63:100	ctccgttgattggattatgtct	55.965	Temperature too low;	tatgatggaacaattgcttacc	54.501	Temperature too low; Hairpin stability too high;
S14_28824784	G	2	1.73107e-17	1	2	G	1	TGGTAAGCAATTGTTCCATCATAGTCCCATACGGA	35	100	AACAAATCTCCCCTTCTTGTTTCTGCTG	28	100	G	1	TGGTAAGCAATTGTTCCATCATAGTCCCATACGGA	35	100	AACAAATCTCCCCTTCTTGTTTCTGCTG	28	100	36M1D28M; 64M;	G:35:100-28:100	ttccatcatagtcccatacgga	58.148		aaacaagaaggggagatttgtt	56.069	Temperature too low;
S14_28881805		3	2.79749e-19	1	6																	4M1I30M1D29M; 4M1I59M; 28M1D34M2S;	ggtttcttgtcctctgctgcga	63.061	Temperature too high;	atagtctcaatgggcacatctc	57.651
S14_28881810	T	4	2.79749e-19	1	5	T	1	GATG	4	0	GCCCATTGACACTATTCCTTGCCGTGTTGTGGGGAACAGTAGTTGAAGTTTAGGCTG	57	95	T	1	GATG	4	0	GCCCATTGACACTATTCCTTGCCGTGTTGTGGGGAACAGTAGTTGAAGTTTAGGCTG	57	95	4M1I30M1D29M; 4M1I59M; 28M1D34M2S; 62M2S;	T:4:0-57:95	cttgtcctctgctgcgatgaga	62.353		aaggaatagtctcaatgggcac	58.109
S14_28881811	G	4	1.84717e-20	1	5	G	1	GATGT	5	0	CCCATTGACACTATTCCTTGCCGTGTTGTGGGGAACAGTAGTTGAAGTTTAGGCTG	56	95	G	1	GATGT	5	0	CCCATTGACACTATTCCTTGCCGTGTTGTGGGGAACAGTAGTTGAAGTTTAGGCTG	56	95	4M1I30M1D29M; 4M1I59M; 28M1D34M2S; 62M2S;	G:5:0-56:95	ttgtcctctgctgcgatgagat	61.796		caaggaatagtctcaatgggca	58.11
S14_28881833	C	4	2.79749e-19	1	2	C	1	GATGTGCCCATTGACACTATTCCTTGC	27	95	GTGTTGTGGGGAACAGTAGTTGAAGTTTAGGCTG	34	95	C	1	GATGTGCCCATTGACACTATTCCTTGC	27	95	GTGTTGTGGGGAACAGTAGTTGAAGTTTAGGCTG	34	95	4M1I30M1D29M; 4M1I59M; 28M1D34M2S; 62M2S;	C:27:95-34:95	gtgcccattgagactattcctt	58.109		agtactgttccccacaacacgg	62.443
S14_28881834	G	4	1.84717e-20	1	2	G	1	GATGTGCCCATTGACACTATTCCTTGCC	28	95	TGTTGTGGGGAACAGTAGTTGAAGTTTAGGCTG	33	95	G	1	GATGTGCCCATTGACACTATTCCTTGCC	28	95	TGTTGTGGGGAACAGTAGTTGAAGTTTAGGCTG	33	95	4M1I30M1D29M; 4M1I59M; 28M1D34M2S; 62M2S;	G:28:95-33:95	tgcccattgagactattccttg	58.11		aagtactgttccccacaacacg	60.744
S14_28881862	A	3	1.84717e-20	1	5	A	1	GATGTGCCCATTGACACTATTCCTTGCCGTGTTGTGGGGAACAGTAGTTGAAGTTT	56	95	GGCTG	5	0	A	1	GATGTGCCCATTGACACTATTCCTTGCCGTGTTGTGGGGAACAGTAGTTGAAGTTT	56	95	GGCTG	5	0	4M1I30M1D29M; 28M1D34M2S; 62M2S;	A:56:95-5:0	tgtggggaacagtacttgaagt	59.225		ccatatacagtggtgatgccta	57.11

## Sheet: ColumnHeaderDefinitions
Parameter	Definition
marker	Marker name
refallele	Reference allele
num_tags	Number of GBS tags covering the SNP
pvalue	p_value from fisher's exact test of linkage with the anchor marker
phase	1 if minor allele is in phase with anchor marker, 2 if minor allele is in opposite phase with anchor marker. Anchor markers are the markers used to make the curated genetic map
reject_code	Code for rejection of a SNP: 1. SNP with more than 2 alleles; 2. SNP with less than 2 alleles; 3. reference allele does not pass filter; 4. failed alignment of sequence flanking the ref allele to reference; 5. failed alignment of sequence flanking the alt allele to reference; 6 no allele passed filter
a1	SNP Allele 1
count	number of tags assiged to allele1
lseq	5' flanking sequence based on GBS tag
lseq_len	lseq length
lseq_pct	percentage of 5' flanking sequence matching to reference
rseq	3' flanking sequence based on GBS tag
rseq_len	rseq length
rseq_pct	percentage of 3' flanking sequence matching to reference
a2	SNP Allele 2
count	number of tags assiged to allele2
lseq	5' flanking sequence based on GBS tag
lseq_len	lseq length
lseq_pct	percentage of 5' flanking sequence matching to reference
rseq	3' flanking sequence based on GBS tag
rseq_len	rseq length
rseq_pct	percentage of 3' flanking sequence matching to reference
all_cigars	CIGAR line representation of alignment of each GBS tag to reference genome
all_records	All Tags alignment information for this SNP
lprimer	Left primer sequence
ltemp	Left primer annealing temperatures
lproblem	Left primer prediction problem
rprimer	Right primer sequence
rtemp	Right primer annealing tempeartures
rproblem	Right primer prediction problem
