# Supplementary material for: Computational Analysis of AmpSeq Data for Targeted, High-Throughput Genotyping of Amplicons
Source: Front Plant Sci. 2019 May 14;10:599. doi: 10.3389/fpls.2019.00599 (PMC6528068; doi:10.3389/fpls.2019.00599)
Supplement: FILE S2 — Output of markers in the relevant chromosomes from paired-ended sequencing data of two parents (Parent1 and 2) and 10 progenies (Progeny01 to 10) for which amplicons targeted the powdery mildew resistance loci RUN1 (chr12), REN1 (chr13), REN6 (chr9), and REN7 (chr19) and the downy mildew resistance locus RPV12 (chr14). These data are available at: https://github.com/JFresnedo/AmpSeq/tree/master/2_SNP_calling/. [file Table_2.XLSX]

## Sheet: Sheet1
##fileformat=VCFv4.2
##FILTER=<ID=LowQual,Description="Low quality">
##FORMAT=<ID=AD,Number=R,Type=Integer,Description="Allelic depths for the ref and alt alleles in the order listed">
##FORMAT=<ID=DP,Number=1,Type=Integer,Description="Approximate read depth (reads with MQ=255 or with bad mates are filtered)">
##FORMAT=<ID=GQ,Number=1,Type=Integer,Description="Genotype Quality">
##FORMAT=<ID=GT,Number=1,Type=String,Description="Genotype">
##FORMAT=<ID=PL,Number=G,Type=Integer,Description="Normalized, Phred-scaled likelihoods for genotypes as defined in the VCF specification">
##GATKCommandLine=<ID=HaplotypeCaller,CommandLine="HaplotypeCaller --output Output/merged.vcf --input Output/merged.clean.bam --reference Indexed_Genome/grapevine_12Xv2_Chr9_12_13_14_19.fa --gvcf-gq-bands 1 --gvcf-gq-bands 2 --gvcf-gq-bands 3 --gvcf-gq-bands 4 --gvcf-gq-bands 5 --gvcf-gq-bands 6 --gvcf-gq-bands 7 --gvcf-gq-bands 8 --gvcf-gq-bands 9 --gvcf-gq-bands 10 --gvcf-gq-bands 11 --gvcf-gq-…
##INFO=<ID=AC,Number=A,Type=Integer,Description="Allele count in genotypes, for each ALT allele, in the same order as listed">
##INFO=<ID=AF,Number=A,Type=Float,Description="Allele Frequency, for each ALT allele, in the same order as listed">
##INFO=<ID=AN,Number=1,Type=Integer,Description="Total number of alleles in called genotypes">
##INFO=<ID=BaseQRankSum,Number=1,Type=Float,Description="Z-score from Wilcoxon rank sum test of Alt Vs. Ref base qualities">
##INFO=<ID=DP,Number=1,Type=Integer,Description="Approximate read depth; some reads may have been filtered">
##INFO=<ID=DS,Number=0,Type=Flag,Description="Were any of the samples downsampled?">
##INFO=<ID=ExcessHet,Number=1,Type=Float,Description="Phred-scaled p-value for exact test of excess heterozygosity">
##INFO=<ID=FS,Number=1,Type=Float,Description="Phred-scaled p-value using Fisher's exact test to detect strand bias">
##INFO=<ID=InbreedingCoeff,Number=1,Type=Float,Description="Inbreeding coefficient as estimated from the genotype likelihoods per-sample when compared against the Hardy-Weinberg expectation">
##INFO=<ID=MLEAC,Number=A,Type=Integer,Description="Maximum likelihood expectation (MLE) for the allele counts (not necessarily the same as the AC), for each ALT allele, in the same order as listed">
##INFO=<ID=MLEAF,Number=A,Type=Float,Description="Maximum likelihood expectation (MLE) for the allele frequency (not necessarily the same as the AF), for each ALT allele, in the same order as listed">
##INFO=<ID=MQ,Number=1,Type=Float,Description="RMS Mapping Quality">
##INFO=<ID=MQRankSum,Number=1,Type=Float,Description="Z-score From Wilcoxon rank sum test of Alt vs. Ref read mapping qualities">
##INFO=<ID=QD,Number=1,Type=Float,Description="Variant Confidence/Quality by Depth">
##INFO=<ID=ReadPosRankSum,Number=1,Type=Float,Description="Z-score from Wilcoxon rank sum test of Alt vs. Ref read position bias">
##INFO=<ID=SOR,Number=1,Type=Float,Description="Symmetric Odds Ratio of 2x2 contingency table to detect strand bias">
##contig=<ID=chr9,length=23006712>
##contig=<ID=chr12,length=24269032>
##contig=<ID=chr13,length=29075116>
##contig=<ID=chr14,length=30274277>
##contig=<ID=chr19,length=24695667>
##source=HaplotypeCaller
#CHROM	POS	ID	REF	ALT	QUAL	FILTER	INFO	FORMAT	Parent1_B10_R1	Parent1_B10_R2	Parent2_C12_R1	Parent2_C12_R2	Progeny01_H01_R1	Progeny01_H01_R2	Progeny02_F02_R1	Progeny02_F02_R2	Progeny03_G02_R1	Progeny03_G02_R2	Progeny04_H02_R1	Progeny04_H02_R2	Progeny05_A03_R1	Progeny05_A03_R2	Progeny06_B03_R1	Progeny06_B03_R2	Progeny07_C03_R1	Progeny07_C03_R2	Progeny08_D03_R1	Progeny08_D03_R2	Progeny09_E03_R1	Progeny09_E03_R2	Progeny10_F03_R1	Progeny10_F03_R2
chr9	2222052	.	G	A	722.2	.	AC=8;AF=0.500;AN=16;BaseQRankSum=1.658;DP=34;ExcessHet=20.0237;FS=0.000;MLEAC=18;MLEAF=1.00;MQ=58.61;MQRankSum=-3.026;QD=24.90;ReadPosRankSum=3.741;SOR=0.941	GT:AD:DP:GQ:PL	./.	./.	0/1:1,2:3:32:73,0,32	./.	0/1:2,3:5:66:107,0,66	./.	0/1:2,1:3:32:32,0,73	./.	0/1:4,6:10:99:215,0,129	./.	./.	./.	./.	./.	0/1:1,1:2:4:35,0,4	./.	0/1:2,2:4:69:69,0,69	./.	0/1:2,2:4:69:69,0,69	./.	./.	./.	0/1:1,2:3:32:73,0,32	./.
chr9	2222054	.	A	G	1153.88	.	AC=12;AF=0.750;AN=16;BaseQRankSum=-0.609;DP=34;ExcessHet=5.1188;FS=0.000;MLEAC=25;MLEAF=1.00;MQ=58.61;MQRankSum=-1.559;QD=33.94;ReadPosRankSum=1.346;SOR=2.899	GT:AD:DP:GQ:PL	./.	./.	0/1:1,2:3:32:73,0,32	./.	1/1:0,5:5:15:196,15,0	./.	0/1:1,2:3:32:73,0,32	./.	0/1:3,7:10:92:255,0,92	./.	./.	./.	./.	./.	1/1:0,2:2:6:82,6,0	./.	1/1:0,4:4:12:163,12,0	./.	0/1:1,3:4:29:110,0,29	./.	./.	./.	1/1:0,3:3:9:122,9,0	./.
chr9	6143229	.	AG	A	52.92	.	AC=3;AF=0.079;AN=38;BaseQRankSum=0.686;DP=124;ExcessHet=3.3775;FS=0.000;InbreedingCoeff=-0.1312;MLEAC=3;MLEAF=0.079;MQ=42.48;MQRankSum=3.859;QD=3.78;ReadPosRankSum=-2.629;SOR=0.811	GT:AD:DP:GQ:PL	0/0:5,0:5:15:0,15,201	0/1:12,2:14:37:37,0,442	./.	0/1:2,1:3:30:30,0,72	0/0:2,0:2:6:0,6,80	0/0:9,0:9:27:0,27,363	./.	0/0:5,0:5:15:0,15,202	./.	0/1:10,1:11:6:6,0,370	./.	0/0:2,0:2:6:0,6,80	0/0:4,0:4:12:0,12,161	0/0:13,0:13:39:0,39,524	0/0:1,0:1:3:0,3,40	0/0:9,0:9:27:0,27,363	0/0:2,0:2:6:0,6,85	0/0:11,0:11:33:0,33,444	0/0:2,0:2:6:0,6,81	0/0:17,1:18:15:0,15,646	./.	0/0:8,0:8:24:0,24,323	0/0:2,0:2:6:0,6,81	0/0:3,0:3:9:0,9,128
chr9	6143234	.	T	G	3040.87	.	AC=34;AF=0.944;AN=36;BaseQRankSum=3.539;DP=76;ExcessHet=3.1362;FS=0.000;InbreedingCoeff=-0.0837;MLEAC=42;MLEAF=1.00;MQ=51.09;MQRankSum=1.868;QD=31.84;ReadPosRankSum=-0.335;SOR=2.432	GT:AD:DP:GQ:PL	1/1:0,5:5:15:143,15,0	1/1:0,11:11:33:449,33,0	./.	1/1:0,3:3:9:127,9,0	1/1:0,2:2:6:52,6,0	1/1:0,5:5:15:204,15,0	./.	1/1:0,3:3:9:118,9,0	./.	1/1:0,4:4:12:167,12,0	./.	./.	1/1:0,4:4:12:114,12,0	1/1:0,7:7:21:285,21,0	1/1:0,1:1:3:27,3,0	1/1:0,7:7:21:285,21,0	0/1:1,1:2:4:21,0,4	1/1:0,3:3:9:127,9,0	1/1:0,2:2:6:64,6,0	1/1:0,8:8:24:322,24,0	./.	1/1:0,5:5:15:204,15,0	1/1:0,2:2:6:68,6,0	0/1:1,1:2:4:35,0,4
chr9	8590611	.	T	G	2478.48	.	AC=11;AF=0.500;AN=22;BaseQRankSum=0.023;DP=126;ExcessHet=0.0171;FS=0.000;InbreedingCoeff=0.8142;MLEAC=20;MLEAF=0.909;MQ=51.72;MQRankSum=6.231;QD=33.95;ReadPosRankSum=0.570;SOR=0.725	GT:AD:DP:GQ:PL	0/1:9,3:12:86:86,0,309	./.	./.	./.	0/0:18,0:18:53:0,53,653	./.	0/0:7,0:7:21:0,21,285	./.	0/0:7,0:7:21:0,21,285	./.	1/1:0,14:14:42:556,42,0	./.	1/1:0,14:14:42:571,42,0	./.	0/0:8,0:8:24:0,24,308	./.	1/1:0,12:12:36:458,36,0	./.	1/1:0,10:10:30:376,30,0	./.	0/0:13,0:13:39:0,39,521	./.	1/1:0,11:11:33:411,33,0	./.
chr9	8678841	.	T	A	289.04	.	AC=6;AF=1.00;AN=6;DP=8;ExcessHet=3.0103;FS=0.000;MLEAC=17;MLEAF=1.00;MQ=25.00;QD=27.31;SOR=4.407	GT:AD:DP:GQ:PL	./.	./.	1/1:0,2:2:6:60,6,0	./.	./.	./.	1/1:0,4:4:12:119,12,0	./.	1/1:0,2:2:6:60,6,0	./.	./.	./.	./.	./.	./.	./.	./.	./.	./.	./.	./.	./.	./.	./.
chr9	8678986	.	C	A	410.04	.	AC=6;AF=1.00;AN=6;DP=8;ExcessHet=3.0103;FS=0.000;MLEAC=17;MLEAF=1.00;MQ=31.00;QD=26.20;SOR=4.407	GT:AD:DP:GQ:PL	./.	./.	./.	1/1:0,2:2:6:90,6,0	./.	./.	./.	1/1:0,4:4:12:180,12,0	./.	1/1:0,2:2:6:90,6,0	./.	./.	./.	./.	./.	./.	./.	./.	./.	./.	./.	./.	./.	./.
chr9	8678997	.	A	T	410.04	.	AC=6;AF=1.00;AN=6;DP=8;ExcessHet=3.0103;FS=0.000;MLEAC=17;MLEAF=1.00;MQ=31.00;QD=27.50;SOR=4.407	GT:AD:DP:GQ:PL	./.	./.	./.	1/1:0,2:2:6:90,6,0	./.	./.	./.	1/1:0,4:4:12:180,12,0	./.	1/1:0,2:2:6:90,6,0	./.	./.	./.	./.	./.	./.	./.	./.	./.	./.	./.	./.	./.	./.
chr9	8679001	.	G	A	410.04	.	AC=6;AF=1.00;AN=6;DP=8;ExcessHet=3.0103;FS=0.000;MLEAC=17;MLEAF=1.00;MQ=31.00;QD=33.97;SOR=4.407	GT:AD:DP:GQ:PL	./.	./.	./.	1/1:0,2:2:6:90,6,0	./.	./.	./.	1/1:0,4:4:12:180,12,0	./.	1/1:0,2:2:6:90,6,0	./.	./.	./.	./.	./.	./.	./.	./.	./.	./.	./.	./.	./.	./.
chr9	9730731	.	G	T	56.36	.	AC=9;AF=0.500;AN=18;BaseQRankSum=-2.872;DP=13;ExcessHet=0.0566;FS=0.000;MLEAC=10;MLEAF=0.556;MQ=20.08;MQRankSum=-0.615;QD=18.79;ReadPosRankSum=0.000;SOR=0.569	GT:AD:DP:GQ:PL	./.	1/1:0,1:1:3:10,3,0	./.	./.	./.	1/1:0,1:1:3:10,3,0	./.	0/0:2,0:2:6:0,6,34	./.	0/0:1,0:1:3:0,3,25	./.	./.	./.	1/1:0,1:1:3:10,3,0	./.	1/1:0,1:1:3:10,3,0	./.	0/1:1,2:3:11:11,0,17	./.	0/0:1,0:1:3:0,3,26	./.	0/0:2,0:2:6:0,6,49	./.	./.
chr9	9730735	.	T	C	54.89	.	AC=2;AF=0.125;AN=16;BaseQRankSum=1.097;DP=13;ExcessHet=0.1472;FS=0.000;MLEAC=3;MLEAF=0.188;MQ=20.08;MQRankSum=-0.230;QD=27.44;ReadPosRankSum=0.000;SOR=0.086	GT:AD:DP:GQ:PL	./.	0/0:1,0:1:3:0,3,10	./.	./.	./.	0/0:1,0:1:3:0,3,10	./.	./.	./.	0/0:1,0:1:3:0,3,25	./.	./.	./.	0/0:1,0:1:3:0,3,10	./.	0/0:1,0:1:3:0,3,25	./.	0/0:3,0:3:9:0,9,74	./.	0/0:1,0:1:3:0,3,26	./.	1/1:0,2:2:6:49,6,0	./.	./.
chr9	10530278	.	C	T	93.6	.	AC=4;AF=0.091;AN=44;BaseQRankSum=0.689;DP=217;ExcessHet=0.0037;FS=0.000;InbreedingCoeff=0.7869;MLEAC=2;MLEAF=0.045;MQ=58.90;MQRankSum=-2.109;QD=28.04;ReadPosRankSum=-2.550;SOR=2.791	GT:AD:DP:GQ:PL	./.	1/1:0,1:1:3:41,3,0	0/0:19,0:19:56:0,56,678	0/0:12,0:12:35:0,35,412	0/0:11,0:11:33:0,33,417	0/0:4,0:4:12:0,12,163	0/0:22,0:22:66:0,66,843	0/0:8,0:8:24:0,24,326	0/0:18,0:18:54:0,54,730	0/0:9,0:9:27:0,27,367	0/0:11,0:11:33:0,33,425	0/0:8,0:8:23:0,23,264	./.	1/1:0,2:2:6:82,6,0	0/0:8,0:8:23:0,23,260	0/0:5,0:5:15:0,15,173	0/0:13,0:13:39:0,39,530	0/0:4,0:4:12:0,12,163	0/0:11,0:11:33:0,33,433	0/0:8,0:8:24:0,24,326	0/0:12,0:12:36:0,36,458	0/0:9,0:9:27:0,27,367	0/0:14,0:14:42:0,42,516	0/0:8,0:8:24:0,24,326
chr9	10530291	.	C	T	9318.35	.	AC=44;AF=1.00;AN=44;DP=213;ExcessHet=3.0103;FS=0.000;InbreedingCoeff=-0.0174;MLEAC=47;MLEAF=1.00;MQ=58.88;QD=32.38;SOR=1.501	GT:AD:DP:GQ:PL	./.	1/1:0,1:1:3:45,3,0	1/1:0,19:19:57:855,57,0	1/1:0,12:12:36:514,36,0	1/1:0,11:11:33:495,33,0	1/1:0,4:4:12:180,12,0	1/1:0,22:22:66:990,66,0	1/1:0,8:8:24:360,24,0	1/1:0,18:18:54:810,54,0	1/1:0,9:9:27:405,27,0	1/1:0,11:11:33:495,33,0	1/1:0,7:7:21:315,21,0	./.	1/1:0,2:2:6:90,6,0	1/1:0,8:8:24:360,24,0	1/1:0,4:4:12:180,12,0	1/1:0,13:13:39:585,39,0	1/1:0,4:4:12:180,12,0	1/1:0,11:11:33:495,33,0	1/1:0,6:6:18:270,18,0	1/1:0,12:12:36:540,36,0	1/1:0,9:9:27:405,27,0	1/1:0,14:14:42:630,42,0	1/1:0,8:8:24:334,24,0
chr9	10530292	.	A	G	9728.69	.	AC=44;AF=1.00;AN=44;DP=213;ExcessHet=3.0103;FS=0.000;InbreedingCoeff=-0.0174;MLEAC=47;MLEAF=1.00;MQ=58.88;QD=26.65;SOR=1.501	GT:AD:DP:GQ:PL	./.	1/1:0,1:1:3:45,3,0	1/1:0,19:19:57:855,57,0	1/1:0,12:12:36:514,36,0	1/1:0,11:11:33:495,33,0	1/1:0,4:4:12:180,12,0	1/1:0,22:22:66:990,66,0	1/1:0,8:8:24:360,24,0	1/1:0,18:18:54:810,54,0	1/1:0,9:9:27:405,27,0	1/1:0,11:11:33:495,33,0	1/1:0,7:7:21:315,21,0	./.	1/1:0,2:2:6:90,6,0	1/1:0,8:8:24:360,24,0	1/1:0,4:4:12:180,12,0	1/1:0,13:13:39:585,39,0	1/1:0,4:4:12:180,12,0	1/1:0,11:11:33:495,33,0	1/1:0,6:6:18:270,18,0	1/1:0,12:12:36:540,36,0	1/1:0,9:9:27:405,27,0	1/1:0,14:14:42:630,42,0	1/1:0,8:8:24:334,24,0
chr9	10762548	.	G	C	200.54	.	AC=4;AF=0.667;AN=6;BaseQRankSum=-0.524;DP=7;ExcessHet=0.4576;FS=0.000;MLEAC=10;MLEAF=1.00;MQ=48.70;MQRankSum=1.282;QD=26.68;ReadPosRankSum=1.282;SOR=3.229	GT:AD:DP:GQ:PL	./.	./.	./.	./.	1/1:0,2:2:6:90,6,0	./.	./.	./.	./.	./.	./.	./.	1/1:0,2:2:6:90,6,0	0/0:1,0:1:3:0,3,25	./.	./.	./.	./.	./.	./.	./.	./.	./.	./.
chr9	10762552	.	G	T	206.32	.	AC=4;AF=1.00;AN=4;DP=4;ExcessHet=3.0103;FS=0.000;MLEAC=11;MLEAF=1.00;MQ=56.82;QD=28.40;SOR=3.258	GT:AD:DP:GQ:PL	./.	./.	./.	./.	1/1:0,2:2:6:90,6,0	./.	./.	./.	./.	./.	./.	./.	1/1:0,2:2:6:90,6,0	./.	./.	./.	./.	./.	./.	./.	./.	./.	./.	./.
chr9	11881517	.	G	A	336.61	.	AC=12;AF=1.00;AN=12;DP=10;ExcessHet=3.0103;FS=0.000;MLEAC=24;MLEAF=1.00;MQ=22.00;QD=30.22;SOR=4.804	GT:AD:DP:GQ:PL	./.	1/1:0,1:1:3:27,3,0	./.	./.	./.	./.	./.	./.	./.	1/1:0,1:1:3:27,3,0	./.	./.	./.	1/1:0,1:1:3:27,3,0	./.	1/1:0,3:3:9:80,9,0	./.	./.	./.	1/1:0,3:3:9:63,9,0	./.	1/1:0,1:1:3:27,3,0	./.	./.
chr9	12760499	.	A	T	77.34	.	AC=1;AF=0.125;AN=8;BaseQRankSum=0.549;DP=9;ExcessHet=3.0103;FS=0.000;MLEAC=4;MLEAF=0.500;MQ=36.42;MQRankSum=2.200;QD=25.78;ReadPosRankSum=0.000;SOR=0.132	GT:AD:DP:GQ:PL	./.	0/0:3,0:3:9:0,9,74	./.	./.	./.	./.	./.	./.	./.	./.	./.	0/0:1,0:1:3:0,3,25	./.	./.	./.	./.	./.	./.	./.	0/1:1,2:3:1:73,0,1	./.	./.	./.	0/0:2,0:2:6:0,6,65
chr9	12903803	.	G	A	3171.12	.	AC=24;AF=1.00;AN=24;DP=69;ExcessHet=3.0103;FS=0.000;InbreedingCoeff=0.0010;MLEAC=38;MLEAF=1.00;MQ=59.68;QD=30.99;SOR=1.785	GT:AD:DP:GQ:PL	1/1:0,10:10:30:450,30,0	1/1:0,5:5:15:204,15,0	./.	./.	./.	1/1:0,1:1:3:41,3,0	./.	./.	./.	./.	./.	1/1:0,1:1:3:41,3,0	1/1:0,23:23:69:1035,69,0	1/1:0,7:7:21:285,21,0	./.	./.	1/1:0,8:8:24:360,24,0	1/1:0,3:3:9:122,9,0	1/1:0,6:6:18:270,18,0	1/1:0,1:1:3:10,3,0	./.	./.	1/1:0,1:1:3:45,3,0	1/1:0,3:3:9:122,9,0
chr9	12903812	.	A	G	2264.96	.	AC=10;AF=1.00;AN=10;DP=48;ExcessHet=3.0103;FS=0.000;MLEAC=27;MLEAF=1.00;MQ=59.81;QD=28.75;SOR=7.784	GT:AD:DP:GQ:PL	1/1:0,10:10:30:450,30,0	./.	./.	./.	./.	./.	./.	./.	./.	./.	./.	./.	1/1:0,23:23:69:1035,69,0	./.	./.	./.	1/1:0,8:8:24:360,24,0	./.	1/1:0,6:6:18:270,18,0	./.	./.	./.	1/1:0,1:1:3:45,3,0	./.
chr9	16647144	.	C	T	282.16	.	AC=3;AF=0.250;AN=12;BaseQRankSum=0.713;DP=25;ExcessHet=4.3933;FS=0.000;MLEAC=9;MLEAF=0.750;MQ=40.45;MQRankSum=1.693;QD=28.22;ReadPosRankSum=0.000;SOR=0.163	GT:AD:DP:GQ:PL	./.	./.	./.	0/1:1,1:2:39:39,0,39	./.	0/0:1,0:1:3:0,3,45	./.	./.	./.	0/1:5,5:10:99:195,0,169	./.	./.	./.	./.	./.	0/0:3,0:3:9:0,9,135	./.	0/0:6,0:6:18:0,18,270	./.	0/1:2,1:3:36:36,0,81	./.	./.	./.	./.
chr9	16647146	.	A	G	779.61	.	AC=8;AF=0.500;AN=16;BaseQRankSum=-0.535;DP=25;ExcessHet=2.5225;FS=0.000;MLEAC=19;MLEAF=1.00;MQ=40.45;MQRankSum=-1.514;QD=30.76;ReadPosRankSum=0.000;SOR=1.893	GT:AD:DP:GQ:PL	./.	./.	./.	0/1:1,1:2:39:39,0,39	./.	0/1:0,1:1:4:39,0,4	./.	0/0:0,0:0:3:0,3,41	./.	0/1:5,5:10:99:169,0,195	./.	./.	./.	./.	./.	1/1:0,3:3:9:135,9,0	./.	1/1:0,6:6:18:270,18,0	./.	0/1:1,2:3:36:81,0,36	./.	0/0:0,0:0:3:0,3,10	./.	./.
chr9	16647150	.	C	T	1196.44	.	AC=11;AF=0.688;AN=16;BaseQRankSum=2.992;DP=28;ExcessHet=0.1703;FS=0.000;MLEAC=25;MLEAF=1.00;MQ=42.82;MQRankSum=-4.521;QD=25.64;ReadPosRankSum=0.000;SOR=3.767	GT:AD:DP:GQ:PL	./.	./.	./.	1/1:0,2:2:6:90,6,0	./.	0/1:1,1:2:4:39,0,4	./.	0/0:1,0:1:3:0,3,41	./.	1/1:0,10:10:30:450,30,0	./.	./.	./.	./.	./.	1/1:0,3:3:9:135,9,0	./.	1/1:0,6:6:18:270,18,0	./.	1/1:0,3:3:9:135,9,0	./.	0/0:1,0:1:3:0,3,10	./.	./.
chr9	17477805	.	G	A	4179.82	.	AC=16;AF=0.889;AN=18;BaseQRankSum=1.910;DP=116;ExcessHet=0.1296;FS=0.000;MLEAC=32;MLEAF=1.00;MQ=59.56;MQRankSum=-1.550;QD=30.54;ReadPosRankSum=-4.223;SOR=7.240	GT:AD:DP:GQ:PL	0/0:1,0:1:3:0,3,78	1/1:1,19:20:10:664,10,0	./.	./.	./.	./.	./.	1/1:0,12:12:36:427,36,0	./.	./.	1/1:0,1:1:3:41,3,0	1/1:0,23:23:69:870,69,0	./.	1/1:0,18:18:54:648,54,0	./.	1/1:0,9:9:27:340,27,0	./.	1/1:1,14:15:7:457,7,0	./.	./.	./.	./.	./.	1/1:0,16:16:48:601,48,0
chr9	17477812	.	T	C	6875.06	.	AC=16;AF=0.889;AN=18;BaseQRankSum=-0.557;DP=165;ExcessHet=0.1296;FS=0.000;MLEAC=33;MLEAF=1.00;MQ=59.40;MQRankSum=-1.751;QD=37.72;ReadPosRankSum=-6.324;SOR=8.801	GT:AD:DP:GQ:PL	0/0:1,0:1:3:0,3,41	1/1:1,29:30:48:1124,48,0	./.	./.	./.	./.	./.	1/1:0,18:18:54:781,54,0	./.	./.	1/1:0,1:1:3:45,3,0	1/1:0,29:29:87:1276,87,0	./.	1/1:0,27:27:79:1052,79,0	./.	1/1:0,15:15:44:587,44,0	./.	1/1:0,23:23:69:993,69,0	./.	./.	./.	./.	./.	1/1:0,21:21:63:878,63,0
chr12	2235169	.	T	A	1570.6	.	AC=20;AF=1.00;AN=20;DP=49;ExcessHet=3.0103;FS=0.000;InbreedingCoeff=-0.0698;MLEAC=35;MLEAF=1.00;MQ=23.96;QD=34.14;SOR=7.824	GT:AD:DP:GQ:PL	./.	1/1:0,7:7:21:201,21,0	./.	1/1:0,1:1:3:29,3,0	./.	1/1:0,6:6:18:173,18,0	./.	1/1:0,1:1:3:29,3,0	./.	1/1:0,3:3:9:84,9,0	./.	./.	./.	1/1:0,11:11:33:316,33,0	./.	1/1:0,5:5:15:144,15,0	./.	1/1:0,2:2:6:58,6,0	./.	./.	./.	1/1:0,12:12:36:345,36,0	./.	1/1:0,1:1:3:29,3,0
chr12	2460300	.	C	T	1261.57	.	AC=32;AF=1.00;AN=32;DP=30;ExcessHet=3.0103;FS=0.000;InbreedingCoeff=-0.1339;MLEAC=39;MLEAF=1.00;MQ=60.00;QD=30.61;SOR=0.826	GT:AD:DP:GQ:PL	1/1:0,2:2:6:78,6,0	1/1:0,3:3:9:118,9,0	1/1:0,2:2:6:46,6,0	1/1:0,2:2:6:82,6,0	./.	./.	1/1:0,1:1:3:41,3,0	1/1:0,1:1:3:41,3,0	1/1:0,4:4:11:93,11,0	1/1:0,4:4:12:159,12,0	1/1:0,1:1:3:41,3,0	1/1:0,1:1:3:41,3,0	./.	./.	1/1:0,1:1:3:41,3,0	1/1:0,2:2:6:82,6,0	./.	./.	./.	./.	1/1:0,1:1:3:37,3,0	1/1:0,1:1:3:37,3,0	1/1:0,2:2:6:46,6,0	1/1:0,2:2:6:82,6,0
chr12	2460328	.	A	C	1383.87	.	AC=32;AF=1.00;AN=32;DP=30;ExcessHet=3.0103;FS=0.000;InbreedingCoeff=-0.1334;MLEAC=39;MLEAF=1.00;MQ=60.00;QD=30.47;SOR=0.826	GT:AD:DP:GQ:PL	1/1:0,2:2:6:82,6,0	1/1:0,3:3:9:122,9,0	1/1:0,2:2:6:50,6,0	1/1:0,2:2:6:82,6,0	./.	./.	1/1:0,1:1:3:41,3,0	1/1:0,1:1:3:41,3,0	1/1:0,4:4:12:163,12,0	1/1:0,4:4:12:163,12,0	1/1:0,1:1:3:41,3,0	1/1:0,1:1:3:41,3,0	./.	./.	1/1:0,1:1:3:41,3,0	1/1:0,2:2:6:82,6,0	./.	./.	./.	./.	1/1:0,1:1:3:41,3,0	1/1:0,1:1:3:41,3,0	1/1:0,2:2:6:78,6,0	1/1:0,2:2:6:78,6,0
chr13	7814064	.	T	A	1385.63	.	AC=18;AF=1.00;AN=18;BaseQRankSum=-3.914;DP=47;ExcessHet=3.0103;FS=0.000;MLEAC=35;MLEAF=1.00;MQ=22.96;MQRankSum=6.930;QD=30.79;ReadPosRankSum=-6.635;SOR=6.316	GT:AD:DP:GQ:PL	./.	1/1:0,4:4:12:111,12,0	./.	./.	./.	1/1:0,4:4:12:111,12,0	./.	1/1:0,1:1:3:10,3,0	./.	1/1:0,4:4:12:111,12,0	./.	./.	./.	1/1:0,6:6:18:166,18,0	./.	1/1:0,5:5:15:139,15,0	./.	1/1:0,10:10:30:275,30,0	./.	1/1:1,11:12:10:280,10,0	./.	./.	./.	1/1:0,1:1:3:28,3,0
chr13	7814096	.	G	T	3165.01	.	AC=38;AF=1.00;AN=38;DP=95;ExcessHet=3.0103;FS=0.000;InbreedingCoeff=-0.0498;MLEAC=44;MLEAF=1.00;MQ=27.76;QD=34.03;SOR=0.714	GT:AD:DP:GQ:PL	1/1:0,6:6:18:215,18,0	1/1:0,4:4:11:75,11,0	1/1:0,2:2:6:70,6,0	./.	1/1:0,6:6:18:209,18,0	1/1:0,4:4:12:111,12,0	1/1:0,1:1:3:35,3,0	1/1:0,1:1:3:28,3,0	1/1:0,9:9:27:319,27,0	1/1:0,4:4:12:111,12,0	./.	./.	1/1:0,8:8:24:269,24,0	1/1:0,6:6:18:166,18,0	1/1:0,2:2:6:70,6,0	1/1:0,6:6:18:168,18,0	1/1:0,3:3:9:104,9,0	1/1:0,10:10:30:259,30,0	1/1:0,8:8:24:278,24,0	1/1:0,11:11:33:287,33,0	./.	./.	1/1:0,2:2:6:70,6,0	1/1:0,2:2:6:57,6,0
chr13	9530515	.	C	T	1235.61	.	AC=17;AF=0.708;AN=24;BaseQRankSum=1.899;DP=33;ExcessHet=2.6027;FS=0.000;InbreedingCoeff=-0.2221;MLEAC=27;MLEAF=1.00;MQ=54.28;MQRankSum=3.629;QD=28.80;ReadPosRankSum=0.000;SOR=2.833	GT:AD:DP:GQ:PL	./.	0/1:1,2:3:42:81,0,42	./.	1/1:0,1:1:3:45,3,0	./.	0/1:1,4:5:36:161,0,36	./.	1/1:0,3:3:9:135,9,0	./.	1/1:0,2:2:6:90,6,0	./.	0/1:1,2:3:32:81,0,32	./.	1/1:0,2:2:6:90,6,0	./.	1/1:0,5:5:15:221,15,0	./.	1/1:0,2:2:6:90,6,0	./.	0/0:1,0:1:3:0,3,51	./.	0/1:1,2:3:26:81,0,26	./.	0/1:1,2:3:42:81,0,42
chr13	9530521	.	G	T	352.84	.	AC=9;AF=0.375;AN=24;BaseQRankSum=-3.173;DP=33;ExcessHet=1.6919;FS=0.000;InbreedingCoeff=-0.1225;MLEAC=14;MLEAF=0.583;MQ=54.28;MQRankSum=1.898;QD=33.41;ReadPosRankSum=0.000;SOR=0.191	GT:AD:DP:GQ:PL	./.	0/1:2,1:3:36:36,0,87	./.	1/1:0,1:1:3:45,3,0	./.	0/1:4,1:5:30:30,0,141	./.	0/1:2,1:3:32:32,0,81	./.	0/1:1,1:2:39:39,0,39	./.	0/0:3,0:3:9:0,9,131	./.	0/0:2,0:2:6:0,6,90	./.	0/1:2,3:5:67:68,0,67	./.	1/1:0,2:2:6:90,6,0	./.	0/0:1,0:1:3:0,3,51	./.	0/0:3,0:3:9:0,9,125	./.	0/0:3,0:3:9:0,9,141
chr13	9530522	.	A	G	470.39	.	AC=8;AF=0.333;AN=24;BaseQRankSum=-0.892;DP=33;ExcessHet=10.6475;FS=0.000;InbreedingCoeff=-0.6067;MLEAC=15;MLEAF=0.625;MQ=54.28;MQRankSum=2.977;QD=29.40;ReadPosRankSum=0.000;SOR=0.299	GT:AD:DP:GQ:PL	./.	0/1:2,1:3:36:36,0,87	./.	0/0:1,0:1:3:0,3,45	./.	0/1:3,2:5:71:71,0,101	./.	0/1:2,1:3:36:36,0,77	./.	0/0:2,0:2:6:0,6,90	./.	0/1:2,1:3:36:36,0,77	./.	0/1:1,1:2:39:39,0,39	./.	0/1:3,2:5:67:67,0,120	./.	0/0:2,0:2:6:0,6,90	./.	0/0:1,0:1:3:0,3,51	./.	0/1:1,2:3:26:81,0,26	./.	0/1:1,2:3:42:81,0,42
chr13	9530524	.	A	C	153.33	.	AC=5;AF=0.208;AN=24;BaseQRankSum=-1.693;DP=33;ExcessHet=5.2558;FS=0.000;InbreedingCoeff=-0.3295;MLEAC=9;MLEAF=0.375;MQ=54.28;MQRankSum=-2.462;QD=10.22;ReadPosRankSum=0.000;SOR=0.042	GT:AD:DP:GQ:PL	./.	0/0:3,0:3:9:0,9,141	./.	0/0:1,0:1:3:0,3,45	./.	0/1:4,1:5:4:4,0,167	./.	0/1:2,1:3:36:36,0,81	./.	0/1:1,1:2:39:39,0,39	./.	0/1:2,1:3:36:36,0,77	./.	0/1:1,1:2:39:39,0,39	./.	0/0:5,0:5:15:0,15,169	./.	0/0:2,0:2:6:0,6,90	./.	0/0:1,0:1:3:0,3,51	./.	0/0:3,0:3:9:0,9,125	./.	0/0:3,0:3:9:0,9,141
chr13	10129923	.	CT	C	31.43	.	AC=2;AF=0.063;AN=32;BaseQRankSum=0.349;DP=96;ExcessHet=3.1527;FS=5.759;InbreedingCoeff=-0.1061;MLEAC=3;MLEAF=0.094;MQ=32.56;MQRankSum=2.751;QD=2.42;ReadPosRankSum=0.145;SOR=2.247	GT:AD:DP:GQ:PL	0/0:3,0:3:9:0,9,107	0/0:4,0:4:12:0,12,143	./.	./.	0/0:10,0:10:30:0,30,356	0/0:14,0:14:42:0,42,499	0/0:3,0:3:9:0,9,107	0/0:2,0:2:6:0,6,71	0/0:9,0:9:27:0,27,321	0/1:11,2:13:32:32,0,352	0/0:2,0:2:6:0,6,71	0/0:2,0:2:6:0,6,71	0/0:5,0:5:15:0,15,178	0/0:8,0:8:24:0,24,285	0/0:4,0:4:12:0,12,143	0/0:7,0:7:21:0,21,249	0/0:3,0:3:9:0,9,107	0/1:6,1:7:15:15,0,193	./.	./.	./.	./.	./.	./.
chr13	10129930	.	CT	C	148.08	.	AC=3;AF=0.136;AN=22;BaseQRankSum=0.671;DP=96;ExcessHet=3.6798;FS=0.000;InbreedingCoeff=-0.2570;MLEAC=6;MLEAF=0.273;MQ=32.56;MQRankSum=4.373;QD=7.05;ReadPosRankSum=-2.960;SOR=0.332	GT:AD:DP:GQ:PL	./.	0/0:4,0:4:12:0,12,150	./.	./.	./.	0/0:13,1:14:5:0,5,448	./.	0/1:1,1:2:31:31,0,31	0/0:1,0:1:3:0,3,28	0/1:10,3:13:71:71,0,335	./.	0/0:2,0:2:6:0,6,73	0/0:1,0:1:3:0,3,28	0/1:6,2:8:49:49,0,200	0/0:1,0:1:3:0,3,36	0/0:7,0:7:21:0,21,261	./.	0/0:7,0:7:21:0,21,260	./.	./.	./.	./.	./.	./.
chr13	10129932	.	TG	T	117.58	.	AC=4;AF=0.222;AN=18;BaseQRankSum=-3.749;DP=60;ExcessHet=4.8226;FS=0.000;MLEAC=9;MLEAF=0.500;MQ=36.75;MQRankSum=4.082;QD=16.80;ReadPosRankSum=-3.042;SOR=0.070	GT:AD:DP:GQ:PL	./.	0/0:4,0:4:12:0,12,162	./.	./.	./.	0/0:13,1:14:5:0,5,485	./.	0/0:2,0:2:6:0,6,77	./.	0/0:13,0:13:39:0,39,512	./.	0/1:1,1:2:31:31,0,34	./.	0/1:7,1:8:13:13,0,251	0/0:1,0:1:3:0,3,35	0/1:6,1:7:16:16,0,221	./.	0/1:5,2:7:52:52,0,181	./.	./.	./.	./.	./.	./.
chr13	14700757	.	T	C	196.97	.	AC=5;AF=0.109;AN=46;BaseQRankSum=-0.376;DP=167;ExcessHet=0.5115;FS=4.489;InbreedingCoeff=0.2527;MLEAC=4;MLEAF=0.087;MQ=26.55;MQRankSum=-6.976;QD=10.37;ReadPosRankSum=-0.271;SOR=1.205	GT:AD:DP:GQ:PL	0/0:12,0:12:36:0,36,394	0/0:9,0:9:27:0,27,264	./.	1/1:0,3:3:9:89,9,0	0/0:11,0:11:33:0,33,402	0/0:12,0:12:36:0,36,381	0/0:4,0:4:12:0,12,127	0/0:3,0:3:9:0,9,73	0/0:10,0:10:30:0,30,331	0/0:9,0:9:27:0,27,284	0/0:6,0:6:18:0,18,198	0/0:5,0:5:15:0,15,159	0/0:10,0:10:30:0,30,371	0/0:19,0:19:56:0,56,537	0/0:3,0:3:9:0,9,95	0/0:5,0:5:15:0,15,157	0/0:5,0:5:15:0,15,172	0/0:4,0:4:12:0,12,127	0/1:6,4:10:89:89,0,139	0/1:8,1:9:3:3,0,205	0/0:3,0:3:9:0,9,109	0/0:6,0:6:17:0,17,146	0/1:3,3:6:51:51,0,78	0/0:3,0:3:9:0,9,89
chr13	14700767	.	AG	A	51.25	.	AC=3;AF=0.065;AN=46;BaseQRankSum=-0.995;DP=167;ExcessHet=3.3099;FS=12.958;InbreedingCoeff=-0.0835;MLEAC=2;MLEAF=0.043;MQ=26.55;MQRankSum=-5.123;QD=4.66;ReadPosRankSum=0.630;SOR=3.249	GT:AD:DP:GQ:PL	0/0:12,0:12:36:0,36,448	0/0:9,0:9:27:0,27,336	./.	0/0:3,0:3:9:0,9,135	0/1:9,2:11:42:42,0,304	0/0:12,0:12:36:0,36,449	0/0:4,0:4:12:0,12,150	0/0:3,0:3:9:0,9,112	0/1:9,1:10:7:7,0,307	0/0:9,0:9:27:0,27,337	0/0:6,0:6:18:0,18,224	0/0:5,0:5:15:0,15,187	0/0:10,0:10:30:0,30,374	0/0:19,0:19:57:0,57,711	0/0:3,0:3:9:0,9,112	0/0:5,0:5:15:0,15,187	0/0:5,0:5:15:0,15,187	0/0:4,0:4:12:0,12,147	0/0:10,0:10:30:0,30,404	0/0:9,0:9:27:0,27,344	0/1:2,1:3:28:28,0,64	0/0:6,0:6:18:0,18,222	0/0:6,0:6:18:0,18,247	0/0:3,0:3:9:0,9,100
chr13	14700770	.	AT	A	78.01	.	AC=2;AF=0.043;AN=46;BaseQRankSum=0.988;DP=166;ExcessHet=3.1079;FS=12.641;InbreedingCoeff=-0.0606;MLEAC=1;MLEAF=0.022;MQ=26.58;MQRankSum=-5.256;QD=7.80;ReadPosRankSum=0.629;SOR=3.250	GT:AD:DP:GQ:PL	0/1:11,1:12:4:4,0,408	0/0:9,0:9:27:0,27,364	./.	0/0:3,0:3:9:0,9,135	0/0:11,0:11:33:0,33,443	0/0:12,0:12:36:0,36,483	0/0:4,0:4:12:0,12,162	0/0:3,0:3:9:0,9,121	0/0:10,0:10:30:0,30,404	0/0:9,0:9:27:0,27,360	0/0:6,0:6:18:0,18,241	0/0:5,0:5:15:0,15,202	0/1:7,3:10:91:91,0,253	0/0:19,0:19:57:0,57,766	0/0:3,0:3:9:0,9,121	0/0:5,0:5:15:0,15,202	0/0:5,0:5:15:0,15,202	0/0:4,0:4:12:0,12,162	0/0:10,0:10:30:0,30,421	0/0:9,0:9:27:0,27,368	0/0:3,0:3:9:0,9,121	0/0:6,0:6:18:0,18,241	0/0:6,0:6:18:0,18,256	0/0:2,0:2:6:0,6,81
chr13	14700773	.	CT	C	56.54	.	AC=4;AF=0.087;AN=46;BaseQRankSum=0.883;DP=166;ExcessHet=3.6240;FS=15.473;InbreedingCoeff=-0.1126;MLEAC=3;MLEAF=0.065;MQ=26.58;MQRankSum=-5.321;QD=5.14;ReadPosRankSum=0.599;SOR=3.606	GT:AD:DP:GQ:PL	0/0:12,0:12:36:0,36,428	0/0:7,0:7:21:0,21,228	./.	0/0:3,0:3:9:0,9,135	0/1:9,2:11:38:38,0,288	0/0:11,0:11:33:0,33,364	0/0:4,0:4:12:0,12,143	0/0:3,0:3:9:0,9,102	0/0:10,0:10:30:0,30,356	0/0:8,0:8:24:0,24,258	0/1:5,1:6:18:18,0,160	0/0:5,0:5:15:0,15,167	0/1:9,1:10:6:6,0,291	0/0:19,0:19:57:0,57,622	0/0:3,0:3:9:0,9,107	0/0:5,0:5:15:0,15,162	0/1:3,1:4:24:24,0,95	0/0:4,0:4:12:0,12,131	0/0:10,0:10:30:0,30,393	0/0:9,0:9:27:0,27,311	0/0:3,0:3:9:0,9,107	0/0:6,0:6:18:0,18,192	0/0:6,0:6:18:0,18,241	0/0:2,0:2:6:0,6,71
chr13	16164885	.	CT	C	45.47	.	AC=1;AF=0.042;AN=24;BaseQRankSum=-1.097;DP=117;ExcessHet=3.0103;FS=0.000;InbreedingCoeff=-0.0626;MLEAC=2;MLEAF=0.083;MQ=60.00;MQRankSum=0.000;QD=6.50;ReadPosRankSum=-1.449;SOR=0.002	GT:AD:DP:GQ:PL	0/0:6,0:6:18:0,18,224	./.	0/0:18,1:19:20:0,20,635	./.	0/0:16,0:16:48:0,48,599	./.	0/0:7,0:7:21:0,21,262	./.	0/0:8,0:8:24:0,24,299	./.	0/0:3,0:3:9:0,9,111	./.	0/0:13,1:14:5:0,5,449	./.	0/1:5,2:7:54:54,0,166	./.	0/0:10,0:10:30:0,30,374	./.	0/0:14,0:14:42:0,42,524	./.	0/0:6,0:6:18:0,18,224	./.	0/0:7,0:7:21:0,21,262	./.
chr13	16164895	.	TG	T	137.62	.	AC=4;AF=0.167;AN=24;BaseQRankSum=1.093;DP=112;ExcessHet=4.2867;FS=0.000;InbreedingCoeff=-0.2193;MLEAC=6;MLEAF=0.250;MQ=60.00;MQRankSum=0.000;QD=6.26;ReadPosRankSum=-2.548;SOR=0.009	GT:AD:DP:GQ:PL	0/0:6,0:6:18:0,18,224	./.	0/0:18,1:19:20:0,20,629	./.	0/1:12,3:15:67:67,0,404	./.	0/0:6,0:6:18:0,18,224	./.	0/1:5,2:7:54:54,0,165	./.	0/0:3,0:3:9:0,9,112	./.	0/0:13,1:14:5:0,5,449	./.	0/0:7,0:7:21:0,21,262	./.	0/1:8,1:9:10:10,0,271	./.	0/0:13,0:13:39:0,39,484	./.	0/0:5,0:5:15:0,15,184	./.	0/1:6,1:7:16:16,0,201	./.
chr13	16164898	.	TG	T	186.59	.	AC=4;AF=0.167;AN=24;BaseQRankSum=2.020;DP=106;ExcessHet=4.2867;FS=0.000;InbreedingCoeff=-0.2003;MLEAC=6;MLEAF=0.250;MQ=60.00;MQRankSum=0.000;QD=5.33;ReadPosRankSum=-4.002;SOR=0.014	GT:AD:DP:GQ:PL	0/0:6,0:6:18:0,18,224	./.	0/1:12,3:15:67:67,0,402	./.	0/0:14,1:15:8:0,8,483	./.	0/1:4,2:6:57:57,0,132	./.	0/0:7,0:7:21:0,21,260	./.	0/0:2,0:2:6:0,6,75	./.	0/1:11,3:14:70:70,0,366	./.	0/0:7,0:7:21:0,21,259	./.	0/0:8,0:8:24:0,24,298	./.	0/1:11,1:12:1:1,0,369	./.	0/0:4,0:4:12:0,12,150	./.	0/0:6,0:6:18:0,18,224	./.
chr13	18083626	.	C	T	5539.93	.	AC=39;AF=0.813;AN=48;BaseQRankSum=-0.803;DP=151;ExcessHet=6.9988;FS=1.375;InbreedingCoeff=-0.2310;MLEAC=39;MLEAF=0.813;MQ=59.95;MQRankSum=-0.747;QD=26.49;ReadPosRankSum=1.018;SOR=0.331	GT:AD:DP:GQ:PL	0/1:1,3:4:29:110,0,29	0/1:1,11:12:5:408,0,5	1/1:0,4:4:12:163,12,0	1/1:0,6:6:18:245,18,0	0/1:1,7:8:17:261,0,17	0/1:1,8:9:14:299,0,14	1/1:0,4:4:12:148,12,0	1/1:0,6:6:18:245,18,0	1/1:0,4:4:12:163,12,0	0/1:1,12:13:2:442,0,2	1/1:0,2:2:6:82,6,0	0/1:1,9:10:11:333,0,11	1/1:0,6:6:18:245,18,0	1/1:0,8:8:24:326,24,0	1/1:0,2:2:6:82,6,0	0/1:1,5:6:23:186,0,23	1/1:0,3:3:9:122,9,0	1/1:0,4:4:12:163,12,0	1/1:0,3:3:9:122,9,0	0/1:3,8:11:89:289,0,89	1/1:0,2:2:6:82,6,0	1/1:0,6:6:18:213,18,0	1/1:0,5:5:15:204,15,0	0/1:1,12:13:2:446,0,2
chr13	18083643	.	TC	T	58.6	.	AC=3;AF=0.063;AN=48;BaseQRankSum=-4.954;DP=151;ExcessHet=3.2968;FS=2.385;InbreedingCoeff=-0.0952;MLEAC=3;MLEAF=0.063;MQ=59.95;MQRankSum=0.461;QD=5.86;ReadPosRankSum=-4.890;SOR=1.894	GT:AD:DP:GQ:PL	0/0:4,0:4:12:0,12,162	0/0:12,0:12:36:0,36,485	0/0:4,0:4:12:0,12,150	0/0:6,0:6:18:0,18,241	0/0:8,0:8:24:0,24,323	0/1:8,1:9:13:13,0,288	0/0:4,0:4:12:0,12,162	0/0:6,0:6:18:0,18,239	0/0:4,0:4:12:0,12,162	0/0:13,0:13:39:0,39,523	0/0:2,0:2:6:0,6,81	0/1:8,2:10:51:51,0,290	0/0:6,0:6:18:0,18,243	0/0:8,0:8:24:0,24,323	0/0:2,0:2:6:0,6,81	0/0:6,0:6:18:0,18,239	0/0:3,0:3:9:0,9,121	0/0:4,0:4:12:0,12,162	0/0:3,0:3:9:0,9,117	0/0:11,0:11:33:0,33,445	0/0:2,0:2:6:0,6,81	0/1:5,1:6:22:22,0,184	0/0:5,0:5:15:0,15,202	0/0:13,0:13:39:0,39,526
chr13	18634547	.	A	C	340.94	.	AC=14;AF=0.636;AN=22;BaseQRankSum=-0.431;DP=12;ExcessHet=0.0022;FS=0.000;InbreedingCoeff=0.3378;MLEAC=19;MLEAF=0.864;MQ=59.84;MQRankSum=0.967;QD=31.40;ReadPosRankSum=1.471;SOR=1.739	GT:AD:DP:GQ:PL	./.	1/1:0,1:1:3:41,3,0	./.	./.	./.	./.	./.	./.	0/0:1,0:1:3:0,3,45	./.	1/1:0,1:1:3:41,3,0	./.	0/0:1,0:1:3:0,3,45	1/1:0,1:1:3:41,3,0	./.	./.	1/1:0,1:1:3:41,3,0	0/0:1,0:1:3:0,3,45	./.	1/1:0,1:1:3:10,3,0	0/0:1,0:1:3:0,3,45	1/1:0,1:1:3:41,3,0	./.	1/1:0,2:2:6:82,6,0
chr13	18634549	.	T	C	36.01	.	AC=2;AF=0.091;AN=22;BaseQRankSum=0.603;DP=12;ExcessHet=0.1047;FS=0.000;InbreedingCoeff=0.0669;MLEAC=3;MLEAF=0.136;MQ=59.84;MQRankSum=0.603;QD=26.79;ReadPosRankSum=1.128;SOR=1.371	GT:AD:DP:GQ:PL	./.	0/0:1,0:1:3:0,3,45	./.	./.	./.	./.	./.	./.	0/0:1,0:1:3:0,3,45	./.	0/0:1,0:1:3:0,3,45	./.	0/0:1,0:1:3:0,3,45	0/0:1,0:1:3:0,3,45	./.	./.	0/0:1,0:1:3:0,3,45	1/1:0,1:1:3:41,3,0	./.	0/0:1,0:1:3:0,3,45	0/0:1,0:1:3:0,3,45	0/0:1,0:1:3:0,3,45	./.	0/0:2,0:2:6:0,6,90
chr13	18634550	.	G	C	42.95	.	AC=4;AF=0.182;AN=22;BaseQRankSum=-1.321;DP=12;ExcessHet=0.0164;FS=0.000;InbreedingCoeff=0.2019;MLEAC=4;MLEAF=0.182;MQ=59.84;MQRankSum=-2.012;QD=21.48;ReadPosRankSum=-1.554;SOR=2.225	GT:AD:DP:GQ:PL	./.	0/0:1,0:1:3:0,3,45	./.	./.	./.	./.	./.	./.	0/0:1,0:1:3:0,3,45	./.	0/0:1,0:1:3:0,3,45	./.	1/1:0,1:1:3:41,3,0	0/0:1,0:1:3:0,3,45	./.	./.	0/0:1,0:1:3:0,3,45	0/0:1,0:1:3:0,3,45	./.	0/0:1,0:1:3:0,3,45	1/1:0,1:1:3:10,3,0	0/0:1,0:1:3:0,3,45	./.	0/0:2,0:2:6:0,6,90
chr13	20463324	.	G	T	117.23	.	AC=6;AF=0.130;AN=46;BaseQRankSum=-1.700;DP=106;ExcessHet=4.6235;FS=9.745;InbreedingCoeff=-0.2152;MLEAC=6;MLEAF=0.130;MQ=60.00;MQRankSum=0.000;QD=9.02;ReadPosRankSum=-3.464;SOR=3.258	GT:AD:DP:GQ:PL	0/0:5,0:5:15:0,15,170	0/0:2,0:2:6:0,6,71	0/0:1,0:1:3:0,3,34	./.	0/1:6,1:7:13:13,0,183	0/0:5,0:5:15:0,15,152	0/1:3,1:4:22:22,0,90	0/0:1,0:1:3:0,3,36	0/1:8,1:9:7:7,0,221	0/0:4,0:4:12:0,12,143	0/0:3,0:3:9:0,9,102	0/0:3,0:3:9:0,9,106	0/0:15,1:16:14:0,14,476	0/0:3,0:3:9:0,9,81	0/0:2,0:2:6:0,6,68	0/0:1,0:1:3:0,3,36	0/1:8,1:9:7:7,0,245	0/0:6,0:6:18:0,18,214	0/0:5,0:5:15:0,15,170	0/0:4,0:4:12:0,12,143	0/1:5,2:7:47:47,0,149	0/0:2,0:2:6:0,6,71	0/1:4,2:6:50:50,0,118	0/0:1,0:1:3:0,3,36
chr13	20467252	.	T	TG	36.3	.	AC=1;AF=0.026;AN=38;BaseQRankSum=0.341;DP=74;ExcessHet=3.0103;FS=0.000;InbreedingCoeff=-0.1121;MLEAC=1;MLEAF=0.026;MQ=60.00;MQRankSum=0.000;QD=4.54;ReadPosRankSum=-3.204;SOR=1.292	GT:AD:DP:GQ:PL	0/0:3,0:3:9:0,9,107	0/1:6,2:8:47:47,0,190	./.	./.	./.	0/0:1,0:1:3:0,3,36	0/0:1,0:1:3:0,3,36	0/0:4,0:4:12:0,12,143	0/0:7,0:7:21:0,21,250	0/0:7,0:7:21:0,21,250	0/0:3,0:3:9:0,9,107	0/0:1,0:1:3:0,3,36	0/0:5,0:5:15:0,15,179	0/0:7,0:7:21:0,21,250	0/0:1,0:1:3:0,3,36	0/0:5,0:5:15:0,15,179	0/0:3,0:3:9:0,9,107	0/0:5,0:5:15:0,15,179	0/0:1,0:1:3:0,3,36	0/0:1,0:1:3:0,3,36	0/0:1,0:1:3:0,3,36	0/0:10,0:10:30:0,30,357	./.	./.
chr13	20467276	.	C	CA	60.51	.	AC=2;AF=0.053;AN=38;BaseQRankSum=0.508;DP=74;ExcessHet=3.1293;FS=2.631;InbreedingCoeff=-0.1429;MLEAC=3;MLEAF=0.079;MQ=60.00;MQRankSum=0.000;QD=12.10;ReadPosRankSum=-0.496;SOR=1.810	GT:AD:DP:GQ:PL	0/0:3,0:3:9:0,9,96	0/0:8,0:8:24:0,24,254	./.	./.	./.	0/0:1,0:1:3:0,3,32	0/0:1,0:1:3:0,3,32	0/0:4,0:4:11:0,11,105	0/0:7,0:7:21:0,21,223	0/0:7,0:7:21:0,21,222	0/0:3,0:3:9:0,9,96	0/0:1,0:1:3:0,3,32	0/0:5,0:5:15:0,15,159	0/0:7,0:7:21:0,21,222	0/0:1,0:1:3:0,3,32	0/1:3,2:5:49:49,0,81	0/0:3,0:3:9:0,9,95	0/1:4,1:5:17:17,0,112	0/0:1,0:1:3:0,3,32	0/0:1,0:1:3:0,3,32	0/0:1,0:1:3:0,3,32	0/0:10,0:10:30:0,30,318	./.	./.
chr13	21028969	.	C	T	371.71	.	AC=14;AF=1.00;AN=14;DP=10;ExcessHet=3.0103;FS=0.000;MLEAC=26;MLEAF=1.00;MQ=23.00;QD=28.44;SOR=4.804	GT:AD:DP:GQ:PL	./.	./.	./.	./.	./.	./.	1/1:0,1:1:3:28,3,0	./.	1/1:0,1:1:3:28,3,0	./.	1/1:0,1:1:3:28,3,0	./.	1/1:0,1:1:3:28,3,0	./.	./.	./.	1/1:0,2:2:6:55,6,0	./.	./.	./.	1/1:0,3:3:9:83,9,0	./.	1/1:0,1:1:3:28,3,0	./.
chr13	21153736	.	C	T	5713.6	.	AC=36;AF=1.00;AN=36;DP=148;ExcessHet=3.0103;FS=0.000;InbreedingCoeff=-0.0336;MLEAC=44;MLEAF=1.00;MQ=51.23;QD=29.72;SOR=1.179	GT:AD:DP:GQ:PL	1/1:0,14:14:42:567,42,0	1/1:0,24:24:72:837,72,0	./.	./.	./.	./.	1/1:0,1:1:3:37,3,0	1/1:0,5:5:15:139,15,0	1/1:0,6:6:18:245,18,0	1/1:0,10:10:30:355,30,0	1/1:0,5:5:15:204,15,0	1/1:0,7:7:21:242,21,0	1/1:0,14:14:42:567,42,0	1/1:0,16:16:48:517,48,0	1/1:0,3:3:9:122,9,0	1/1:0,6:6:18:206,18,0	1/1:0,9:9:27:367,27,0	1/1:0,12:12:36:445,36,0	1/1:0,1:1:3:41,3,0	./.	1/1:0,6:6:18:245,18,0	1/1:0,8:8:24:287,24,0	./.	1/1:0,1:1:3:28,3,0
chr13	21153739	.	GT	G	33.49	.	AC=1;AF=0.028;AN=36;BaseQRankSum=0.360;DP=148;ExcessHet=3.0103;FS=2.844;InbreedingCoeff=-0.0661;MLEAC=1;MLEAF=0.028;MQ=51.23;MQRankSum=0.977;QD=2.79;ReadPosRankSum=0.234;SOR=1.646	GT:AD:DP:GQ:PL	0/0:14,0:14:42:0,42,566	0/0:24,0:24:72:0,72,980	./.	./.	./.	./.	0/0:1,0:1:3:0,3,40	0/0:5,0:5:15:0,15,202	0/0:6,0:6:18:0,18,243	0/0:10,0:10:30:0,30,414	0/0:5,0:5:15:0,15,202	0/0:7,0:7:21:0,21,292	0/0:14,0:14:42:0,42,566	0/0:16,0:16:48:0,48,656	0/0:3,0:3:9:0,9,121	0/0:6,0:6:18:0,18,247	0/0:9,0:9:27:0,27,364	0/1:10,2:12:45:45,0,374	0/0:1,0:1:3:0,3,40	./.	0/0:6,0:6:18:0,18,243	0/0:8,0:8:24:0,24,337	./.	0/0:1,0:1:3:0,3,40
chr13	21153740	.	TG	T	129.49	.	AC=4;AF=0.111;AN=36;BaseQRankSum=0.562;DP=148;ExcessHet=3.8134;FS=22.145;InbreedingCoeff=-0.1796;MLEAC=5;MLEAF=0.139;MQ=51.23;MQRankSum=2.251;QD=2.59;ReadPosRankSum=0.530;SOR=4.285	GT:AD:DP:GQ:PL	0/0:14,0:14:42:0,42,523	0/1:21,3:24:40:40,0,762	./.	./.	./.	./.	0/0:1,0:1:3:0,3,37	0/0:5,0:5:15:0,15,187	0/0:6,0:6:18:0,18,225	0/0:9,1:10:4:0,4,317	0/0:5,0:5:15:0,15,187	0/1:6,1:7:16:16,0,214	0/0:14,0:14:42:0,42,524	0/1:14,2:16:27:27,0,492	0/0:3,0:3:9:0,9,112	0/0:6,0:6:18:0,18,240	0/0:9,0:9:27:0,27,336	0/1:7,3:10:82:82,0,240	0/0:1,0:1:3:0,3,37	./.	0/0:6,0:6:18:0,18,225	0/0:8,0:8:24:0,24,337	./.	0/0:1,0:1:3:0,3,37
chr13	21153742	.	GT	G	45.96	.	AC=3;AF=0.083;AN=36;BaseQRankSum=0.568;DP=148;ExcessHet=3.3995;FS=10.892;InbreedingCoeff=-0.1228;MLEAC=3;MLEAF=0.083;MQ=51.23;MQRankSum=1.704;QD=1.35;ReadPosRankSum=0.407;SOR=3.258	GT:AD:DP:GQ:PL	0/0:14,0:14:42:0,42,523	0/1:22,2:24:3:3,0,803	./.	./.	./.	./.	0/0:1,0:1:3:0,3,37	0/0:5,0:5:15:0,15,186	0/0:6,0:6:18:0,18,225	0/1:8,2:10:45:45,0,257	0/0:5,0:5:15:0,15,187	0/1:6,1:7:16:16,0,214	0/0:14,0:14:42:0,42,524	0/0:15,1:16:11:0,11,543	0/0:3,0:3:9:0,9,112	0/0:6,0:6:18:0,18,240	0/0:9,0:9:27:0,27,337	0/0:12,0:12:36:0,36,482	0/0:1,0:1:3:0,3,37	./.	0/0:6,0:6:18:0,18,225	0/0:8,0:8:24:0,24,336	./.	0/0:1,0:1:3:0,3,37
chr13	21153746	.	AT	A	55.96	.	AC=2;AF=0.056;AN=36;BaseQRankSum=0.316;DP=148;ExcessHet=3.3775;FS=10.892;InbreedingCoeff=-0.1162;MLEAC=3;MLEAF=0.083;MQ=51.23;MQRankSum=1.704;QD=7.00;ReadPosRankSum=0.401;SOR=3.258	GT:AD:DP:GQ:PL	0/0:14,0:14:42:0,42,487	0/0:24,0:24:72:0,72,948	./.	./.	./.	./.	0/0:1,0:1:3:0,3,37	0/0:5,0:5:15:0,15,187	0/0:6,0:6:18:0,18,215	0/0:10,0:10:30:0,30,397	0/0:5,0:5:15:0,15,179	0/1:6,1:7:15:15,0,218	0/0:14,0:14:42:0,42,501	0/0:15,1:16:12:0,12,551	0/0:3,0:3:9:0,9,107	0/0:6,0:6:18:0,18,226	0/0:9,0:9:27:0,27,323	0/0:11,1:12:0:0,0,414	0/0:1,0:1:3:0,3,36	./.	0/0:6,0:6:18:0,18,214	0/1:5,3:8:57:57,0,170	./.	0/0:1,0:1:3:0,3,37
chr13	21153748	.	TA	T	203.39	.	AC=3;AF=0.125;AN=24;BaseQRankSum=-3.098;DP=148;ExcessHet=3.6173;FS=0.000;InbreedingCoeff=-0.2256;MLEAC=6;MLEAF=0.250;MQ=51.23;MQRankSum=3.433;QD=6.36;ReadPosRankSum=-3.173;SOR=0.270	GT:AD:DP:GQ:PL	./.	0/1:18,6:24:99:142,0,615	./.	./.	./.	./.	./.	0/0:5,0:5:15:0,15,178	0/0:1,0:1:3:0,3,34	0/0:10,0:10:30:0,30,384	./.	0/0:7,0:7:21:0,21,273	0/0:1,0:1:3:0,3,33	0/0:15,1:16:12:0,12,531	./.	0/1:4,1:5:20:20,0,129	0/0:1,0:1:3:0,3,35	0/0:12,0:12:36:0,36,461	./.	./.	./.	0/1:6,2:8:48:48,0,174	./.	0/0:1,0:1:3:0,3,36
chr13	21285455	.	C	T	349.11	.	AC=8;AF=0.400;AN=20;BaseQRankSum=2.045;DP=22;ExcessHet=0.1849;FS=17.404;InbreedingCoeff=0.1956;MLEAC=14;MLEAF=0.700;MQ=41.67;MQRankSum=-4.311;QD=31.74;ReadPosRankSum=-3.430;SOR=5.131	GT:AD:DP:GQ:PL	0/1:1,5:6:23:130,0,23	0/0:1,0:1:3:0,3,32	./.	./.	./.	./.	1/1:0,2:2:6:60,6,0	./.	1/1:0,3:3:9:89,9,0	./.	./.	0/0:3,0:3:9:0,9,113	./.	0/0:1,0:1:3:0,3,45	./.	0/0:2,0:2:6:0,6,90	1/1:0,1:1:3:30,3,0	./.	./.	./.	0/1:1,1:2:24:24,0,35	./.	0/0:1,0:1:3:0,3,41	./.
chr13	21285457	.	G	C	142.65	.	AC=5;AF=0.250;AN=20;BaseQRankSum=-4.493;DP=22;ExcessHet=0.1020;FS=13.424;InbreedingCoeff=0.2699;MLEAC=8;MLEAF=0.400;MQ=41.67;MQRankSum=3.056;QD=28.53;ReadPosRankSum=2.923;SOR=3.584	GT:AD:DP:GQ:PL	0/0:6,0:6:18:0,18,307	0/0:1,0:1:3:0,3,64	./.	./.	./.	./.	0/0:2,0:2:6:0,6,90	./.	0/0:3,0:3:9:0,9,135	./.	./.	0/1:1,2:3:55:55,0,71	./.	1/1:0,1:1:3:45,3,0	./.	1/1:0,2:2:6:45,6,0	0/0:1,0:1:3:0,3,45	./.	./.	./.	0/0:2,0:2:6:0,6,127	./.	0/0:1,0:1:3:0,3,82	./.
chr13	21285471	.	T	C	142.65	.	AC=5;AF=0.250;AN=20;BaseQRankSum=-4.379;DP=21;ExcessHet=0.1020;FS=13.424;InbreedingCoeff=0.2699;MLEAC=8;MLEAF=0.400;MQ=40.59;MQRankSum=2.817;QD=25.65;ReadPosRankSum=-3.450;SOR=3.220	GT:AD:DP:GQ:PL	0/0:6,0:6:18:0,18,307	0/0:1,0:1:3:0,3,64	./.	./.	./.	./.	0/0:2,0:2:6:0,6,90	./.	0/0:3,0:3:9:0,9,135	./.	./.	0/1:1,2:3:55:55,0,71	./.	1/1:0,1:1:3:45,3,0	./.	1/1:0,1:1:6:45,6,0	0/0:1,0:1:3:0,3,45	./.	./.	./.	0/0:2,0:2:6:0,6,127	./.	0/0:1,0:1:3:0,3,82	./.
chr13	28926635	.	C	T	5086.7	.	AC=46;AF=1.00;AN=46;DP=107;ExcessHet=3.0103;FS=0.000;InbreedingCoeff=-0.0631;MLEAC=46;MLEAF=1.00;MQ=50.00;QD=32.18;SOR=0.789	GT:AD:DP:GQ:PL	1/1:0,5:5:15:225,15,0	1/1:0,3:3:9:135,9,0	1/1:0,1:1:3:45,3,0	1/1:0,1:1:3:29,3,0	1/1:0,7:7:21:315,21,0	1/1:0,7:7:21:315,21,0	1/1:0,2:2:6:90,6,0	1/1:0,1:1:3:45,3,0	1/1:0,1:1:3:45,3,0	1/1:0,2:2:6:90,6,0	1/1:0,4:4:12:180,12,0	1/1:0,1:1:3:45,3,0	1/1:0,12:12:36:540,36,0	1/1:0,8:8:24:360,24,0	1/1:0,5:5:15:225,15,0	1/1:0,7:7:21:315,21,0	1/1:0,6:6:18:270,18,0	1/1:0,5:5:15:225,15,0	1/1:0,5:5:15:225,15,0	1/1:0,8:8:24:360,24,0	1/1:0,8:8:24:360,24,0	1/1:0,7:7:21:315,21,0	./.	1/1:0,1:1:3:45,3,0
chr13	28926637	.	C	T	5086.7	.	AC=46;AF=1.00;AN=46;DP=107;ExcessHet=3.0103;FS=0.000;InbreedingCoeff=-0.0631;MLEAC=46;MLEAF=1.00;MQ=50.00;QD=32.73;SOR=0.789	GT:AD:DP:GQ:PL	1/1:0,5:5:15:225,15,0	1/1:0,3:3:9:135,9,0	1/1:0,1:1:3:45,3,0	1/1:0,1:1:3:29,3,0	1/1:0,7:7:21:315,21,0	1/1:0,7:7:21:315,21,0	1/1:0,2:2:6:90,6,0	1/1:0,1:1:3:45,3,0	1/1:0,1:1:3:45,3,0	1/1:0,2:2:6:90,6,0	1/1:0,4:4:12:180,12,0	1/1:0,1:1:3:45,3,0	1/1:0,12:12:36:540,36,0	1/1:0,8:8:24:360,24,0	1/1:0,5:5:15:225,15,0	1/1:0,7:7:21:315,21,0	1/1:0,6:6:18:270,18,0	1/1:0,5:5:15:225,15,0	1/1:0,5:5:15:225,15,0	1/1:0,8:8:24:360,24,0	1/1:0,8:8:24:360,24,0	1/1:0,7:7:21:315,21,0	./.	1/1:0,1:1:3:45,3,0
chr13	28926639	.	G	A	5086.7	.	AC=46;AF=1.00;AN=46;DP=107;ExcessHet=3.0103;FS=0.000;InbreedingCoeff=-0.0631;MLEAC=46;MLEAF=1.00;MQ=50.00;QD=27.45;SOR=0.789	GT:AD:DP:GQ:PL	1/1:0,5:5:15:225,15,0	1/1:0,3:3:9:135,9,0	1/1:0,1:1:3:45,3,0	1/1:0,1:1:3:29,3,0	1/1:0,7:7:21:315,21,0	1/1:0,7:7:21:315,21,0	1/1:0,2:2:6:90,6,0	1/1:0,1:1:3:45,3,0	1/1:0,1:1:3:45,3,0	1/1:0,2:2:6:90,6,0	1/1:0,4:4:12:180,12,0	1/1:0,1:1:3:45,3,0	1/1:0,12:12:36:540,36,0	1/1:0,8:8:24:360,24,0	1/1:0,5:5:15:225,15,0	1/1:0,7:7:21:315,21,0	1/1:0,6:6:18:270,18,0	1/1:0,5:5:15:225,15,0	1/1:0,5:5:15:225,15,0	1/1:0,8:8:24:360,24,0	1/1:0,8:8:24:360,24,0	1/1:0,7:7:21:315,21,0	./.	1/1:0,1:1:3:45,3,0
chr14	6881060	.	A	G	4203.16	.	AC=44;AF=1.00;AN=44;DP=94;ExcessHet=3.0103;FS=0.000;InbreedingCoeff=-0.0344;MLEAC=45;MLEAF=1.00;MQ=49.58;QD=32.85;SOR=0.736	GT:AD:DP:GQ:PL	1/1:0,7:7:21:285,21,0	1/1:0,5:5:15:225,15,0	1/1:0,5:5:15:203,15,0	1/1:0,7:7:21:289,21,0	1/1:0,12:12:36:457,36,0	1/1:0,9:9:27:405,27,0	1/1:0,1:1:3:41,3,0	1/1:0,1:1:3:45,3,0	1/1:0,8:8:24:326,24,0	1/1:0,9:9:27:405,27,0	1/1:0,2:2:6:77,6,0	1/1:0,2:2:6:90,6,0	1/1:0,1:1:3:10,3,0	1/1:0,1:1:3:45,3,0	1/1:0,1:1:3:41,3,0	1/1:0,1:1:3:45,3,0	1/1:0,3:3:9:122,9,0	1/1:0,3:3:9:135,9,0	1/1:0,6:6:18:241,18,0	1/1:0,4:4:12:180,12,0	1/1:0,2:2:6:81,6,0	1/1:0,4:4:12:180,12,0	./.	./.
chr14	6881070	.	T	C	2219.22	.	AC=22;AF=1.00;AN=22;DP=46;ExcessHet=3.0103;FS=0.000;InbreedingCoeff=-0.0718;MLEAC=37;MLEAF=1.00;MQ=60.00;QD=33.15;SOR=7.701	GT:AD:DP:GQ:PL	./.	1/1:0,5:5:15:225,15,0	./.	1/1:0,7:7:21:289,21,0	./.	1/1:0,9:9:27:405,27,0	./.	1/1:0,1:1:3:45,3,0	./.	1/1:0,9:9:27:405,27,0	./.	1/1:0,2:2:6:90,6,0	./.	1/1:0,1:1:3:45,3,0	./.	1/1:0,1:1:3:45,3,0	./.	1/1:0,3:3:9:135,9,0	./.	1/1:0,4:4:12:180,12,0	./.	1/1:0,4:4:12:180,12,0	./.	./.
chr14	8034551	.	T	C	39.82	.	AC=1;AF=0.063;AN=16;BaseQRankSum=0.646;DP=109;ExcessHet=3.0103;FS=0.000;MLEAC=2;MLEAF=0.125;MQ=60.00;MQRankSum=0.000;QD=3.32;ReadPosRankSum=1.615;SOR=0.001	GT:AD:DP:GQ:PL	./.	0/1:10,2:12:45:45,0,357	./.	./.	./.	0/0:12,0:12:36:0,36,471	./.	0/0:7,0:7:21:0,21,254	./.	./.	./.	0/0:17,0:17:51:0,51,669	./.	0/0:17,0:17:50:0,50,622	./.	0/0:14,0:14:42:0,42,563	./.	0/0:20,0:20:60:0,60,775	./.	./.	./.	./.	./.	0/0:10,0:10:29:0,29,326
chr14	8034623	.	A	G	37.87	.	AC=2;AF=0.091;AN=22;BaseQRankSum=1.167;DP=103;ExcessHet=3.2222;FS=0.000;InbreedingCoeff=-0.1041;MLEAC=4;MLEAF=0.182;MQ=60.00;MQRankSum=0.000;QD=2.71;ReadPosRankSum=0.259;SOR=0.002	GT:AD:DP:GQ:PL	0/0:6,0:6:17:0,17,157	./.	./.	./.	0/1:12,2:14:28:28,0,338	./.	0/0:5,0:5:15:0,15,170	./.	0/0:14,0:14:42:0,42,478	./.	0/1:4,1:5:20:20,0,97	./.	0/0:14,0:14:42:0,42,478	./.	0/0:9,0:9:26:0,26,224	./.	0/0:7,0:7:21:0,21,239	./.	0/0:10,0:10:29:0,29,289	./.	0/0:13,0:13:38:0,38,397	./.	0/0:6,0:6:16:0,16,105	./.
chr14	8034654	.	CA	C	58.92	.	AC=1;AF=0.045;AN=22;BaseQRankSum=0.646;DP=129;ExcessHet=3.0103;FS=0.000;InbreedingCoeff=-0.0492;MLEAC=2;MLEAF=0.091;MQ=60.00;MQRankSum=0.000;QD=3.27;ReadPosRankSum=-1.430;SOR=0.001	GT:AD:DP:GQ:PL	0/0:8,0:8:24:0,24,323	./.	./.	./.	0/1:15,3:18:67:67,0,562	./.	0/0:6,0:6:18:0,18,242	./.	0/0:16,0:16:48:0,48,644	./.	0/0:9,0:9:27:0,27,366	./.	0/0:19,0:19:57:0,57,768	./.	0/0:10,0:10:30:0,30,402	./.	0/0:10,0:10:30:0,30,404	./.	0/0:12,0:12:36:0,36,483	./.	0/0:14,0:14:42:0,42,562	./.	0/0:7,0:7:21:0,21,283	./.
chr14	10110169	.	ACT	A	94.51	.	AC=4;AF=0.167;AN=24;BaseQRankSum=-0.519;DP=136;ExcessHet=4.2867;FS=0.000;InbreedingCoeff=-0.1853;MLEAC=6;MLEAF=0.250;MQ=60.00;MQRankSum=0.000;QD=2.86;ReadPosRankSum=-0.767;SOR=0.003	GT:AD:DP:GQ:PL	0/0:9,0:9:27:0,27,453	./.	0/1:16,2:18:36:36,0,742	./.	0/0:16,0:16:48:0,48,782	./.	0/1:7,1:8:21:21,0,318	./.	0/1:13,1:14:3:3,0,613	./.	0/0:11,0:11:33:0,33,519	./.	0/1:13,2:15:45:45,0,583	./.	0/0:6,0:6:18:0,18,302	./.	0/0:14,0:14:42:0,42,672	./.	0/0:4,0:4:12:0,12,202	./.	0/0:15,0:15:45:0,45,746	./.	0/0:6,0:6:18:0,18,292	./.
chr14	15680806	.	AGG	A	122.97	.	AC=6;AF=0.231;AN=26;BaseQRankSum=0.530;DP=33;ExcessHet=0.0027;FS=0.000;InbreedingCoeff=0.3555;MLEAC=7;MLEAF=0.269;MQ=34.95;MQRankSum=-2.780;QD=26.85;ReadPosRankSum=0.050;SOR=2.655	GT:AD:DP:GQ:PL	0/0:2,0:2:6:0,6,86	./.	./.	1/1:0,1:1:3:44,3,0	0/0:1,0:1:3:0,3,43	0/0:2,0:2:6:0,6,87	./.	./.	./.	0/0:1,0:1:3:0,3,43	./.	./.	0/0:3,0:3:9:0,9,130	0/0:5,0:5:15:0,15,215	0/0:2,0:2:6:0,6,87	0/0:1,0:1:3:0,3,45	0/0:1,0:1:3:0,3,43	0/0:1,0:1:3:0,3,43	./.	./.	./.	1/1:0,1:1:3:44,3,0	./.	1/1:0,1:1:3:44,3,0
chr14	15680808	.	G	*,A	729.38	.	AC=6,20;AF=0.231,0.769;AN=26;DP=22;ExcessHet=3.0103;FS=0.000;InbreedingCoeff=0.0875;MLEAC=7,28;MLEAF=0.269,1.00;MQ=39.88;QD=32.60;SOR=1.085	GT:AD:DP:GQ:PL	2/2:0,0,2:2:6:82,84,86,6,6,0	./.	./.	1/1:0,1,0:1:3:45,3,0,44,3,44	2/2:0,0,1:1:3:41,42,43,3,3,0	2/2:0,0,2:2:6:55,61,87,6,6,0	./.	./.	./.	2/2:0,0,1:1:3:29,32,43,3,3,0	./.	./.	2/2:0,0,3:3:9:108,113,130,9,9,0	2/2:0,0,5:5:15:123,137,215,15,15,0	2/2:0,0,2:2:6:68,72,87,6,6,0	2/2:0,0,1:1:3:45,45,45,3,3,0	2/2:0,0,1:1:3:41,42,43,3,3,0	2/2:0,0,1:1:3:29,32,43,3,3,0	./.	./.	./.	1/1:0,1,0:1:3:45,3,0,44,3,44	./.	1/1:0,1,0:1:3:45,3,0,44,3,44
chr14	16008579	.	C	T	421.43	.	AC=7;AF=0.875;AN=8;BaseQRankSum=-0.224;DP=12;ExcessHet=3.0103;FS=0.000;MLEAC=19;MLEAF=1.00;MQ=34.44;MQRankSum=2.281;QD=30.70;ReadPosRankSum=-3.015;SOR=3.611	GT:AD:DP:GQ:PL	1/1:0,2:2:6:74,6,0	./.	./.	./.	./.	./.	./.	./.	./.	./.	./.	./.	1/1:0,4:4:12:131,12,0	./.	1/1:0,2:2:6:66,6,0	./.	./.	./.	0/1:1,3:4:14:94,0,14	./.	./.	./.	./.	./.
chr14	16023363	.	G	A	893.66	.	AC=12;AF=1.00;AN=12;DP=29;ExcessHet=3.0103;FS=0.000;MLEAC=30;MLEAF=1.00;MQ=22.00;QD=30.82;SOR=6.804	GT:AD:DP:GQ:PL	./.	1/1:0,6:6:18:160,18,0	./.	./.	./.	./.	./.	./.	./.	1/1:0,9:9:27:241,27,0	./.	./.	./.	1/1:0,4:4:12:107,12,0	./.	1/1:0,3:3:9:80,9,0	./.	./.	./.	1/1:0,3:3:9:80,9,0	./.	1/1:0,4:4:12:107,12,0	./.	./.
chr14	16025638	.	G	A	417.99	.	AC=12;AF=1.00;AN=12;DP=12;ExcessHet=3.0103;FS=0.000;MLEAC=25;MLEAF=1.00;MQ=28.02;QD=29.02;SOR=5.136	GT:AD:DP:GQ:PL	./.	1/1:0,1:1:3:28,3,0	./.	./.	./.	./.	./.	./.	./.	1/1:0,5:5:15:134,15,0	./.	./.	./.	1/1:0,1:1:3:28,3,0	./.	1/1:0,3:3:9:83,9,0	./.	./.	./.	1/1:0,1:1:3:28,3,0	./.	1/1:0,1:1:3:28,3,0	./.	./.
chr14	17042094	.	T	G	3363.56	.	AC=32;AF=1.00;AN=32;BaseQRankSum=4.926;DP=95;ExcessHet=3.0103;FS=3.680;InbreedingCoeff=-0.0261;MLEAC=43;MLEAF=1.00;MQ=37.50;MQRankSum=-1.835;QD=25.01;ReadPosRankSum=-1.066;SOR=0.571	GT:AD:DP:GQ:PL	1/1:0,8:8:24:323,24,0	1/1:0,4:4:12:103,12,0	./.	./.	1/1:0,5:5:15:201,15,0	1/1:0,2:2:6:51,6,0	1/1:0,5:5:15:202,15,0	1/1:0,2:2:6:51,6,0	./.	./.	1/1:0,8:8:24:311,24,0	1/1:0,4:4:12:103,12,0	1/1:0,5:5:15:197,15,0	1/1:1,5:6:8:119,8,0	1/1:0,5:5:15:202,15,0	1/1:0,8:8:24:206,24,0	1/1:0,6:6:18:242,18,0	1/1:0,9:9:27:232,27,0	./.	./.	./.	./.	1/1:0,10:10:30:365,30,0	1/1:0,8:8:24:206,24,0
chr14	19240903	.	A	G	220.59	.	AC=4;AF=1.00;AN=4;DP=7;ExcessHet=3.0103;FS=0.000;MLEAC=14;MLEAF=1.00;MQ=30.59;QD=31.51;SOR=4.174	GT:AD:DP:GQ:PL	1/1:0,5:5:15:149,15,0	./.	./.	./.	./.	./.	./.	./.	./.	./.	./.	./.	./.	./.	./.	./.	1/1:0,2:2:6:36,6,0	./.	./.	./.	./.	./.	./.	./.
chr14	27557215	.	A	G	551.9	.	AC=8;AF=0.333;AN=24;BaseQRankSum=0.025;DP=50;ExcessHet=10.6475;FS=0.000;InbreedingCoeff=-0.5596;MLEAC=14;MLEAF=0.583;MQ=60.00;MQRankSum=0.000;QD=22.08;ReadPosRankSum=-0.950;SOR=0.212	GT:AD:DP:GQ:PL	0/1:3,2:5:62:62,0,107	./.	0/1:1,2:3:32:73,0,32	./.	0/1:4,1:5:26:26,0,117	./.	0/1:4,2:6:63:63,0,145	./.	0/0:5,0:5:15:0,15,173	./.	0/1:3,3:6:99:104,0,104	./.	0/1:3,1:4:29:29,0,110	./.	0/0:1,0:1:3:0,3,41	./.	0/1:3,1:4:29:29,0,110	./.	0/1:1,4:5:26:148,0,26	./.	0/0:2,0:2:6:0,6,82	./.	0/0:4,0:4:12:0,12,163	./.
chr19	213516	.	CT	C	267.03	.	AC=12;AF=0.261;AN=46;BaseQRankSum=0.700;DP=199;ExcessHet=4.7104;FS=0.000;InbreedingCoeff=-0.2156;MLEAC=12;MLEAF=0.261;MQ=59.80;MQRankSum=-6.021;QD=3.47;ReadPosRankSum=-4.187;SOR=0.014	GT:AD:DP:GQ:PL	0/1:8,1:9:6:6,0,234	0/0:12,0:12:36:0,36,391	0/1:5,2:7:44:44,0,142	0/1:10,2:12:29:29,0,289	0/1:2,1:3:24:24,0,56	0/1:12,2:14:23:23,0,342	0/0:3,0:3:9:0,9,109	0/0:9,0:9:27:0,27,292	0/0:1,0:1:3:0,3,33	0/0:12,0:12:36:0,36,391	0/0:1,0:1:3:0,3,32	0/0:5,0:5:15:0,15,162	0/0:7,0:7:21:0,21,228	0/0:18,1:19:24:0,24,553	0/1:5,1:6:15:15,0,145	0/1:18,3:21:12:12,0,548	0/0:3,0:3:9:0,9,97	0/1:13,2:15:20:20,0,386	1/1:0,1:1:3:33,3,0	0/0:7,0:7:21:0,21,227	0/1:5,1:6:15:15,0,145	0/0:18,0:18:54:0,54,587	./.	0/1:5,3:8:74:74,0,142
chr19	213521	.	TC	T	39.32	.	AC=2;AF=0.043;AN=46;BaseQRankSum=-1.115;DP=199;ExcessHet=3.1079;FS=0.000;InbreedingCoeff=-0.0856;MLEAC=2;MLEAF=0.043;MQ=59.80;MQRankSum=0.375;QD=1.64;ReadPosRankSum=-2.489;SOR=0.001	GT:AD:DP:GQ:PL	0/0:9,0:9:27:0,27,326	0/0:12,0:12:36:0,36,428	0/0:7,0:7:21:0,21,259	0/0:12,0:12:36:0,36,434	0/0:3,0:3:9:0,9,112	0/0:13,1:14:16:0,16,447	0/1:1,2:3:28:31,0,28	0/0:9,0:9:27:0,27,321	0/0:1,0:1:3:0,3,36	0/0:12,0:12:36:0,36,426	0/0:1,0:1:3:0,3,36	0/0:4,0:4:12:0,12,140	0/0:7,0:7:21:0,21,250	0/0:19,0:19:57:0,57,676	0/0:6,0:6:18:0,18,219	0/1:18,3:21:44:44,0,557	0/0:2,0:2:6:0,6,71	0/0:13,1:14:6:0,6,438	0/0:1,0:1:3:0,3,41	0/0:7,0:7:21:0,21,249	0/0:6,0:6:18:0,18,219	0/0:18,0:18:54:0,54,639	./.	0/0:7,1:8:19:0,19,260
chr19	213526	.	CA	C	246.11	.	AC=9;AF=0.196;AN=46;BaseQRankSum=-0.823;DP=186;ExcessHet=7.2151;FS=0.000;InbreedingCoeff=-0.2969;MLEAC=10;MLEAF=0.217;MQ=59.78;MQRankSum=-6.506;QD=4.32;ReadPosRankSum=-5.095;SOR=0.010	GT:AD:DP:GQ:PL	0/0:9,0:9:27:0,27,336	0/0:11,0:11:33:0,33,411	0/1:3,2:5:60:60,0,97	0/1:7,1:8:13:13,0,236	0/0:3,0:3:9:0,9,112	0/0:13,1:14:5:0,5,447	0/1:2,1:3:28:28,0,65	0/1:8,1:9:10:10,0,271	0/0:1,0:1:3:0,3,37	0/1:9,2:11:40:40,0,301	0/0:1,0:1:3:0,3,34	0/0:3,0:3:9:0,9,112	0/0:7,0:7:21:0,21,258	0/0:19,0:19:57:0,57,698	0/0:6,0:6:18:0,18,225	0/1:19,2:21:12:12,0,646	0/0:2,0:2:6:0,6,75	0/1:11,2:13:36:36,0,369	0/0:1,0:1:3:0,3,37	0/1:5,2:7:53:53,0,163	0/1:4,1:5:22:22,0,131	0/0:16,1:17:14:0,14,549	./.	0/0:7,0:7:21:0,21,258
chr19	1241475	.	GT	G	84.44	.	AC=4;AF=0.250;AN=16;BaseQRankSum=0.869;DP=82;ExcessHet=0.9691;FS=0.000;MLEAC=6;MLEAF=0.375;MQ=60.00;MQRankSum=0.000;QD=8.44;ReadPosRankSum=-3.526;SOR=0.012	GT:AD:DP:GQ:PL	./.	0/1:8,2:10:45:45,0,265	./.	0/0:4,0:4:12:0,12,150	./.	./.	./.	0/0:10,0:10:30:0,30,372	./.	0/0:13,1:14:5:0,5,448	./.	1/1:0,1:1:3:37,3,0	./.	0/0:14,1:15:8:0,8,485	./.	0/0:14,1:15:8:0,8,483	./.	./.	./.	./.	./.	0/1:10,1:11:4:4,0,341	./.	./.
chr19	9737428	.	C	T	313.63	.	AC=8;AF=1.00;AN=8;DP=10;ExcessHet=3.0103;FS=0.000;MLEAC=20;MLEAF=1.00;MQ=22.00;QD=31.09;SOR=4.804	GT:AD:DP:GQ:PL	./.	./.	./.	./.	./.	./.	./.	./.	./.	./.	./.	./.	./.	1/1:0,6:6:18:143,18,0	./.	1/1:0,2:2:6:53,6,0	./.	./.	./.	1/1:0,1:1:3:27,3,0	./.	1/1:0,1:1:3:27,3,0	./.	./.
chr19	9737445	.	A	T	330.63	.	AC=8;AF=1.00;AN=8;DP=10;ExcessHet=3.0103;FS=0.000;MLEAC=20;MLEAF=1.00;MQ=22.00;QD=34.47;SOR=4.804	GT:AD:DP:GQ:PL	./.	./.	./.	./.	./.	./.	./.	./.	./.	./.	./.	./.	./.	1/1:0,6:6:18:160,18,0	./.	1/1:0,2:2:6:53,6,0	./.	./.	./.	1/1:0,1:1:3:27,3,0	./.	1/1:0,1:1:3:27,3,0	./.	./.
chr19	11615144	.	G	A	872.14	.	AC=12;AF=1.00;AN=12;DP=17;ExcessHet=3.0103;FS=0.000;MLEAC=28;MLEAF=1.00;MQ=22.89;QD=28.33;SOR=5.784	GT:AD:DP:GQ:PL	./.	1/1:0,3:3:9:135,9,0	./.	./.	./.	./.	./.	./.	./.	1/1:0,3:3:9:135,9,0	./.	./.	./.	1/1:0,3:3:9:135,9,0	./.	1/1:0,3:3:9:135,9,0	./.	./.	./.	1/1:0,2:2:6:90,6,0	./.	1/1:0,3:3:9:135,9,0	./.	./.
chr19	11615148	.	T	G	872.14	.	AC=12;AF=1.00;AN=12;DP=17;ExcessHet=3.0103;FS=0.000;MLEAC=28;MLEAF=1.00;MQ=22.89;QD=33.86;SOR=5.784	GT:AD:DP:GQ:PL	./.	1/1:0,3:3:9:135,9,0	./.	./.	./.	./.	./.	./.	./.	1/1:0,3:3:9:135,9,0	./.	./.	./.	1/1:0,3:3:9:135,9,0	./.	1/1:0,3:3:9:135,9,0	./.	./.	./.	1/1:0,2:2:6:90,6,0	./.	1/1:0,3:3:9:135,9,0	./.	./.
chr19	14977165	.	G	A	788.33	.	AC=16;AF=1.00;AN=16;DP=15;ExcessHet=3.0103;FS=0.000;MLEAC=29;MLEAF=1.00;MQ=50.00;QD=33.50;SOR=5.549	GT:AD:DP:GQ:PL	1/1:0,1:1:3:45,3,0	./.	1/1:0,1:1:3:45,3,0	./.	1/1:0,2:2:6:90,6,0	./.	1/1:0,1:1:3:45,3,0	./.	1/1:0,1:1:3:45,3,0	./.	./.	./.	./.	./.	1/1:0,4:4:12:180,12,0	./.	1/1:0,4:4:12:180,12,0	./.	./.	./.	./.	./.	1/1:0,1:1:3:45,3,0	./.
chr19	14977169	.	G	T	788.33	.	AC=16;AF=1.00;AN=16;DP=15;ExcessHet=3.0103;FS=0.000;MLEAC=29;MLEAF=1.00;MQ=50.00;QD=31.02;SOR=5.549	GT:AD:DP:GQ:PL	1/1:0,1:1:3:45,3,0	./.	1/1:0,1:1:3:45,3,0	./.	1/1:0,2:2:6:90,6,0	./.	1/1:0,1:1:3:45,3,0	./.	1/1:0,1:1:3:45,3,0	./.	./.	./.	./.	./.	1/1:0,4:4:12:180,12,0	./.	1/1:0,4:4:12:180,12,0	./.	./.	./.	./.	./.	1/1:0,1:1:3:45,3,0	./.
chr19	14977174	.	G	A	788.33	.	AC=16;AF=1.00;AN=16;DP=15;ExcessHet=3.0103;FS=0.000;MLEAC=29;MLEAF=1.00;MQ=50.00;QD=33.14;SOR=5.549	GT:AD:DP:GQ:PL	1/1:0,1:1:3:45,3,0	./.	1/1:0,1:1:3:45,3,0	./.	1/1:0,2:2:6:90,6,0	./.	1/1:0,1:1:3:45,3,0	./.	1/1:0,1:1:3:45,3,0	./.	./.	./.	./.	./.	1/1:0,4:4:12:180,12,0	./.	1/1:0,4:4:12:180,12,0	./.	./.	./.	./.	./.	1/1:0,1:1:3:45,3,0	./.
chr19	18397154	.	CT	C	49.35	.	AC=2;AF=0.071;AN=28;BaseQRankSum=0.377;DP=105;ExcessHet=3.1742;FS=6.120;InbreedingCoeff=-0.1204;MLEAC=3;MLEAF=0.107;MQ=22.46;MQRankSum=-3.327;QD=5.48;ReadPosRankSum=0.200;SOR=2.833	GT:AD:DP:GQ:PL	0/0:2,0:2:6:0,6,71	0/0:5,0:5:15:0,15,178	0/0:1,0:1:3:0,3,36	./.	./.	./.	./.	./.	./.	0/0:1,0:1:3:0,3,36	./.	./.	0/0:7,0:7:21:0,21,249	0/0:4,0:4:12:0,12,142	0/0:4,0:4:12:0,12,143	0/1:5,1:6:18:18,0,159	0/0:9,0:9:27:0,27,321	0/1:7,2:9:44:44,0,222	0/0:18,0:18:54:0,54,641	0/0:14,0:14:42:0,42,499	./.	./.	0/0:10,0:10:30:0,30,356	0/0:15,0:15:45:0,45,533
chr19	18397163	.	TG	T	32.01	.	AC=1;AF=0.071;AN=14;BaseQRankSum=-3.660;DP=60;ExcessHet=3.0103;FS=0.000;MLEAC=3;MLEAF=0.214;MQ=22.04;MQRankSum=0.252;QD=2.13;ReadPosRankSum=-3.307;SOR=0.003	GT:AD:DP:GQ:PL	./.	0/0:5,0:5:15:0,15,202	./.	./.	./.	./.	./.	./.	./.	0/0:1,0:1:3:0,3,40	./.	./.	./.	0/0:4,0:4:12:0,12,161	./.	0/0:6,0:6:18:0,18,242	./.	0/0:9,0:9:27:0,27,363	./.	0/0:14,0:14:42:0,42,565	./.	./.	./.	0/1:13,2:15:35:35,0,467
chr19	20750846	.	GT	G	418.7	.	AC=6;AF=0.500;AN=12;BaseQRankSum=1.374;DP=36;ExcessHet=14.6052;FS=0.000;MLEAC=15;MLEAF=1.00;MQ=42.80;MQRankSum=-5.249;QD=19.94;ReadPosRankSum=1.120;SOR=0.293	GT:AD:DP:GQ:PL	0/1:9,1:10:7:7,0,307	./.	./.	./.	./.	./.	./.	./.	0/1:1,3:4:25:100,0,25	./.	./.	./.	0/1:4,1:5:22:22,0,135	./.	0/1:2,2:4:62:63,0,62	./.	./.	./.	0/1:4,4:8:99:126,0,129	./.	0/1:3,2:5:60:60,0,99	./.	./.	./.
chr19	20750848	.	T	A	88.25	.	AC=3;AF=0.250;AN=12;BaseQRankSum=-3.754;DP=36;ExcessHet=4.3933;FS=0.000;MLEAC=8;MLEAF=0.667;MQ=42.80;MQRankSum=0.473;QD=8.02;ReadPosRankSum=0.000;SOR=0.113	GT:AD:DP:GQ:PL	0/0:7,2:9:8:0,8,264	./.	./.	./.	./.	./.	./.	./.	0/0:4,0:4:12:0,12,153	./.	./.	./.	0/1:4,1:5:13:13,0,145	./.	0/0:3,1:4:2:0,2,102	./.	./.	./.	0/1:5,2:7:34:34,0,170	./.	0/1:2,2:4:26:26,0,63	./.	./.	./.
